# Supplementary material for: Genome-wide discovery of novel M1T1 group A streptococcal determinants important for fitness and virulence during soft-tissue infection
Source: PubMed Central journal article supplement (PMC5584981; doi:10.1371/journal.ppat.1006584), 2017-08-23
Supplement: ppat.1006584.s010.pdf [file ppat.1006584.s010.pdf]

S4 Table. Bacterial strains and plasmids.

| Strains and plasmids              | Description                                                                             | Reference our source            |
|-----------------------------------|-----------------------------------------------------------------------------------------|---------------------------------|
| <b><i>E. coli</i> strains</b>     |                                                                                         |                                 |
| DH5 $\alpha$                      | <i>hsdR17 recA1 gyrA endA1 relA1</i>                                                    | Hanahan and Meselson, 1983      |
| <b><i>S. pyogenes</i> strains</b> |                                                                                         |                                 |
| 5448                              | M1T1                                                                                    | Chatellier <i>et al.</i> , 2000 |
| 5448ii01780                       | 5448 with insertional inactivation of RS01780 ( <i>pmi</i> ) using pII1538, SpR         | This study                      |
| 5448ii06460                       | 5448 with insertional inactivation of RS06460 ( <i>sagH</i> ) using pII0569, SpR        | This study                      |
| 5448ii02780                       | 5448 with insertional inactivation of RS02780 ( <i>yvqE</i> ) using pII1333, SpR        | This study                      |
| 5448ii08695                       | 5448 with insertional inactivation of RS08695 ( <i>ptsG</i> ) using pII1784, SpR        | This study                      |
| 5448ii04625                       | 5448 with insertional inactivation of RS04625 ( <i>pstS</i> ) using pII0955, SpR        | This study                      |
| 5448ii05865                       | 5448 with insertional inactivation of RS05825 ( <i>vfr</i> ) using pII0693, SpR         | This study                      |
| 5448ii02065                       | 5448 with insertional inactivation of RS02065 ( <i>manL</i> ) using pII1479, SpR        | This study                      |
| 5448ii02090                       | 5448 with insertional inactivation of RS02090 ( <i>cpsA</i> ) using pII1474, SpR        | This study                      |
| 5448ii04065                       | 5448 with insertional inactivation of RS04065 ( <i>dltA</i> ) using pII1073, SpR        | This study                      |
| 5448ii06590                       | 5448 with insertional inactivation of RS06590 ( <i>adcA</i> ) using pII0543, SpR        | This study                      |
| 5448ii00535                       | 5448 with insertional inactivation of RS00535 ( <i>adcR</i> ) using pII0077, SpR        | This study                      |
| 5448ii02880                       | 5448 with insertional inactivation of RS02880 ( <i>rocA</i> ) using pII1318, SpR        | This study                      |
| 5448ii04605                       | 5448 with insertional inactivation of RS04605 ( <i>spxA</i> ) using pII0959, SpR        | This study                      |
| 5448ii08425                       | 5448 with insertional inactivation of RS08425 ( <i>ihk</i> ) using pII1724, SpR         | This study                      |
| 5448KM07790                       | 5448 with <i>Krmit</i> transposon insertion in RS07790 ( <i>covS</i> ), KmR             | This study                      |
| 5448KM08410                       | 5448 with <i>Krmit</i> transposon insertion in RS08410 ( <i>mga</i> ), KmR              | This study                      |
| 5448KM09015                       | 5448 with <i>Krmit</i> transposon insertion in RS09015, KmR                             | This study                      |
| 5448KM09010                       | 5448 with <i>Krmit</i> transposon insertion in RS09010, KmR                             | This study                      |
| 5448KM06895                       | 5448 with <i>Krmit</i> transposon insertion in RS06895 ( <i>scfB</i> ), KmR             | This study                      |
| 5448 $\Delta$ <i>scfA</i>         | 5448 with allelic replacement of RS06890 ( <i>scfA</i> ) by <i>aphA3</i> , KmR          | This study                      |
| 5448 $\Delta$ <i>scfB</i>         | 5448 with allelic replacement of RS06895 ( <i>scfB</i> ) by <i>aphA3</i> , KmR          | This study                      |
| 5448 $\Delta$ <i>scfAB</i>        | 5448 with allelic replacement of RS06890-RS06895 ( <i>scfAB</i> ) by <i>aphA3</i> , KmR | This study                      |
| <b>Plasmids</b>                   |                                                                                         |                                 |
| pSinS                             | Suicide plasmid for stable insertional inactivation; Sp <sup>R</sup>                    | Le Breton <i>et al.</i> , 2015  |

**S4 Table. Bacterial strains and plasmids (continued)**

| Strains and plasmids | Description                                                                 | Reference our source           |
|----------------------|-----------------------------------------------------------------------------|--------------------------------|
| <b>Plasmids</b>      |                                                                             |                                |
| pHlpK                | Temperature-sensitive conditional helper vector; Km <sup>R</sup>            | Le Breton <i>et al.</i> , 2015 |
| pCRS                 | Temperature-sensitive conditional vector; Sp <sup>R</sup>                   | Le Breton <i>et al.</i> 2013   |
| pII1538              | pSinS-based suicide plasmid for insertional inactivation of RS01780; SpR    | This study                     |
| pII0569              | pSinS-based suicide plasmid for insertional inactivation of RS06460; SpR    | This study                     |
| pII1333              | pSinS-based suicide plasmid for insertional inactivation of RS02780; SpR    | This study                     |
| pII1784              | pSinS-based suicide plasmid for insertional inactivation of RS08695; SpR    | This study                     |
| pII0955              | pSinS-based suicide plasmid for insertional inactivation of RS04625; SpR    | This study                     |
| pII0693              | pSinS-based suicide plasmid for insertional inactivation of RS05865; SpR    | This study                     |
| pII1479              | pSinS-based suicide plasmid for insertional inactivation of RS02065; SpR    | This study                     |
| pII1474              | pSinS-based suicide plasmid for insertional inactivation of RS02090; SpR    | This study                     |
| pII1073              | pSinS-based suicide plasmid for insertional inactivation of RS04065; SpR    | This study                     |
| pII0543              | pSinS-based suicide plasmid for insertional inactivation of RS06590; SpR    | This study                     |
| pII0077              | pSinS-based suicide plasmid for insertional inactivation of RS00535; SpR    | This study                     |
| pII1318              | pSinS-based suicide plasmid for insertional inactivation of RS02880; SpR    | This study                     |
| pII0959              | pSinS-based suicide plasmid for insertional inactivation of RS04605; SpR    | This study                     |
| pII1727              | pSinS-based suicide plasmid for insertional inactivation of RS08425; SpR    | This study                     |
| pAX0478K             | pCRS-based plasmid for allelic exchange of the <i>scfA</i> ORF; SpR, KmR    | This study                     |
| pAX0477K             | pCRS-based plasmid for allelic exchange of the <i>scfB</i> ORF; SpR, KmR    | This study                     |
| pAX0478-77K          | pCRS-based plasmid for allelic exchange of the <i>scfAB</i> locus; SpR, KmR | This study                     |
