# Supplementary material for: Genome-wide discovery of novel M1T1 group A streptococcal determinants important for fitness and virulence during soft-tissue infection
Source: PubMed Central journal article supplement (PMC5584981; doi:10.1371/journal.ppat.1006584), 2017-08-23
Supplement: ppat.1006584.s011.pdf [file ppat.1006584.s011.pdf]

Table S5. Primers used in this study.

| Name and purpose                                                           | Sequence (5' - 3') (with underlined feature) | Purpose/target                                    | Feature       |
|----------------------------------------------------------------------------|----------------------------------------------|---------------------------------------------------|---------------|
| <b>Production of pSinS-based vectors for gene insertional inactivation</b> |                                              |                                                   |               |
| oII1538F                                                                   | ccc <u>GGATCC</u> ATGCACGACAGGATTTGGGG       | internal fragment of RS01780 gene ( <i>pmi</i> )  | <i>Bam</i> HI |
| oII1538R                                                                   | ccc <u>GGATCC</u> TCTCCTTCATGTTACAGTCC       | internal fragment of RS01780 gene ( <i>pmi</i> )  | <i>Bam</i> HI |
| M13F                                                                       | GTTTTCCCAGTCACGACGTTGTA                      | DNA sequencing of plasmid insert                  |               |
| M13R                                                                       | CAGGAAACAGCTATGACC                           | DNA sequencing of plasmid insert                  |               |
| oII1538V1                                                                  | TACGGTTATATCACAACCACTCC                      | RS01780 mutant genotyping                         |               |
| oII1538V2                                                                  | AATAAAATCAATCATCGTAGTCACC                    | RS01780 mutant genotyping                         |               |
| oII0569F                                                                   | ccc <u>GGATCC</u> CAGATTTTTAGAAAACCGAACAGC   | internal fragment of RS06460 gene ( <i>sagH</i> ) | <i>Bam</i> HI |
| oII0569R                                                                   | ccc <u>GGATCC</u> AAAACAGCCGTTAAGGCTCC       | internal fragment of RS06460 gene ( <i>sagH</i> ) | <i>Bam</i> HI |
| oII0569V1                                                                  | CCGGTAAAATTACTGTTTTAGG                       | RS06460 mutant genotyping                         |               |
| oII0569V2                                                                  | CGTCACCTGCTTCTCATAACC                        | RS06460 mutant genotyping                         |               |
| oII1333F                                                                   | ccc <u>GGATCC</u> GGCTCTACTCAACCATTACC       | internal fragment of RS02780 gene ( <i>yvqE</i> ) | <i>Bam</i> HI |
| oII1333R                                                                   | ccc <u>GGATCC</u> CTTTTGCATGTTAGCAGTCAGG     | internal fragment of RS02780 gene ( <i>yvqE</i> ) | <i>Bam</i> HI |
| oII1333V1                                                                  | AACTACTCGTCATATAAAGATGC                      | RS02780 mutant genotyping                         |               |
| oII1333V2                                                                  | AAATCAACCCCTTCACGTCC                         | RS02780 mutant genotyping                         |               |
| oII1784F                                                                   | ccc <u>GGATCC</u> CGTCTTCTAACTGCTATTGGTGG    | internal fragment of RS08695 gene ( <i>ptsG</i> ) | <i>Bam</i> HI |
| oII1784R                                                                   | ccc <u>GGATCC</u> GTGAAAATCTCAGCCAACATGG     | internal fragment of RS08695 gene ( <i>ptsG</i> ) | <i>Bam</i> HI |
| oII1784V1                                                                  | ATCGGTTATTTGGTCAATGGTAACC                    | RS08695 mutant genotyping                         |               |
| oII1784V2                                                                  | ATATTTGAAAGAGCAATCATTGG                      | RS08695 mutant genotyping                         |               |
| oII0955F                                                                   | ccc <u>GGATCC</u> ATTCTTTTTGTTAAGTCTTTTGGC   | internal fragment of RS04625 gene ( <i>pstS</i> ) | <i>Bam</i> HI |
| oII0955R                                                                   | ccc <u>GGATCC</u> ACTGCAAGTCTTGCAACAGC       | internal fragment of RS04625 gene ( <i>pstS</i> ) | <i>Bam</i> HI |
| oII0955V1                                                                  | AAAATGAAGATGTTGTGCAGTGG                      | RS04625 mutant genotyping                         |               |
| oII0955V2                                                                  | AGAGCACCAAGATAAGGAATGC                       | RS04625 mutant genotyping                         |               |
| oII0693F                                                                   | ccc <u>GGATCC</u> CTAAAGGAAAGTCATTGTTATGC    | internal fragment of RS05865 gene ( <i>vfr</i> )  | <i>Bam</i> HI |
| oII0693R                                                                   | ccc <u>GGATCC</u> GAACTAAAACCTCAAGTCAACG     | internal fragment of RS05865 gene ( <i>vfr</i> )  | <i>Bam</i> HI |
| oII0693V1                                                                  | ACAAGTCTTAAATACCCATAACG                      | RS05865 mutant genotyping                         |               |
| oII0693V2                                                                  | TAGTATCATTAAATTTAATCATCTGC                   | RS05865 mutant genotyping                         |               |
| oII1479F                                                                   | ccc <u>GGATCC</u> GCCATGGTAAATTTGCTGAAGG     | internal fragment of RS02065 gene ( <i>manL</i> ) | <i>Bam</i> HI |
| oII1479R                                                                   | ccc <u>GGATCC</u> GTTCAGTGTAAAGCTTGAATAAGC   | internal fragment of RS02065 gene ( <i>manL</i> ) | <i>Bam</i> HI |
| oII1479V1                                                                  | TTAGAGATTACCAAAAATCACTCG                     | RS02065 mutant genotyping                         |               |
| oII1479V2                                                                  | AACGACCAAAATTCGAGAAATAATCG                   | RS02065 mutant genotyping                         |               |

Table S5. Primers used in this study (continued).

| Name and purpose                                                           | Sequence (5' - 3') (with underlined feature)          | Role                                              | Feature       |
|----------------------------------------------------------------------------|-------------------------------------------------------|---------------------------------------------------|---------------|
| <b>Production of pSinS-based vectors for gene insertional inactivation</b> |                                                       |                                                   |               |
| oII1474F                                                                   | ccc <u>GGATCC</u> CCTATTGTGTTAAACAACCTGTCTTGG         | internal fragment of RS02090 gene ( <i>cpsA</i> ) | <i>Bam</i> HI |
| oII1474R                                                                   | ccc <u>GGATCC</u> GATAACGTGGTTAAGGTATCTCG             | internal fragment of RS02090 gene ( <i>cpsA</i> ) | <i>Bam</i> HI |
| oII1474V                                                                   | TTTACTGTCTGAGACTTAGTTGACC                             | RS02090 mutant genotyping                         |               |
| oII1073F                                                                   | ccc <u>GGATCC</u> CAGTTTGCTCAGACACAGGC                | internal fragment of RS04065 gene ( <i>dltA</i> ) | <i>Bam</i> HI |
| oII1073R                                                                   | ccc <u>GGATCC</u> GTAAGAGGGAATTCCTCAATAGC             | internal fragment of RS04065 gene ( <i>dltA</i> ) | <i>Bam</i> HI |
| oII1073V                                                                   | AAGATAACTCCTTACCATCTTC                                | RS04065 mutant genotyping                         |               |
| oII0543F                                                                   | ccc <u>GGATCC</u> GCTTGCCAACCTTACTCAGGC               | internal fragment of RS06590 gene ( <i>acdA</i> ) | <i>Bam</i> HI |
| oII0543R                                                                   | ccc <u>GGATCC</u> CATGTCCAGCTCCTGCTACC                | internal fragment of RS06590 gene ( <i>acdA</i> ) | <i>Bam</i> HI |
| oII0543V                                                                   | GACGATCTTTGACTTCTTTGTC                                | RS06590 mutant genotyping                         |               |
| oII0077F                                                                   | ccc <u>GGATCC</u> GTAATACTATTTTATATAAAAGC             | internal fragment of RS00535 gene ( <i>acdR</i> ) | <i>Bam</i> HI |
| oII0077R                                                                   | ccc <u>GGATCC</u> AAGTCACCCTAGCATCAACC                | internal fragment of RS00535 gene ( <i>acdR</i> ) | <i>Bam</i> HI |
| oII0077V                                                                   | GGGTAATCATCAGAACGGATTTCC                              | RS00535 mutant genotyping                         |               |
| oII1318F                                                                   | ccc <u>GGATCC</u> GTAAGTGCAATTCGCTTCC                 | internal fragment of RS02880 gene ( <i>rocA</i> ) | <i>Bam</i> HI |
| oII1318R                                                                   | ccc <u>GGATCC</u> GTAATTATGTTTAAACAACCTGAATAAG        | internal fragment of RS02880 gene ( <i>rocA</i> ) | <i>Bam</i> HI |
| oII1318V                                                                   | CTATAGCATTATCTAACAATAATGAC                            | RS02880 mutant genotyping                         |               |
| oII0959F                                                                   | ccc <u>GGATCC</u> GTCGTAAGCAAGGGCATGG                 | internal fragment of RS04605 gene ( <i>spxA</i> ) | <i>Bam</i> HI |
| oII0959R                                                                   | ccc <u>GGATCC</u> TCCATGATAATAGGGCGACG                | internal fragment of RS04605 gene ( <i>spxA</i> ) | <i>Bam</i> HI |
| oII0959V                                                                   | ATCTGCCATCACATCATAAATAAGC                             | RS04605 mutant genotyping                         |               |
| oII1724F                                                                   | 5' -ccc <u>GGATCC</u> GGTTACCTCTATTTTGTAGTGC - 3'     | internal fragment of RS08425 gene ( <i>ihk</i> )  | <i>Bam</i> HI |
| oII1724R                                                                   | 5' -ccc <u>GGATCC</u> CACATTAGAATAAGAGTTGTCAAAGG - 3' | internal fragment of RS08425 gene ( <i>ihk</i> )  | <i>Bam</i> HI |
| oII1724V                                                                   | 5' -ACATGCTAAGGATACGCCGG - 3'                         | RS08425 mutant genotyping                         |               |
| <b>Production of <i>Krmit</i> insertion tags</b>                           |                                                       |                                                   |               |
| Adapter501A                                                                | TTCCCTACACGACGCTCTTCCGATCTTATAGCCTNN                  | <i>Mme</i> I Tnseq adapter                        | Adapter501    |
| Adapter501B                                                                | <u>AGGCTATA</u> AAGATCGGAAGAGCGTCGTGTAGGGAAAGAG       | <i>Mme</i> I Tnseq adapter                        | Adapter501    |
| Adapter502A                                                                | TTCCCTACACGACGCTCTTCCGATCTATAGAGGCNN                  | <i>Mme</i> I Tnseq adapter                        | Adapter502    |
| Adapter502B                                                                | <u>GCCTCTATA</u> GATCGGAAGAGCGTCGTGTAGGGAAAGAG        | <i>Mme</i> I Tnseq adapter                        | Adapter502    |
| Adapter503A                                                                | TTCCCTACACGACGCTCTTCCGATCTCCTATCCTNN                  | <i>Mme</i> I Tnseq adapter                        | Adapter503    |
| Adapter503B                                                                | <u>AGGATAGG</u> GATCGGAAGAGCGTCGTGTAGGGAAAGAG         | <i>Mme</i> I Tnseq adapter                        | Adapter503    |
| Adapter504A                                                                | TTCCCTACACGACGCTCTTCCGATCTGGCTCTGANN                  | <i>Mme</i> I Tnseq adapter                        | Adapter504    |
| Adapter504B                                                                | <u>TCAGAGCC</u> CAGATCGGAAGAGCGTCGTGTAGGGAAAGAG       | <i>Mme</i> I Tnseq adapter                        | Adapter504    |

Table S5. Primers used in this study (continued).

| Name and purpose                                                                       | Sequence (5' - 3') (with underlined feature)                   | Role                                       | Feature            |
|----------------------------------------------------------------------------------------|----------------------------------------------------------------|--------------------------------------------|--------------------|
| <b>Production of <i>Krmit</i> insertion tags</b>                                       |                                                                |                                            |                    |
| Adapter505A                                                                            | TTCCCTACACGACGCTCTTCCGATCT <u>AGGCCGAA</u> GNN                 | <i>Mmel</i> Tnseq adapter                  | Adapter505         |
| Adapter505B                                                                            | <u>CTTCGCCTAGATCGGAAGAGCGTCGTGTAGGGAAAGAG</u>                  | <i>Mmel</i> Tnseq adapter                  | Adapter505         |
| Adapter506A                                                                            | TTCCCTACACGACGCTCTTCCGATCT <u>TAATCTTANN</u>                   | <i>Mmel</i> Tnseq adapter                  | Adapter506         |
| Adapter506B                                                                            | <u>TAAGATTAAGATCGGAAGAGCGTCGTGTAGGGAAAGAG</u>                  | <i>Mmel</i> Tnseq adapter                  | Adapter506         |
| Adapter507A                                                                            | TTCCCTACACGACGCTCTTCCGATCT <u>CAGGACGTNN</u>                   | <i>Mmel</i> Tnseq adapter                  | Adapter507         |
| Adapter507B                                                                            | <u>ACGTCTTGAGATCGGAAGAGCGTCGTGTAGGGAAAGAG</u>                  | <i>Mmel</i> Tnseq adapter                  | Adapter507         |
| Adapter508A                                                                            | TTCCCTACACGACGCTCTTCCGATCT <u>GTACTGACNN</u>                   | <i>Mmel</i> Tnseq adapter                  | Adapter508         |
| Adapter508B                                                                            | <u>GTCAGTACAGATCGGAAGAGCGTCGTGTAGGGAAAGAG</u>                  | <i>Mmel</i> Tnseq adapter                  | Adapter508         |
| Adapter701A                                                                            | TTCCCTACACGACGCTCTTCCGATCT <u>ATTACTCGNN</u>                   | <i>Mmel</i> Tnseq adapter                  | Adapter701         |
| Adapter701B                                                                            | <u>CGAGTAATAGATCGGAAGAGCGTCGTGTAGGGAAAGAG</u>                  | <i>Mmel</i> Tnseq adapter                  | Adapter701         |
| Adapter702A                                                                            | TTCCCTACACGACGCTCTTCCGATCT <u>TCCGGAGANN</u>                   | <i>Mmel</i> Tnseq adapter                  | Adapter702         |
| Adapter702B                                                                            | <u>TCTCCGGAAGATCGGAAGAGCGTCGTGTAGGGAAAGAG</u>                  | <i>Mmel</i> Tnseq adapter                  | Adapter702         |
| Adapter703A                                                                            | TTCCCTACACGACGCTCTTCCGATCT <u>CGCTCATTNN</u>                   | <i>Mmel</i> Tnseq adapter                  | Adapter703         |
| Adapter703B                                                                            | <u>AATGAGCGAGATCGGAAGAGCGTCGTGTAGGGAAAGAG</u>                  | <i>Mmel</i> Tnseq adapter                  | Adapter703         |
| Adapter704A                                                                            | TTCCCTACACGACGCTCTTCCGATCT <u>GAGATTCCNN</u>                   | <i>Mmel</i> Tnseq adapter                  | Adapter704         |
| Adapter704B                                                                            | <u>GGAATCTCAGATCGGAAGAGCGTCGTGTAGGGAAAGAG</u>                  | <i>Mmel</i> Tnseq adapter                  | Adapter704         |
| oKrmit-Tnseq2                                                                          | CAAGCAGAAGACGGCATAACGAAAGCGCCTACGAGGAATTTGTATCG                | PCR of <i>Krmit</i> insertion tags         |                    |
| oAdapterPCR                                                                            | AATGATACGGCGACCACCGAGATCACACTCTTCCCTACACGACGCTCTTCC            | PCR of <i>Krmit</i> insertion tags         |                    |
| <b>Production of pCRS-based vectors for allelic exchange in the <i>scfAB</i> locus</b> |                                                                |                                            |                    |
| oKmF                                                                                   | ATGGCTAAAATGAGAATATCACC                                        | promoterless <i>aphA3</i> ORF              |                    |
| oKmR                                                                                   | CTAAAACAATTCATCCAGTAAAATA                                      | promoterless <i>aphA3</i> ORF              |                    |
| oAX0478.1                                                                              | ccc <u>GGATCCC</u> GTAAGTACTGATCTGTCAGTTTTTCC                  | DNA sequence upstream of <i>scfA</i>       | <i>Bam</i> HI      |
| oAX0478.2                                                                              | <b>GGTGATATTCTCATT</b> TTTAGCCATTTCACCATATCCTTTCTAGATGATAAAAAG | DNA sequence upstream of <i>scfA</i>       | <i>aphA3</i> -tail |
| oAX0478.3                                                                              | <b>TATTTTACTGGATGAATTGTTTTAG</b> ATATATGTCCAACTCGTGTGTTG       | DNA sequence downstream of <i>scfA</i>     | <i>aphA3</i> -tail |
| oAX0478.4                                                                              | ccc <u>GGATCC</u> ATTTTTCAGTGGTAATGGTGACC                      | DNA sequence downstream of <i>scfA</i>     | <i>Bam</i> HI      |
| oAX0478.V1                                                                             | TAATGGGAACAAGCCTGCTTCACG                                       | <i>PscfA-aphA3</i> junction genotyping     |                    |
| oAX0478.V2                                                                             | GTGAATAATGCCGAAGCGG                                            | <i>PscfA-aphA3</i> junction genotyping     |                    |
| oKmV1                                                                                  | TAGCAGGAGACATTCTTCC                                            | <i>PscfA-aphA3</i> junction genotyping     |                    |
| oKmV2                                                                                  | TCGAGCTATTTTTTGACTTACTGG                                       | <i>scfA</i> downstream junction genotyping |                    |
| oAX0477.1                                                                              | ccc <u>GGATCC</u> GGTTCAAAAATACCTACCTAAGC                      | DNA sequence upstream of <i>scfB</i>       | <i>Bam</i> HI      |

**Table S5. Primers used in this study (continued).**

| Name and purpose                                                                                                                                      | Sequence (5' - 3') (with underlined feature)                            | Role                                           | Feature            |
|-------------------------------------------------------------------------------------------------------------------------------------------------------|-------------------------------------------------------------------------|------------------------------------------------|--------------------|
| <b>Production of pCRS-based vectors for allelic exchange in the <i>scfAB</i> locus</b>                                                                |                                                                         |                                                |                    |
| oAX0477.2                                                                                                                                             | <b>GGTGATATTCTCATT</b> <u>TTTAGCC</u> ATATAGCCAGCTAAAAATAAAAAGCG        | DNA sequence upstream of <i>scfB</i>           | <i>aphA3</i> -tail |
| oAX0477.3                                                                                                                                             | <b>TATTTTACTGGATGAATTG</b> <u>TTTTAG</u> AGACTAATAAAAAAGCACTTGTTTTTTATC | DNA sequence downstream of <i>scfB</i>         | <i>aphA3</i> -tail |
| oAX0477.4                                                                                                                                             | ccc <u>GGATCC</u> GATATACTTGCTGCGCATGC                                  | DNA sequence downstream of <i>scfB</i>         | <i>Bam</i> HI      |
| oAX0477.V1                                                                                                                                            | CAATGGTTTGCGATTTTTATGTCC                                                | <i>scfB</i> - <i>aphA3</i> junction genotyping |                    |
| oAX0477.V2                                                                                                                                            | CTAAAAATGGATATTGATTTCACTTCAAAAGGC                                       | <i>scfB</i> downstream junction genotyping     |                    |
| <b>Verification of the expression of <i>scfA</i> and <i>scfB</i> in the <math>\Delta</math><i>scfA</i> and <math>\Delta</math><i>scfB</i> mutants</b> |                                                                         |                                                |                    |
| scfA M1T1 RT L                                                                                                                                        | CGCATTCTGTTTGGAAACCT                                                    |                                                |                    |
| scfA M1T1 RT R                                                                                                                                        | TTTTTCCAAAAAGCGGTTG                                                     |                                                |                    |
| scfB M1T1 RT L                                                                                                                                        | CAAGGCTGACGAGTCCTTT                                                     |                                                |                    |
| scfB M1T1 RT R                                                                                                                                        | CAGAAACCGTGGTGAATC                                                      |                                                |                    |
