# Supplementary material for: Genome-wide discovery of novel M1T1 group A streptococcal determinants important for fitness and virulence during soft-tissue infection
Source: PLoS Pathog. 2017 Aug 23;13(8):e1006584. doi: 10.1371/journal.ppat.1006584 (PMC5584981; doi:10.1371/journal.ppat.1006584)
Supplement: S2 Table — (XLSX) [file ppat.1006584.s008.xlsx]

## Sheet: Sheet1
S2 Table. Tn-seq analysis of the GAS 5448 genetic requirements for in vivo growth during subcutaneous infection after 12, 24 and 48 HPI.
		Fitness in vivo, 12h			Fitness in vivo, 24h			Fitness in vivo, 48h
Locus tag		log2(FC)	p value		log2(FC)	p value		log2(FC)	p value		Start	Stop	Strand	Protein product		MGAS5005 homolog	Gene name		Putative function	Essentiality
SP5448_RS00005		0.0005875	0.9996		-0.2281	0.8435		-0.03683	0.9732		232	1587	+	WP_002987659.1		M5005_Spy_0001	dnaA		chromosomal replication initiator protein	E
SP5448_RS00010		0.151	0.8953		-0.0599	0.9587		0.7455	0.4983		1742	2878	+	WP_010921762.1		M5005_Spy_0002	dnaN		DNA polymerase III beta chain	E
SP5448_RS00015		-0.7258	0.529		-0.711	0.541		-0.6466	0.5579		2953	3150	+	WP_002981933.1		M5005_Spy_0003			hypothetical cytosolic protein	NE
SP5448_RS00020		-1.086	0.3031		-3.803	0.0004112		-2.077	0.06269		3480	4595	+	WP_010921763.1		M5005_Spy_0004			GTP-binding protein	NE
SP5448_RS00025		0.3222	0.7762		0	1		0.7022	0.5201		4665	5234	+	WP_002981924.1		M5005_Spy_0005	pth		peptidyl-tRNA hydrolase	NC
SP5448_RS00030		-0.2936	0.6812		-0.1514	0.8331		-0.2548	0.7458		5237	8740	+	WP_010921764.1		M5005_Spy_0006	trcF		transcription-repair coupling factor	NE
SP5448_RS00035		-0.5291	0.6402		-0.7859	0.4822		0.9846	0.3883		8902	9174	+	WP_002987671.1		M5005_Spy_0007			heat shock protein 15	NE
SP5448_RS00040		1.184	0.2994		0	1		0	1		9161	9532	+	WP_002981918.1		M5005_Spy_0008	divIC		cell division protein	NE
SP5448_RS00045		-0.8637	0.4165		-2.013	0.05548		0.07503	0.9452		9667	10953	+	WP_010921766.1		M5005_Spy_0010			beta-lactamase	NE
SP5448_RS00050		0	1		0	1		0.8945	0.4126		10950	12236	+	WP_010921767.1		M5005_Spy_0011	tilS		tRNA(Ile)-lysidine synthetase	E
SP5448_RS00055		0	1		0	1		0.6935	0.5253		12241	12783	+	WP_002981912.1		M5005_Spy_0012			hypoxanthine-guanine phosphoribosyltransferase	NC
SP5448_RS00060		0.6639	0.6022		0.0619	0.9609		1.487	0.2151		12805	14784	+	WP_010921768.1		M5005_Spy_0013	ftsH		cell division protein	E
SP5448_RS00065		-0.8396	0.4401		-3.323	0.002109		-1.74	0.118		15109	16500	+	WP_002987685.1		M5005_Spy_0014			amino acid permease	NE
SP5448_RS00175		0.6404	0.5727		0	1		0	1		25163	26359	+	WP_010921769.1		M5005_Spy_0017	cdhA		CHAP-domain-containing cell wall hydrolase; pcsB/sibA homolog	E
SP5448_RS00180		0	1		0.4013	0.7258		0	1		26612	27574	+	WP_002986722.1		M5005_Spy_0018	prsA.2		ribose-phosphate pyrophosphokinase	E
SP5448_RS00185		-1.154	0.3781		-1.345	0.2974		-1.312	0.2841		27760	28515	+	WP_002986719.1		M5005_Spy_0019	recO		DNA repair protein	NE
SP5448_RS00190		0	1		0	1		0.6935	0.5253		28618	29625	+	WP_002987696.1		M5005_Spy_0020	plsX		fatty acid/phospholipid synthesis protein	E
SP5448_RS00195		0.3521	0.7561		0	1		0.7217	0.5086		29618	29860	+	WP_010921770.1		M5005_Spy_0021	acpP.2		acyl carrier protein	NC
SP5448_RS00200		-0.2244	0.848		-0.7498	0.5159		0.9072	0.4348		30011	30715	+	WP_015055882.1		M5005_Spy_0022			phosphoribosylaminoimidazole-succinocarboxamide synthase	NC
SP5448_RS00205		-0.1917	0.8285		0.3602	0.6821		2.045	0.03029		30839	34564	+	WP_015055883.1		M5005_Spy_0023			phosphoribosylformylglycinamidine synthase	NE
SP5448_RS00210		0.2329	0.6998		0.4366	0.4752		0.7498	0.267		34725	36179	+	WP_010921773.1		M5005_Spy_0024	purF		amidophosphoribosyltransferase	NE
SP5448_RS00215		-0.05992	0.9541		0.1032	0.9197		-3.926	0.0003027		36207	37229	+	WP_010921774.1		M5005_Spy_0025	purM		phosphoribosylformylglycinamidine cyclo-ligase	NE
SP5448_RS00220		-0.6843	0.5672		-1.206	0.3059		0.3535	0.7647		37397	37951	+	WP_010921775.1		M5005_Spy_0026	purN		phosphoribosylglycinamide formyltransferase	NE
SP5448_RS00225		0.3416	0.7573		0.3756	0.7285		2.706	0.01552		38135	39682	+	WP_011285343.1		M5005_Spy_0027			phosphoribosylaminoimidazolecarboxamide formyltransferase/IMP cyclohydrolase	NE
SP5448_RS00230		0.3036	0.7565		0.03649	0.97		1.088	0.2896		39740	40864	-	WP_010921776.1		M5005_Spy_0028			autolysin	NE
SP5448_RS00235		0.6398	0.4445		-0.1821	0.8275		0.2213	0.8071		41117	42382	+	WP_010921777.1		M5005_Spy_0029	purD		phosphoribosylamine--glycine ligase	NE
SP5448_RS00240		-1.134	0.3587		0.7039	0.5571		0.8765	0.4652		42660	43151	+	WP_015055884.1		M5005_Spy_0030	purE		phosphoribosylaminoimidazole carboxylase catalytic subunit	NE
SP5448_RS00245		-0.2804	0.7812		1.534	0.1238		-0.1793	0.8654		43138	44211	+	WP_015055885.1		M5005_Spy_0031	purK		phosphoribosylaminoimidazole carboxylase ATPase subunit	NE
SP5448_RS00250		-0.2045	0.7527		0.5555	0.3967		0.599	0.406		44238	45881	+	WP_010921779.1		M5005_Spy_0032			hypothetical protein	NE
SP5448_RS00255		-0.213	0.8076		-1.662	0.05924		-0.7859	0.4189		45899	47191	+	WP_010921780.1		M5005_Spy_0033	purB		adenylosuccinate lyase	NE
SP5448_RS00260		0.2211	0.8065		0.2556	0.7756		2.064	0.03172		47323	48234	+	WP_002986681.1		M5005_Spy_0034			transcriptional regulator	NE
SP5448_RS00265		-1.459	0.2686		-1.752	0.1766		-0.9508	0.4419		48460	49458	+	WP_002986679.1		M5005_Spy_0035	ruvB		holliday junction DNA helicase	NE
SP5448_RS00270		-0.2785	0.7303		-0.01337	0.9868		-0.3575	0.6906		49596	50033	+	WP_002994668.1		M5005_Spy_0036			protein tyrosine phosphatase	NE
SP5448_RS00275		0	1		0	1		0	1		50056	50457	+	WP_010921781.1		M5005_Spy_0037			hypothetical membrane associated protein	NC
SP5448_RS00280		-1.027	0.3771		-0.6788	0.5626		-0.5636	0.6122		50454	52229	+	WP_010921782.1		M5005_Spy_0038			acyltransferase family	E
SP5448_RS00285		-0.8599	0.4447		-0.5022	0.651		0.4259	0.7076		52538	55180	+	WP_011285347.1		M5005_Spy_0039	adh2		alcohol dehydrogenase/acetaldehyde dehydrogenase (acetylating)	NE
SP5448_RS00290		0.1346	0.8619		-0.4975	0.5208		0.3841	0.6481		55432	56448	+	WP_010921783.1		M5005_Spy_0040	adhA		alcohol dehydrogenase	NE
SP5448_RS00295		0.4204	0.5408		0.5711	0.4095		0.3837	0.6131		56836	58128	+	WP_010921784.1		M5005_Spy_0041			Na+ driven multidrug efflux pump	NE
SP5448_RS00300		0.5412	0.6355		0.05629	0.961		0.2571	0.8144		58329	58637	+	WP_001284518.1		M5005_Spy_0043	rpsJ		SSU ribosomal protein S10P	E
SP5448_RS00305		0	1		0.4013	0.7258		0	1		58853	59479	+	WP_002986659.1		M5005_Spy_0044	rplC		LSU ribosomal protein L3P	E
SP5448_RS00310		0	1		0	1		0	1		59503	60126	+	WP_002986657.1		M5005_Spy_0045	rplD		LSU ribosomal protein L1E	E
SP5448_RS00315		0	1		0	1		0	1		60126	60422	+	WP_002986656.1		M5005_Spy_0046	rplW		LSU ribosomal protein L23P	NE
SP5448_RS00320		0	1		0	1		0	1		60440	61273	+	WP_002986654.1		M5005_Spy_0047	rplB		LSU ribosomal protein L2P	E
SP5448_RS00325		0	1		0	1		0	1		61412	61690	+	WP_000533765.1		M5005_Spy_0048	rpsS		SSU ribosomal protein S19P	C
SP5448_RS00330		0	1		0	1		0	1		61706	62050	+	WP_002986651.1		M5005_Spy_0049	rplV		LSU ribosomal protein L22P	E
SP5448_RS00335		0	1		0	1		0	1		62063	62716	+	WP_000529929.1		M5005_Spy_0050	rpsC		SSU ribosomal protein S3P	E
SP5448_RS00340		0	1		0	1		0	1		62720	63133	+	WP_002986644.1		M5005_Spy_0051	rplP		LSU ribosomal protein L16P	E
SP5448_RS00345		0	1		0	1		0	1		63143	63349	+	WP_000775731.1		M5005_Spy_0052	rpmC		LSU ribosomal protein L29P	NE
SP5448_RS00350		0	1		0	1		0	1		63375	63635	+	WP_000440811.1		M5005_Spy_0053	rpsQ		SSU ribosomal protein S17P	NC
SP5448_RS00355		0.2311	0.8384		0.403	0.7249		0	1		63660	64028	+	WP_000615920.1		M5005_Spy_0054	rplN		LSU ribosomal protein L14P	C
SP5448_RS00360		0	1		0	1		0	1		64107	64412	+	WP_010921786.1		M5005_Spy_0055	rplX		LSU ribosomal protein L24P	NC
SP5448_RS00365		0	1		0	1		1.096	0.3157		64436	64978	+	WP_002986634.1		M5005_Spy_0056	rplE		LSU ribosomal protein L5P	NC
SP5448_RS00370		0	1		0	1		0	1		64994	65179	+	WP_002987746.1		M5005_Spy_0057	rpsN		SSU ribosomal protein S14P	NC
SP5448_RS00375		0	1		0	1		0	1		65330	65728	+	WP_002987748.1		M5005_Spy_0058	rpsH		SSU ribosomal protein S8P	NC
SP5448_RS00380		0	1		0.7509	0.5129		0	1		65931	66467	+	WP_002986629.1		M5005_Spy_0059	rplF		LSU ribosomal protein L6P	E
SP5448_RS00385		0	1		0	1		0	1		66563	66928	+	WP_002986627.1		M5005_Spy_0060	rplR		LSU ribosomal protein L18P	NC
SP5448_RS00390		0	1		0	1		0	1		66947	67441	+	WP_002986625.1		M5005_Spy_0061	rpsE		SSU ribosomal protein S5P	E
SP5448_RS00395		0	1		0	1		0	1		67456	67638	+	WP_002986624.1		M5005_Spy_0062	rpmD		LSU ribosomal protein L30P	E
SP5448_RS00400		0.3142	0.7844		-0.2462	0.8315		-0.09509	0.9311		67852	68292	+	WP_002986622.1		M5005_Spy_0063	rplO		LSU ribosomal protein L15P	NE
SP5448_RS00405		-0.373	0.7426		-0.0642	0.9554		0.05349	0.961		68309	69613	+	WP_002986618.1		M5005_Spy_0064	secY		protein translocase subunit	E
SP5448_RS00410		-0.4298	0.7086		-0.4331	0.709		-0.346	0.7535		69763	70401	+	WP_010921787.1		M5005_Spy_0065	adk		adenylate kinase	NC
SP5448_RS00415		0	1		0	1		0	1		70519	70737	+	WP_001040189.1		M5005_Spy_0066	infA		bacterial protein translation initiation factor 1	E
SP5448_RS00420		0	1		0	1		0	1		70897	71262	+	WP_002986615.1		M5005_Spy_0068	rpsM		SSU ribosomal protein S13P	E
SP5448_RS00425		0	1		0	1		0	1		71280	71663	+	WP_010921788.1		M5005_Spy_0069	rpsK		SSU ribosomal protein S11P	E
SP5448_RS00430		0	1		0	1		0	1		71709	72647	+	WP_002986607.1		M5005_Spy_0070	rpoA		DNA-directed RNA polymerase alpha chain	E
SP5448_RS00435		0	1		0	1		0	1		72662	73048	+	WP_002986602.1		M5005_Spy_0071	rplQ		LSU ribosomal protein L17P	E
SP5448_RS00520		-0.3271	0.7755		0.02101	0.9855		-0.1207	0.9127		80292	80477	+	WP_010921789.1		M5005_Spy_0073			hypothetical protein	NC
SP5448_RS00530		1.546	0.2064		-0.7736	0.5229		-1.723	0.1598		81476	81688	+	WP_015055890.1		M5005_Spy_0076			4-diphosphocytidyl-2-C-methyl-D-erythritol kinase	NC
SP5448_RS00535		0.2283	0.8471		2.44	0.03517		0.5852	0.6221		81798	82241	+	WP_010921790.1		M5005_Spy_0077	adcR		transcriptional regulator, MarR family; metals, Zn	NE
SP5448_RS00540		-0.2921	0.7498		-5.419	6.111e-08		-4.985	6.824e-06		82245	82964	+	WP_010921791.1		M5005_Spy_0078	adcC		high-affinity zinc uptake system ATP-binding protein	NE
SP5448_RS00545		-0.1459	0.889		-2.692	0.01072		-1.025	0.3539		82957	83772	+	WP_010921792.1		M5005_Spy_0079	adcB		high-affinity zinc uptake system membrane protein	NE
SP5448_RS00550		0.617	0.5504		0.7237	0.4774		1.276	0.2322		83812	84195	-	WP_010921793.1		M5005_Spy_0080			bis(5'-nucleosyl)-tetraphosphatase (asymmetrical)	NE
SP5448_RS00555		-1.118	0.3884		-1.999	0.1163		-1.645	0.1854		84246	85502	-	WP_010921794.1		M5005_Spy_0081	tyrS		tyrosyl-tRNA synthetase	E
SP5448_RS00560		0.08233	0.9158		0.1022	0.8958		-0.1386	0.8706		85606	87906	+	WP_015055892.1		M5005_Spy_0082	pbp1b		multimodular transpeptidase-transglycosylase PBP 1B	NE
SP5448_RS00565		-0.694	0.5467		-0.568	0.625		0.2697	0.8072		88170	91736	+	WP_010921796.1		M5005_Spy_0083	rpoB		DNA-directed RNA polymerase beta chain	E
SP5448_RS00570		-0.9768	0.3845		-0.3205	0.7707		0.3536	0.7575		91827	95468	+	WP_010921797.1		M5005_Spy_0084	rpoC		DNA-directed RNA polymerase beta' chain	E
SP5448_RS00575		-0.5494	0.5955		-0.4579	0.6557		0.5685	0.5968		95620	95985	+	WP_002986560.1		M5005_Spy_0085			putative DNA binding protein	NE
SP5448_RS00580		-0.8149	0.4827		1.409	0.2139		-3.106	0.009218		96078	97016	+	WP_010921798.1		M5005_Spy_0086	comYA		comG operon protein 1	NE
SP5448_RS00585		-0.7819	0.3414		-0.8709	0.289		1.017	0.2545		97000	97986	+	WP_002986555.1		M5005_Spy_0087	comYB		comG operon protein 2	NE
SP5448_RS00590		-0.4586	0.7011		-0.3322	0.7773		1.293	0.2704		97988	98314	+	WP_002986552.1		M5005_Spy_0088	comYC		comG operon protein 3	NE
SP5448_RS00595		0.264	0.801		-0.9018	0.3821		0.3905	0.7172		98289	98717	+	WP_002986548.1		M5005_Spy_0089			comG operon protein 4	NE
SP5448_RS00600		-1.162	0.323		-0.9885	0.3926		0.2547	0.8279		98674	98958	+	WP_002987779.1		M5005_Spy_0090			hypothetical protein	NE
SP5448_RS00605		-1.034	0.2807		-0.7087	0.4578		-0.8571	0.4165		98951	99385	+	WP_010921800.1		M5005_Spy_0091	comYD		comG operon protein 6	NE
SP5448_RS00610		-0.8434	0.2543		-0.04999	0.9464		1.391	0.09294		99369	99695	+	WP_010921801.1		M5005_Spy_0092			comG operon protein 6	NE
SP5448_RS00615		0.1454	0.8662		1.011	0.2397		1.798	0.05237		99793	100746	+	WP_010921802.1		M5005_Spy_0093			adenine-specific methyltransferase	NE
SP5448_RS00620		-1.919	0.1468		-2.256	0.08186		-1.385	0.2656		100805	102001	+	WP_010921803.1		M5005_Spy_0094	ackA		acetate kinase	NE
SP5448_RS00625		0.2309	0.803		-0.41	0.6559		-0.1389	0.8882		102188	102496	+	WP_010921804.1		M5005_Spy_0095			hypothetical protein	NE
SP5448_RS00630		0.2634	0.7305		-1.023	0.1862		1.294	0.1411		102579	103349	-	WP_010921805.1		M5005_Spy_0096	proC		pyrroline-5-carboxylate reductase	NE
SP5448_RS00635		0.5502	0.5512		0.1657	0.8572		-3.99	0.0002755		103397	104464	-	WP_010921806.1		M5005_Spy_0097	pepA		glutamyl aminopeptidase	NE
SP5448_RS00640		0.176	0.8515		0.6839	0.4634		1.199	0.2298		104920	105213	+	WP_002986518.1		M5005_Spy_0099			hypothetical membrane associated protein	NE
SP5448_RS00645		0.3567	0.762		-0.8892	0.4447		0.3638	0.7563		105210	105527	+	WP_011285355.1		M5005_Spy_0100			thioredoxin	NE
SP5448_RS00650		0.757	0.4819		0.1835	0.8628		1.205	0.2742		105545	106171	+	WP_011285356.1		M5005_Spy_0101			tRNA binding domain protein	NE
SP5448_RS00655		0.3956	0.7016		-0.6826	0.5072		-1.352	0.2225		106323	106718	+	WP_003053955.1		M5005_Spy_0102			single-strand DNA binding protein	NE
SP5448_RS00660		0.03436	0.9746		0.333	0.7554		-1.628	0.1629		106978	107619	-	WP_010921807.1		M5005_Spy_0103			deoxyadenosine kinase/deoxyguanosine kinase	NE
SP5448_RS00665		-0.7481	0.5178		-1.283	0.2609		-0.296	0.7982		107639	108616	-	WP_002987812.1		M5005_Spy_0104			tRNA-dihydrouridine synthase	NE
SP5448_RS00670		-0.9797	0.3765		-2.689	0.01321		0.2996	0.7891		108603	109475	-	WP_010921808.1		M5005_Spy_0105			33 kDa chaperonin	NE
SP5448_RS00675		0.01401	0.9877		1.165	0.1967		2.442	0.01133		109622	111115	-	WP_010921809.1		M5005_Spy_0106	rofA		Ralp1; Regulator of protein F; PCVR	NE
SP5448_RS00680		0.7198	0.406		0.7316	0.3962		2.682	0.003795		111378	113651	+	WP_015055896.1		M5005_Spy_0107	cpa		fibronectin-binding protein; FCT Pilus Region	NE
SP5448_RS00685		-0.4805	0.6328		-0.08895	0.929		1.607	0.1286		113644	114201	+	WP_011285358.1		M5005_Spy_0108	sipA1		signal peptidase I; FCT Pilus Region	NE
SP5448_RS00690		0.3886	0.653		0.1921	0.8236		2.896	0.001857		114234	115256	+	WP_010921811.1		M5005_Spy_0109			fibronectin-binding protein; FCT Pilus Region	NE
SP5448_RS00695		1.205	0.2276		1.274	0.1961		1.44	0.1653		115266	115979	+	WP_010921812.1		M5005_Spy_0110	srtC2		hypothetical protein	NE
SP5448_RS00700		0.8515	0.3443		0.6702	0.4556		2.058	0.03453		116001	116648	+	WP_010921813.1		M5005_Spy_0111			hypothetical protein	NE
SP5448_RS00705		-0.09708	0.9147		0.08704	0.923		1.058	0.2715		116835	118157	-	WP_011285359.1		M5005_Spy_0112			transposase	NE
SP5448_RS00710		0.02993	0.9799		-0.3825	0.7481		-0.3112	0.7826		118120	118347	-	WP_015055898.1
SP5448_RS00715		-1.022	0.2915		-1.211	0.2097		1.185	0.248		118398	118748	-	WP_010921815.1		M5005_Spy_0113			transposase	NE
SP5448_RS00720		-0.3664	0.6054		-0.9619	0.1784		-0.01252	0.9875		119052	119807	+	WP_010921816.1		M5005_Spy_0114	srtB		sortase; FCT Pilus Region	NE
SP5448_RS00725		-0.7699	0.4804		0.2434	0.821		-0.6122	0.5903		120001	120666	-	WP_010921817.1		M5005_Spy_0115			hypothetical protein	NE
SP5448_RS00730		0.3229	0.7732		-0.4663	0.6738		1.826	0.1054		121015	122421	+	WP_011285360.1		M5005_Spy_0116	atoE		short-chain fatty acids transporter	NE
SP5448_RS00735		0.7615	0.5006		1.374	0.214		1.138	0.3171		122489	122884	-	WP_011285361.1
SP5448_RS00740											122980	123399	-	WP_011285362.1
SP5448_RS00745		-0.04596	0.9671		-0.598	0.5854		1.548	0.1692		123520	124704	+	WP_010921819.1		M5005_Spy_0119			acetyl-CoA acetyltransferase	NE
SP5448_RS00750		0.6512	0.5188		1.112	0.2648		0.6824	0.5194		124716	125375	+	WP_010921820.1		M5005_Spy_0120	atoD.2		acetate CoA-transferase alpha subunit	NE
SP5448_RS00755		0.4244	0.6483		0.5752	0.5329		1.109	0.259		125378	126025	+	WP_002987854.1		M5005_Spy_0121			acetyl-CoA:acetoacetyl-CoA transferase beta subunit	NE
SP5448_RS00760		0.4104	0.6775		0.9274	0.341		2.719	0.008154		126147	126827	-	WP_002986450.1		M5005_Spy_0122	serR		serine catabolism regulator	NE
SP5448_RS00765		0.006174	0.9946		-1.274	0.1616		-0.6824	0.4827		127001	127366	+	WP_002986446.1		M5005_Spy_0123			translation initiation inhibitor	NE
SP5448_RS00770		-0.28	0.6233		-0.7528	0.1931		-1.379	0.03187		127403	128422	+	WP_002986443.1		M5005_Spy_0124	sloR		transcriptional regulator; SerR-repressed	NE
SP5448_RS00775		0.1322	0.8846		-0.4595	0.6116		0.3868	0.6906		128877	129197	+	WP_002986440.1		M5005_Spy_0125			hypothetical protein	NE
SP5448_RS00780		0.03407	0.9717		1.186	0.2114		-0.4495	0.6553		129187	131208	+	WP_011285363.1		M5005_Spy_0126	ntpI		V-type sodium ATP synthase subunit I; SerR-repressed	NE
SP5448_RS00785		-0.838	0.429		-0.9837	0.3494		-1.829	0.1096		131210	131689	+	WP_002993834.1		M5005_Spy_0127	ntpK		V-type sodium ATP synthase subunit K; SerR-repressed	NE
SP5448_RS00790		-0.3154	0.7274		-1.934	0.03634		-1.08	0.295		131757	132341	+	WP_002986431.1		M5005_Spy_0128	ntpE		V-type sodium ATP synthase subunit E; SerR-repressed	NE
SP5448_RS00795		-0.4484	0.5577		0.298	0.6975		-0.4457	0.5928		132357	133355	+	WP_010921822.1		M5005_Spy_0129	ntpC		V-type ATP synthase subunit C; SerR-repressed	NE
SP5448_RS00800		-0.2816	0.7935		0.03128	0.9765		-0.4951	0.6615		133352	133672	+	WP_011285364.1		M5005_Spy_0130	ntpF		V-type sodium ATP synthase subunit F; SerR-repressed	NE
SP5448_RS00805		-0.2487	0.7921		0.3829	0.682		-0.03983	0.9682		133873	135648	+	WP_010921823.1		M5005_Spy_0131	ntpA		V-type sodium ATP synthase subunit A; SerR-repressed	NE
SP5448_RS00810		-0.1652	0.8662		-0.8494	0.3805		2.031	0.04716		135649	137064	+	WP_002986419.1		M5005_Spy_0132	ntpB		V-type sodium ATP synthase subunit B; SerR-repressed	NE
SP5448_RS00815		0.3799	0.7064		-0.2819	0.7794		-2.148	0.05676		137109	137735	+	WP_010921824.1		M5005_Spy_0133	ntpD		V-type sodium ATP synthase subunit D; SerR-repressed	NE
SP5448_RS00820		0.05445	0.9497		-0.6418	0.4565		0.08732	0.9256		137855	139117	-	WP_010921825.1		M5005_Spy_0134			tellurite resistance protein	NE
SP5448_RS00825		0.2778	0.7991		1.14	0.2863		0.3345	0.763		139130	140008	-	WP_010921826.1		M5005_Spy_0135			hypothetical membrane associated protein	NE
SP5448_RS00830		0.5699	0.5259		0.0196	0.9826		0.1462	0.8821		140446	141738	+	WP_002987876.1		M5005_Spy_0136	purA		adenylosuccinate synthetase	NE
SP5448_RS00835		1.217	0.09419		1.067	0.1458		-0.5016	0.5494		142065	143108	+	WP_002987878.1		M5005_Spy_0137			nucleoside-binding protein	NE
SP5448_RS00840		1.113	0.3899		1.187	0.3493		-0.04466	0.9714		143281	143820	+	WP_002987881.1		M5005_Spy_0138	nusG		transcription antitermination protein	C
SP5448_RS00845		0.4845	0.6171		-0.9512	0.3215		-0.9606	0.3459		144191	145546	+	WP_015055903.1		M5005_Spy_0139	nga/spn		NAD glycohydrolase	NE
SP5448_RS00850		-1.459	0.2078		-2.879	0.01136		-2.359	0.04159		145551	146036	+	WP_002987884.1		M5005_Spy_0140	ifs		NAD glycohydrolase inhibitor	NE
SP5448_RS00855		-0.1216	0.8488		-1.297	0.04409		-1.715	0.01587		146051	147775	+	WP_002987886.1		M5005_Spy_0141	slo		streptolysin O	NE
SP5448_RS00860		-0.5257	0.515		-0.3819	0.636		0.1461	0.8673		148030	148461	+	WP_002987887.1		M5005_Spy_0142			hypothetical protein	NE
SP5448_RS00865		-0.14	0.9154		0.06634	0.959		1.101	0.3764		148647	148883	-	WP_011285366.1		M5005_Spy_0143			hypothetical protein	NE
SP5448_RS00870		0.03563	0.9755		-0.3086	0.7877		-1.206	0.3131		149639	149848	+	WP_002987895.1		M5005_Spy_0145			hypothetical protein	NE
SP5448_RS00875		0.894	0.3133		1.129	0.2		1.523	0.1071		150416	151555	+	WP_015055905.1		M5005_Spy_0146	metB		cystathionine beta-lyase	NE
SP5448_RS00880		3.24	0.0132		0.4888	0.7036		0	1		151766	154267	+	WP_002987902.1		M5005_Spy_0147	leuS		leucyl-tRNA synthetase	E
SP5448_RS00885		-0.3828	0.6651		0.2066	0.8142		-0.1209	0.8978		154574	156007	+	WP_009880700.1		M5005_Spy_0148	ptxC		PTS system, 3-keto-L-gulonate specific IIC	NC
SP5448_RS00890		-0.2319	0.8221		-0.636	0.535		1.563	0.1448		156078	156356	+	WP_002986367.1		M5005_Spy_0149	ptxB		PTS system, 3-keto-L-gulonate specific IIB	NE
SP5448_RS00895		0.5832	0.5164		0.8345	0.3497		0.8206	0.3901		156479	156964	+	WP_011285369.1		M5005_Spy_0150	ptxA		PTS system, 3-keto-L-gulonate specific IIA	NE
SP5448_RS00900		-0.1203	0.9212		-1.361	0.2578		2.719	0.02124		157055	157717	+	WP_002987907.1		M5005_Spy_0151			3-keto-L-gulonate-6-phosphate decarboxylase	NE
SP5448_RS00905		-0.471	0.5981		-1.155	0.1932		0.2978	0.7538		157722	158585	+	WP_002987909.1		M5005_Spy_0152			L-xylulose 5-phosphate 3-epimerase	NE
SP5448_RS00910		-0.4372	0.6052		-0.2977	0.7239		-1.315	0.1482		158587	159291	+	WP_002987910.1		M5005_Spy_0153	araD		L-ribulose-5-phosphate 4-epimerase	NE
SP5448_RS00915		0.8369	0.2139		1.132	0.09537		1.335	0.07343		159616	161262	+	WP_002987912.1		M5005_Spy_0155			transcription antiterminator, BglG family	NE
SP5448_RS00920		0.8066	0.3773		1.282	0.1577		1.685	0.08273		161515	162606	+	WP_002986347.1		M5005_Spy_0156			metal-dependent hydrolase	NE
SP5448_RS00925		0.2745	0.7513		-0.5488	0.5299		-0.7854	0.4324		163094	164290	+	WP_002986345.1		M5005_Spy_0157	opuAA		glycine betaine transport ATP-binding protein	NE
SP5448_RS00930		0.1775	0.8771		0.6014	0.5918		-0.6091	0.5967		164306	166033	+	WP_002987913.1		M5005_Spy_0158	opuABC		glycine betaine transport system permease protein	NE
SP5448_RS00935		-1.961	0.06546		-3.886	0.0002684		-1.969	0.0736		166164	168806	+	WP_002987915.1		M5005_Spy_0159	polA		DNA polymerase I	E
SP5448_RS00940		0.3082	0.7526		1.396	0.1498		1.768	0.09231		168993	169448	+	WP_002987917.1		M5005_Spy_0160			CoA binding protein	NE
SP5448_RS00945		-1.332	0.2709		-2.405	0.04328		-2.267	0.05687		169500	169967	+	WP_002987920.1		M5005_Spy_0161	perR		ferric uptake regulation protein	NE
SP5448_RS00950		0.003971	0.9961		-0.411	0.6148		0.3246	0.7161		170124	170423	+	WP_002987921.1		M5005_Spy_0162	vlg		trans-acting positive regulator Mry	NE
SP5448_RS00955		0.4704	0.3662		1.384	0.00894		2.135	0.0002846		170645	171979	+	WP_002987923.1		M5005_Spy_0163			3'-phosphoadenosine 5'-phosphosulfate sulfotransferase	NE
SP5448_RS00960		-0.5306	0.4793		-0.6987	0.3533		1.083	0.1871		171972	172502	+	WP_002987925.1		M5005_Spy_0164			parB-like nuclease	NE
SP5448_RS00965		1.052	0.1382		0.5661	0.4287		1.619	0.04422		172522	172704	+	WP_014635254.1		M5005_Spy_0165			transposase	NE
SP5448_RS00970		-0.8323	0.4524		-1.135	0.2982		1.617	0.1488		172831	173010	-	WP_015055908.1		M5005_Spy_0166			transposase	NE
SP5448_RS00975		1.235	0.3485		1.09	0.4002		2.259	0.06789		173086	173655	-	WP_002987931.1		M5005_Spy_0167			transposase	NE
SP5448_RS00980		-0.8344	0.5264		-0.5002	0.6996		-1.05	0.3943		173688	173903	-	WP_002987933.1		M5005_Spy_0168			transposase	NE
SP5448_RS00985		0.07002	0.9191		-0.05824	0.9332		-1.098	0.149		174059	175369	-	WP_002987935.1		M5005_Spy_0169			malonate permease	NE
SP5448_RS00990		-0.4025	0.6342		-0.7	0.4085		-0.4726	0.613		175593	176465	+	WP_002992869.1		M5005_Spy_0170	nadC		nicotinate-nucleotide pyrophosphorylase (carboxylating)	NE
SP5448_RS00995		0	1		0	1		0	1		176765	177571	-	WP_010921849.1		M5005_Spy_0171			transposase	NE
SP5448_RS01000		0	1		0	1		0	1		177592	178107	-	WP_011285371.1
SP5448_RS01005		-0.01852	0.9882		0.4093	0.7374		0.4457	0.7143		178193	179056	-	WP_010921851.1		M5005_Spy_0173			integral membrane protein	NE
SP5448_RS01010		-0.2743	0.8003		1.191	0.2664		2.394	0.03024		179275	180417	+	WP_010921852.1		M5005_Spy_0175	tgt		queuine tRNA-ribosyltransferase	NE
SP5448_RS01015		0.6362	0.5263		0.5001	0.6135		1.904	0.06778		180949	181488	+	WP_010921854.1		M5005_Spy_0177			bioY protein	NE
SP5448_RS01020		-0.3905	0.7138		-1.047	0.322		-1.472	0.1853		181628	182407	+	WP_010921855.1		M5005_Spy_0178			metal-dependent hydrolase	NE
SP5448_RS01025		-0.0139	0.9903		-0.03187	0.9779		0.07682	0.9441		182407	182922	+	WP_011285373.1		M5005_Spy_0179			tRNA-specific adenosine deaminase	NE
SP5448_RS01030		0.2912	0.7243		0.6126	0.4573		3.242	0.0002703		183536	184768	-	WP_010921856.1		M5005_Spy_0180			S-layer homology domain	NE
SP5448_RS01035		0.1373	0.8618		0.3235	0.6823		1.117	0.1994		185168	185872	+	WP_010921857.1		M5005_Spy_0182	speG		exotoxin type G precursor	NE
SP5448_RS01040		0.3171	0.7814		0.3701	0.7485		0.2687	0.8064		186328	187677	+	WP_010921858.1		M5005_Spy_0185	pgi		glucose-6-phosphate isomerase	E
SP5448_RS01045		0.2654	0.7579		0.2537	0.7673		2.692	0.003502		188026	189534	-	WP_010921859.1		M5005_Spy_0186	ralp4, rivR		RofA-like protein 4 (IV); Ralp4 transcr. regul., RivR-PCVR	NE
SP5448_RS01050		0	1		0	1		0	1		189980	190684	+	WP_032462296.1		M5005_Spy_0257			transposase	NE
SP5448_RS01055		0	1		0	1		0	1		190587	191102	+	WP_032461697.1
SP5448_RS01060		1.743	0.1874		0.2949	0.8203		-0.003514	0.9978		191107	191211	+	WP_010921860.1		M5005_Spy_0189			hypothetical protein	NC
SP5448_RS01065		0.2405	0.8232		0.6956	0.5117		0.1659	0.8807		191427	192098	+	WP_002991199.1		M5005_Spy_0191			integral membrane protein (rhomboid family)	NE
SP5448_RS01070		-0.5572	0.6609		-0.3944	0.7507		0.0681	0.9556		192197	193096	-	WP_002986125.1		M5005_Spy_0192	hasC.2		UTP--glucose-1-phosphate uridylyltransferase	NC
SP5448_RS01075		0	1		0	1		0	1		193129	194145	-	WP_002986123.1		M5005_Spy_0194	gapA		glycerol-3-phosphate dehydrogenase; GAPDH	E
SP5448_RS01080		-1.818	0.1228		-1.445	0.2108		-2.306	0.05426		194443	194892	+	WP_002986120.1		M5005_Spy_0195	pefR		Heme-sensitive transcriptional repressor, MarR-family	NE
SP5448_RS01085		0.7902	0.492		0.1806	0.8725		0.8505	0.4599		194885	196591	+	WP_010921864.1		M5005_Spy_0196	pefC		Heme efflux, MDR ABC transporter ATP-binding permease	NE
SP5448_RS01090		0.9608	0.1589		1.068	0.1203		1.106	0.1424		196594	198378	+	WP_010921865.1		M5005_Spy_0197	pefD		Heme efflux, MDR ABC transporter ATP-binding permease	NE
SP5448_RS01095		0.2197	0.7903		-0.07374	0.9288		0.8448	0.3433		198496	199263	+	WP_002986113.1		M5005_Spy_0198			hypothetical cytosolic protein	NE
SP5448_RS01100		-1.176	0.2989		-1.644	0.1424		-2.011	0.08757		199373	199819	+	WP_002986111.1		M5005_Spy_0199			deoxyuridine 5'-triphosphate nucleotidohydrolase	NE
SP5448_RS01105		0.03398	0.9717		0.2344	0.8046		-0.2211	0.8263		199900	201261	+	WP_010921866.1		M5005_Spy_0200	radA		DNA repair protein	NE
SP5448_RS01110		2.698	0.03817		-0.4793	0.7091		-0.5571	0.6557		201450	201947	+	WP_010921867.1		M5005_Spy_0201			carbonic anhydrase	C
SP5448_RS01115		0.3791	0.6774		-0.3969	0.662		-0.0979	0.9206		202078	202788	+	WP_011017311.1		M5005_Spy_0202			hypothetical protein	NE
SP5448_RS01120		0.7439	0.5185		0.856	0.4615		0	1		202970	204415	+	WP_002986105.1		M5005_Spy_0203	gltX		glutamyl-tRNA synthetase	E
SP5448_RS01125		-0.2921	0.6691		0.03661	0.9576		0.3521	0.641		204810	206156	+	WP_011285380.1		M5005_Spy_0204	fasB		TCS-1 histidine kinase FasB	NE
SP5448_RS01130		0.6002	0.4451		0.9273	0.2385		1.485	0.08191		206153	207436	+	WP_010921869.1		M5005_Spy_0205	fasC		TCS-1 histidine kinase FasC	NE
SP5448_RS01135		0.8282	0.3491		1.065	0.2257		1.915	0.04215		207443	208180	+	WP_021733119.1		M5005_Spy_0206	fasA		TCS-1 response regulator FasA	NE
SP5448_RS01140		0	1		0	1		0	1		208720	209079	+	WP_002992035.1		M5005_Spy_0207	fasX		regulatory RNA	C
SP5448_RS01145		0.6657	0.5721		-0.3048	0.7932		0.0993	0.9327		209063	209872	+	WP_011285381.1		M5005_Spy_0208			60 kDa inner membrane protein YIDC	NE
SP5448_RS01150		-2.178	0.0881		-2.617	0.03664		-2.924	0.01808		209884	210798	+	WP_010921872.1		M5005_Spy_0209			jag protein	NE
SP5448_RS01155		-0.1711	0.8799		0.01191	0.9917		0.2747	0.8014		211113	211247	+	WP_002885866.1		M5005_Spy_0211	rpmH		LSU ribosomal protein L34P	NC
SP5448_RS01160		0.3769	0.6579		0.1664	0.8445		0.2915	0.7503		211521	212225	+	WP_010921873.1		M5005_Spy_0212			N-acetylmannosamine-6-phosphate 2-epimerase	NE
SP5448_RS01165		0.8505	0.4413		-0.6664	0.5393		3.871	0.0005361		212274	213593	+	WP_010921874.1		M5005_Spy_0213			ABC Sialic Acid; N-acetylneuraminate-binding protein	NE
SP5448_RS01170		0.5617	0.5517		0.47	0.6163		0.8648	0.3906		213717	214583	+	WP_029714230.1		M5005_Spy_0214			ABC Sialic Acid; N-acetylneuraminate permease protein	NE
SP5448_RS01175		1.187	0.2132		-0.9234	0.3357		-2.098	0.05213		214596	215426	+	WP_009880516.1		M5005_Spy_0215			ABC Sialic Acid; N-acetylneuraminate permease protein	NE
SP5448_RS01180		0.1351	0.9137		-0.03341	0.978		2.912	0.01632		215583	216245	+	WP_010921876.1		M5005_Spy_0216			hypothetical membrane spanning protein	NE
SP5448_RS01185		0.512	0.3353		0.7093	0.1892		0.4233	0.4803		216257	217171	+	WP_010921877.1		M5005_Spy_0217	nanH		N-acetylneuraminate lyase	NE
SP5448_RS01190		-0.1122	0.9178		3.275	0.002103		1.437	0.194		217193	218131	+	WP_010921878.1		M5005_Spy_0218			N-acetylmannosamine kinase	NE
SP5448_RS01195		0.3792	0.7044		-0.5117	0.6063		1.626	0.1207		218242	219072	-	WP_010921879.1		M5005_Spy_0219			transcriptional regulator, RpiR family	NE
SP5448_RS01200		-0.3061	0.7351		-1.747	0.05252		-2.115	0.03015		219357	220148	+	WP_015055911.1		M5005_Spy_0220	tatD		sec-independent protein translocase protein	NE
SP5448_RS01205		-0.2317	0.8023		-1.398	0.1293		-1.487	0.1347		220141	220710	+	WP_002991158.1		M5005_Spy_0221			ribonuclease M5	NE
SP5448_RS01210		0.8871	0.2928		0.3723	0.6591		-0.2294	0.8053		220824	221696	+	WP_002991156.1		M5005_Spy_0222	ksgA		dimethyladenosine transferase	NE
SP5448_RS01215		1.093	0.4078		-0.6423	0.6201		-1.082	0.3855		222120	222992	+	WP_010921881.1		M5005_Spy_0223			GTPase	E
SP5448_RS01220		-0.563	0.6705		-0.6689	0.6064		-0.1972	0.874		223002	223664	+	WP_002992061.1		M5005_Spy_0224	rpe		ribulose-phosphate 3-epimerase	C
SP5448_RS01225		-0.8355	0.2682		-0.7439	0.3256		-0.6474	0.4324		223657	224289	+	WP_010921882.1		M5005_Spy_0225			thiamin pyrophosphokinase	NE
SP5448_RS01230		-0.3939	0.7465		-2.109	0.07981		-0.1567	0.8953		224291	225562	+	WP_010921883.1		M5005_Spy_0226			rmuC family protein	NE
SP5448_RS01235		-0.294	0.7473		1.203	0.1839		1.542	0.1106		225552	226490	+	WP_002986055.1		M5005_Spy_0227	cbf		CMP-binding factor	NE
SP5448_RS01240		-0.9829	0.3093		-1.476	0.1235		-0.951	0.3507		226757	227596	+	WP_002992072.1		M5005_Spy_0228	purR		pur operon repressor	NE
SP5448_RS01245		0.3963	0.655		-1.082	0.2205		-1.071	0.2604		227587	230208	+	WP_010921884.1		M5005_Spy_0229	spyAD		surface adhesin & cell division Protein, SpyAD	NE
SP5448_RS01250		0	1		0	1		0	1		230416	230829	+	WP_002986049.1		M5005_Spy_0230	rpsL		SSU ribosomal protein S12P	E
SP5448_RS01255		0	1		0	1		0	1		230850	231320	+	WP_002992078.1		M5005_Spy_0231	rpsG		SSU ribosomal protein S7P	E
SP5448_RS01260		0	1		0	1		0	1		231687	233765	+	WP_002986045.1		M5005_Spy_0232	fus		protein translation elongation factor G	E
SP5448_RS01265		0	1		0	1		0	1		234113	235123	+	WP_002986042.1		M5005_Spy_0233	plr/gapdh		glyceraldehyde 3-phosphate dehydrogenase	E
SP5448_RS01270		0.7148	0.5337		0.7984	0.491		0	1		235607	236347	-	WP_002986037.1		M5005_Spy_0235			amino acid transport ATP-binding protein	E
SP5448_RS01275		-0.3222	0.7776		0.009067	0.9937		0.4618	0.6738		236340	237908	-	WP_011285384.1		M5005_Spy_0236			ABC transporter amino acid-binding protein/amino acid ABC transporter permease protein	E
SP5448_RS01280		-0.05083	0.9478		-0.03583	0.9633		1.686	0.04644		238106	240004	+	WP_010921886.1		M5005_Spy_0237			hypothetical membrane spanning protein	NE
SP5448_RS01285		0.7459	0.3212		1.635	0.03018		1.512	0.06563		240070	240909	+	WP_002986031.1		M5005_Spy_0238	bacA		putative undecaprenol kinase	NE
SP5448_RS01290		-1.59	0.2091		-2.126	0.08731		-2.312	0.06075		241055	241816	+	WP_002986029.1		M5005_Spy_0239	mecA		negative regulator of genetic competence	NE
SP5448_RS01295		0.07779	0.9503		-0.5791	0.6407		-0.0291	0.9802		241823	242992	+	WP_002991122.1		M5005_Spy_0240	gacO		undecaprenyl-phosphate alpha-N-acetylglucosaminephosphotransferase; Group A Carbohydrate gbcO/tarO homolog	E
SP5448_RS01300		1.017	0.3924		-1.834	0.1203		-2.759	0.02277		243114	243884	+	WP_002986023.1		M5005_Spy_0242			ABC transporter ATP-binding protein	C
SP5448_RS01305		-0.5931	0.6417		0.3507	0.7781		-0.8461	0.494		243979	245241	+	WP_010921887.1		M5005_Spy_0243			ABC transporter-associated protein	C
SP5448_RS01310		-1.389	0.248		-1.229	0.3083		-0.6542	0.5674		245272	246498	+	WP_010921888.1		M5005_Spy_0244	nifS3		cysteine desulfhydrase/selenocysteine lyase	C
SP5448_RS01315		-0.3939	0.7288		-0.08702	0.9396		0.02928	0.9787		246485	246964	+	WP_002986018.1		M5005_Spy_0245	nifU		iscU protein	C
SP5448_RS01320		0	1		0	1		0	1		246957	248375	+	WP_010921889.1		M5005_Spy_0246			ABC transporter-associated protein	C
SP5448_RS01325		0.1739	0.8529		-0.6754	0.4676		2.133	0.03111		248527	249708	-	WP_015055912.1		M5005_Spy_0247			D-alanyl-D-alanine carboxypeptidase	NE
SP5448_RS01330		0.3844	0.6001		1.091	0.1385		-0.2981	0.7108		249876	251108	-	WP_010921890.1		M5005_Spy_0248	dacA2		D-alanyl-D-alanine carboxypeptidase	NE
SP5448_RS01335		0.07937	0.9208		-0.1744	0.8272		1.595	0.0666		251439	253409	+	WP_011285389.1		M5005_Spy_0249	oppA		oligopeptide-binding protein	NE
SP5448_RS01340		0.7855	0.4108		-0.3706	0.6975		0.2212	0.8288		253474	254976	+	WP_010921891.1		M5005_Spy_0250	oppB		oligopeptide transport system permease protein	NE
SP5448_RS01345		0.5713	0.495		0.2068	0.8055		-3.368	0.0006094		254976	255902	+	WP_010921892.1		M5005_Spy_0251	oppC		oligopeptide transport system permease protein	NE
SP5448_RS01350		0.4982	0.6657		-0.1017	0.9287		2.1	0.06738		255911	256981	+	WP_010921893.1		M5005_Spy_0252	oppD		oligopeptide transport ATP-binding protein	NE
SP5448_RS01355		-0.5266	0.6423		-1.634	0.1414		-1.452	0.203		256974	257897	+	WP_002986000.1		M5005_Spy_0253	oppF		oligopeptide transport ATP-binding protein	NE
SP5448_RS01360		-0.3555	0.7872		-0.0201	0.9876		-0.05685	0.9637		258138	258284	-	WP_011184175.1		M5005_Spy_0254			transposase	NC
SP5448_RS01395		0	1		0	1		0	1		264281	264766	+	WP_002988129.1
SP5448_RS01400		-0.5652	0.5627		-0.7328	0.4478		-0.6559	0.5217		264951	265700	+	WP_002988132.1		M5005_Spy_1617			tRNA pseudouridine synthase A	NE
SP5448_RS01405		0.529	0.4511		0.1989	0.7783		-1.445	0.06193		265690	266454	+	WP_002988136.1		M5005_Spy_1616	thiD		phosphomethylpyrimidine kinase/hydroxymethylpyrimidine kinase	NE
SP5448_RS01410		0.2446	0.8301		-0.3835	0.7314		0.7021	0.5394		266444	266914	+	WP_002988139.1		M5005_Spy_1615			hypothetical membrane spanning protein	NE
SP5448_RS01415		0.6378	0.4628		-0.3162	0.7147		2.542	0.006269		266928	267488	+	WP_002995157.1		M5005_Spy_1614			hypothetical protein	NE
SP5448_RS01420		-0.1645	0.8607		1.296	0.1616		-0.3939	0.7001		267553	268398	-	WP_002982833.1		M5005_Spy_1613			mechanosensitive ion channel	NE
SP5448_RS01425		-1.09	0.3764		-2.211	0.068		0.09758	0.9348		268719	270002	+	WP_011054989.1		M5005_Spy_1612	ropA		trigger factor, ppiase	NE
SP5448_RS01430		0.439	0.6541		-0.2321	0.8124		-0.8645	0.4148		270219	270794	+	WP_002988147.1		M5005_Spy_1611	rpoE		DNA-directed RNA polymerase delta chain	NE
SP5448_RS01435		-0.4663	0.5289		0.4061	0.5847		1.156	0.154		271051	272655	+	WP_002988149.1		M5005_Spy_1610	pyrG		CTP synthase	NE
SP5448_RS01440		0.564	0.5866		0.6019	0.5552		5.019	2.595e-06		272823	273749	+	WP_010922651.1		M5005_Spy_1608			alpha/beta hydrolase	NE
SP5448_RS01450		0.3088	0.7851		0	1		0	1		274095	274976	+	WP_002982850.1		M5005_Spy_1607	fba		fructose-bisphosphate aldolase	E
SP5448_RS01455		-0.1496	0.8849		0.2747	0.7886		-1.586	0.1454		275358	275546	+	WP_002982870.1		M5005_Spy_1606	rpmB		LSU ribosomal protein L28P	NE
SP5448_RS01460		0	1		0	1		0	1		275724	276857	+	WP_000564846.1		M5005_Spy_1605			transposase	NE
SP5448_RS01465											276862	276999	+	WP_011285709.1
SP5448_RS01470		-1.103	0.395		-2.759	0.03048		0.7311	0.5503		277024	277389	+	WP_002982874.1		M5005_Spy_1603	asp		putative alkaline-shock protein	NE
SP5448_RS01475		-0.4688	0.6805		-0.2905	0.8008		0.144	0.8954		277389	279053	+	WP_002992286.1		M5005_Spy_1602			predicted kinase related to hydroxyacetone kinase	E
SP5448_RS01480		0.8536	0.2082		0.7186	0.2933		-0.542	0.4708		279290	280180	+	WP_010922650.1		M5005_Spy_1601			membrane protease protein family	NE
SP5448_RS01485		0.5309	0.5134		0.5716	0.4816		1.472	0.09628		280410	281264	+	WP_010922649.1		M5005_Spy_1600	lppC		acid phosphatase	NE
SP5448_RS01490		-0.1121	0.9269		-0.2519	0.8366		0.7799	0.5011		281457	282653	+	WP_002982888.1		M5005_Spy_1599	pgk		phosphoglycerate kinase	E
SP5448_RS01495		0.5859	0.5553		-0.1942	0.8448		-2.201	0.04784		282916	283467	+	WP_002982891.1		M5005_Spy_1598			hypothetical protein	NE
SP5448_RS01500		-0.7349	0.5786		-1.661	0.2011		-1.521	0.2204		283534	283905	+	WP_002982895.1		M5005_Spy_1597			transcriptional regulator, MerR family	NE
SP5448_RS01505		-1.161	0.2982		-2.023	0.06617		-0.3225	0.7748		283943	285289	+	WP_009880482.1		M5005_Spy_1596	glnA		glutamine synthetase	NE
SP5448_RS01510		0	1		0	1		0.6935	0.5253		285516	287198	-	WP_002982901.1		M5005_Spy_1595			Zn-dependent hydrolase	E
SP5448_RS01515		0	1		0	1		0	1		287200	287430	-	WP_002982907.1		M5005_Spy_1594			putative transcriptional regulator	E
SP5448_RS01520		0	1		0	1		1.435	0.1896		287715	288413	+	WP_011285708.1		M5005_Spy_1593			glycoprotease protein family	C
SP5448_RS01525		-0.2985	0.7784		-0.4455	0.6722		-1.48	0.1944		288415	288840	+	WP_010922647.1		M5005_Spy_1592			ribosomal-protein-alanine acetyltransferase	NE
SP5448_RS01530		-0.1405	0.9142		-1.394	0.2764		-1.608	0.197		288830	289858	+	WP_002988178.1		M5005_Spy_1591			O-sialoglycoprotein endopeptidase	E
SP5448_RS01535		0.1199	0.9113		-0.5599	0.5967		0.1559	0.8873		290029	290298	-	WP_002982921.1		M5005_Spy_1590	rpsN2		SSU ribosomal protein S14P	NE
SP5448_RS01540		-0.04564	0.9616		1.166	0.2136		-1.151	0.2486		290534	291277	-	WP_010922646.1		M5005_Spy_1589	crgR		transcriptional regulator, Cathelicidin resistance	NE
SP5448_RS01545		-0.4587	0.6897		-0.7002	0.5369		-1.949	0.09751		291517	292296	+	WP_001182060.1		M5005_Spy_1587	udp		uridine phosphorylase	NE
SP5448_RS01550		0.7737	0.4709		0.1819	0.8637		0.2381	0.8288		292317	293519	+	WP_002992274.1		M5005_Spy_1586	nupC		nucleoside permease	NE
SP5448_RS01555		-0.08123	0.9293		-0.5743	0.5306		-2.717	0.01064		293549	294220	+	WP_009880896.1		M5005_Spy_1585	deoC		deoxyribose-phosphate aldolase	NE
SP5448_RS01560		0.6523	0.537		-1.217	0.2461		-0.4618	0.6728		294315	295484	-	WP_009880895.1		M5005_Spy_1584			NAD(FAD)-utilizing dehydrogenases	NE
SP5448_RS01565		-0.7413	0.5747		-1.559	0.2292		-1.558	0.2109		295690	296220	+	WP_002988196.1		M5005_Spy_1583			hypothetical cytosolic protein	NE
SP5448_RS01570		-0.9197	0.2797		-1.389	0.1014		-1.117	0.2208		296269	296856	+	WP_047343323.1		M5005_Spy_1582	dnaQ		DNA polymerase III, epsilon chain	NE
SP5448_RS01575		-0.5295	0.5258		-0.8317	0.3178		-2.422	0.006979		297005	297742	+	WP_010922644.1		M5005_Spy_1581			transcriptional regulator, MerR family	NE
SP5448_RS01580		-0.5241	0.6625		-0.4844	0.6815		-2.094	0.08462		297799	298098	-	WP_010922643.1		M5005_Spy_1580			hypothetical cytosolic protein	NE
SP5448_RS01585		0.1308	0.8903		-0.336	0.7234		-1.726	0.1076		298291	298665	-	WP_002992262.1		M5005_Spy_1579			transcriptional regulator	NE
SP5448_RS01590		-0.1584	0.9047		-1.224	0.3459		-1.237	0.32		298835	299056	+	WP_002988211.1		M5005_Spy_1578			transcriptional regulator, Cro/CI family	NE
SP5448_RS01595		-0.245	0.7714		-1.099	0.1918		1.108	0.2258		299136	301418	-	WP_011285704.1		M5005_Spy_1577	pepXP		Xaa-Pro dipeptidyl-peptidase	NE
SP5448_RS01600		0.6185	0.4944		-0.2728	0.7632		1.833	0.06189		301440	302099	-	WP_014635687.1		M5005_Spy_1576	srv		transcription regulator, crp family	NE
SP5448_RS01605		0.5811	0.5243		0.9289	0.306		-0.3945	0.6876		302265	303461	+	WP_011285703.1		M5005_Spy_1575	norA		quinolone resistance protein	NE
SP5448_RS01610		-0.591	0.618		-2.53	0.03322		1.963	0.08955		303963	304811	+	WP_002983047.1		M5005_Spy_1573	glpF.2		aquaporin	C
SP5448_RS01615		0.4109	0.6534		-0.1425	0.8753		-3.12	0.001358		305147	306043	-	WP_002983050.1		M5005_Spy_1572			hypothetical membrane spanning protein	NE
SP5448_RS01620		-0.4681	0.678		-2.642	0.01973		-3.01	0.01134		306341	307093	+	WP_002983053.1		M5005_Spy_1571			c3-degrading proteinase	NE
SP5448_RS01625		0.2379	0.7719		-0.5301	0.5217		-0.3666	0.6967		307090	308028	+	WP_015446298.1		M5005_Spy_1570			penicillin-binding protein	NE
SP5448_RS01630		-1.048	0.3352		-0.6572	0.5382		-0.08011	0.9423		308206	310533	-	WP_002988233.1		M5005_Spy_1569	pfl		formate acetyltransferase	NE
SP5448_RS01635		-0.3497	0.7004		-0.3681	0.6832		0.383	0.6909		310742	311836	+	WP_011285702.1		M5005_Spy_1568	dinP		DNA polymerase IV	NE
SP5448_RS01640		-0.08803	0.9404		-0.9439	0.4168		-1.317	0.2683		311929	312411	-	WP_002983066.1		M5005_Spy_1567			hypothetical protein	NE
SP5448_RS01645		1.224	0.2293		0.7916	0.4297		2.515	0.0169		312502	314943	-	WP_047343324.1		M5005_Spy_1566	recD		exodeoxyribonuclease V alpha chain	NE
SP5448_RS01650		0.2118	0.8726		3.111	0.0162		-0.351	0.7784		315001	315594	-	WP_002983074.1		M5005_Spy_1565	spi		signal peptidase I	E
SP5448_RS01655		-0.5466	0.6324		-0.4687	0.6848		-0.2624	0.8112		315605	316507	-	WP_010922635.1		M5005_Spy_1564			ribonuclease HIII	C
SP5448_RS01660		-1.823	0.1418		-2.12	0.08177		-1.761	0.1487		316664	316972	+	WP_002993251.1		M5005_Spy_1563			hypothetical cytosolic protein	NE
SP5448_RS01665		-0.3733	0.777		-1.027	0.428		-1.063	0.3885		316975	317520	+	WP_011285701.1		M5005_Spy_1562			colicin V production protein	NE
SP5448_RS01670		0.03234	0.9679		-0.4723	0.5578		-0.5113	0.5626		317669	320008	+	WP_010922633.1		M5005_Spy_1561	mutS2		DNA mismatch repair protein	NE
SP5448_RS01675		0.5085	0.6015		-0.6281	0.5173		0.4218	0.6834		320012	320512	+	WP_015055998.1		M5005_Spy_1560			phosphatidylglycerophosphatase B	NE
SP5448_RS01680		-0.1587	0.8887		-0.004321	0.997		0.6582	0.5468		320593	320907	+	WP_001162959.1		M5005_Spy_1559	trx		thioredoxin	NE
SP5448_RS01685		0.815	0.454		0.3903	0.7152		1.297	0.2418		320959	321546	-	WP_010922631.1		M5005_Spy_1558			transcriptional regulator	NE
SP5448_RS01690		0.5321	0.3719		0.5095	0.3986		0.8158	0.2235		321622	322746	-	WP_010922630.1		M5005_Spy_1557	mutY		A/G-specific adenine DNA glycosylase	NE
SP5448_RS01695		0.4076	0.7171		1.637	0.1366		1.56	0.1684		322944	323237	+	WP_002983113.1		M5005_Spy_1556			hypothetical protein	NE
SP5448_RS01700		0	1		0	1		0	1		323410	323700	+	WP_002983117.1		M5005_Spy_1555	rpsF		SSU ribosomal protein S6P	NC
SP5448_RS01705		0.3868	0.7516		-0.0925	0.9396		-0.1797	0.8762		323722	324213	+	WP_002983122.1		M5005_Spy_1554	ssb3		phage single-strand DNA binding protein	NC
SP5448_RS01710		0	1		0	1		1.096	0.3157		324378	324617	+	WP_002983142.1		M5005_Spy_1553	rpsR		SSU ribosomal protein S18P	NC
SP5448_RS01715		0.361	0.7001		-0.5894	0.5263		3.75	0.0001577		324750	325406	-	WP_010922629.1		M5005_Spy_1552			hypothetical membrane spanning protein	NE
SP5448_RS01720		-0.3356	0.7706		0.06647	0.9544		-0.2117	0.8477		325539	326483	-	WP_002983147.1		M5005_Spy_1551	corA		magnesium and cobalt transport protein	E
SP5448_RS01725		0.1439	0.8655		0.1563	0.8536		-0.2477	0.7866		326686	329514	+	WP_015055996.1		M5005_Spy_1550	uvrA		excinuclease ABC subunit A	NE
SP5448_RS01730		0.1567	0.8371		0.3858	0.6136		0.2414	0.7753		329629	330702	+	WP_010922627.1		M5005_Spy_1549			Xaa-Pro dipeptidase	NE
SP5448_RS01735		0.1153	0.9207		1.048	0.357		-1.728	0.1489		330737	331198	+	WP_002988493.1		M5005_Spy_1548	comEB		comE operon protein 2	NE
SP5448_RS01740		-0.8585	0.456		-0.8434	0.468		-0.7091	0.5203		331294	331851	+	WP_002988496.1		M5005_Spy_1547	efp		protein translation elongation factor P	NE
SP5448_RS01745		0	1		0	1		0.8334	0.4453		331897	332286	+	WP_002983163.1		M5005_Spy_1546			general stress protein, Gls24 family	NC
SP5448_RS01750		0.2322	0.8375		0	1		0	1		332279	332731	+	WP_011285698.1		M5005_Spy_1545	nusB		N utilization substance protein B	C
SP5448_RS01755		0.4189	0.6616		0.068	0.943		-1.15	0.2634		332872	333837	-	WP_002988504.1		M5005_Spy_1544	scrR		sucrose operon repressor	NE
SP5448_RS01760		-0.4	0.589		0.7933	0.2858		0.8079	0.3185		333842	335281	-	WP_010922625.1		M5005_Spy_1543	scrB		sucrose-6-phosphate hydrolase	NE
SP5448_RS01765		0.2543	0.7834		-0.1868	0.8385		1.989	0.04178		335523	337406	+	WP_011285697.1		M5005_Spy_1542	scrA		PTS system, Sucrose-specific IIABC component	NE
SP5448_RS01770		0.6299	0.3744		0.5386	0.4504		0.8841	0.2589		337637	340624	+	WP_011285695.1		M5005_Spy_1540	endoS		endo-beta-N-acetylglucosaminidase; N-glycan syst Pneumo	NE
SP5448_RS01775		0.01793	0.9817		-1.75	0.02912		-1.208	0.1952		340888	341772	+	WP_010922622.1		M5005_Spy_1539	scrK		fructokinase	NE
SP5448_RS01780		-0.6854	0.6045		-0.9732	0.4537		-1.156	0.3519		341867	342820	+	WP_002983189.1		M5005_Spy_1538	pmi		mannose-6-phosphate isomerase	NE
SP5448_RS01785		0	1		0	1		0	1		342982	343686	+	WP_011285693.1		M5005_Spy_0187			transposase	NE
SP5448_RS01790		0	1		0	1		0	1		343589	344104	+	WP_011285692.1		M5005_Spy_0298			transposase	NE
SP5448_RS01795											344109	344192	+	WP_003051036.1
SP5448_RS01800		-0.4641	0.6846		0.08821	0.9392		-0.07199	0.9477		344270	346789	+	WP_002988523.1		M5005_Spy_1534	secA		protein translocase subunit	E
SP5448_RS01805		0	1		0	1		1.291	0.2374		346905	347261	+	WP_010922620.1		M5005_Spy_1533	alr		holo-[acyl-carrier protein] synthase	NC
SP5448_RS01810		0	1		0	1		1.433	0.1902		347258	348358	+	WP_010922619.1		M5005_Spy_1532	acpS		alanine racemase	NC
SP5448_RS01815		0.06422	0.9286		-0.927	0.1986		-1.341	0.09132		348445	349956	+	WP_010922618.1		M5005_Spy_1531	isp2		immunogenic secreted protein	NE
SP5448_RS01820		0.3846	0.6204		1.966	0.01149		-0.399	0.6368		350445	354272	+	WP_010922617.1		M5005_Spy_1530	shr		iron compound ABC transporter, substrate-binding protein	NE
SP5448_RS01825		0.4465	0.5868		-0.114	0.8895		1.088	0.2198		354469	355344	+	WP_010922616.1		M5005_Spy_1529	shp		iron compound ABC transporter, permease protein	NE
SP5448_RS01830		-0.3229	0.7892		0.443	0.7084		-0.0508	0.966		355328	356212	+	WP_010922615.1		M5005_Spy_1528	siaA		iron compound ABC transporter, ATP-binding protein	NE
SP5448_RS01835		1.152	0.2299		1.155	0.2235		-0.07215	0.9429		356214	357236	+	WP_002995381.1		M5005_Spy_1527	siaB		ABC transporter, ATP-binding protein, putative	NE
SP5448_RS01840		0.35	0.736		-0.6283	0.5384		0.9394	0.3795		357233	358069	+	WP_010922614.1		M5005_Spy_1526	siaC		ABC transporter, ATP-binding protein, putative	NE
SP5448_RS01845		0.4565	0.6267		0.3283	0.724		0.7046	0.476		358066	359829	+	WP_011018172.1		M5005_Spy_1525	siaD		conserved hypothetical protein	NE
SP5448_RS01850		0.1426	0.8982		-0.6655	0.5432		1.793	0.1112		359822	361492	+	WP_010922612.1		M5005_Spy_1524	siaE		conserved hypothetical protein	NE
SP5448_RS01855		-0.05005	0.9502		-0.1136	0.8874		-0.5387	0.5364		361489	362082	+	WP_010922611.1		M5005_Spy_1523	siaF		ABC transporter, ATP-binding protein	NE
SP5448_RS01860		-0.3329	0.7168		-0.1703	0.8516		-0.1308	0.8933		362079	362759	+	WP_010922610.1		M5005_Spy_1522	siaG		cobalt transport protein cbiQ	NE
SP5448_RS01865		-0.2454	0.7538		-0.1188	0.8795		-0.2632	0.7568		362696	364150	+	WP_011285690.1		M5005_Spy_1521	siaH		cobalt transport ATP-binding protein cbiO	NE
SP5448_RS01870		-1.08	0.2467		-1.324	0.1529		-3.104	0.002231		364525	366540	+	WP_010922609.1		M5005_Spy_1519	recG		ATP-dependent DNA helicase	NE
SP5448_RS01875		-0.4302	0.6109		-0.5185	0.5384		0.1744	0.8476		366833	367735	+	WP_011285688.1		M5005_Spy_1518			transporter	NE
SP5448_RS01880		0.2612	0.8143		0.6842	0.5297		-0.09384	0.9335		367748	368452	+	WP_002988556.1		M5005_Spy_1517			lantibiotic transport permease protein	NE
SP5448_RS01885		0.458	0.5914		-0.4208	0.6206		0.555	0.5439		368801	369766	-	WP_011285687.1		M5005_Spy_1516	asnB		L-asparaginase	NE
SP5448_RS01890		0.344	0.7303		1.508	0.1258		1.172	0.2602		369838	371226	+	WP_010922607.1		M5005_Spy_1515			hydrolase, HAD superfamily	NE
SP5448_RS01895		0.3794	0.7567		-1.558	0.1976		3.544	0.002815		371349	371801	-	WP_015055992.1		M5005_Spy_1514			universal stress protein family	NE
SP5448_RS01900		0.4071	0.5226		0.199	0.7571		0.119	0.8666		372032	373246	+	WP_010922605.1		M5005_Spy_1513			aspartate aminotransferase	NE
SP5448_RS01905		0.2528	0.8246		-0.003769	0.9974		0.6061	0.58		373464	374246	+	WP_002983278.1		M5005_Spy_1512	codY		transcription pleiotropic repressor	C
SP5448_RS01910		0.04983	0.9615		-0.5583	0.5831		2.029	0.05691		374393	374947	+	WP_010922604.1		M5005_Spy_1511			pyrazinamidase/nicotinamidase	NE
SP5448_RS01915		0.4859	0.7034		0.07404	0.9528		0.7607	0.5356		375462	375710	+	WP_027968785.1		M5005_Spy_1509			pyruvate, phosphate dikinase	NE
SP5448_RS01920		0	1		0	1		0	1		375942	376244	+	WP_002988561.1		M5005_Spy_1508	gatC		glutamyl-tRNA(Gln) amidotransferase subunit C	E
SP5448_RS01925		0	1		0	1		1.085	0.3202		376244	377710	+	WP_011285681.1		M5005_Spy_1507	gatA		aspartyl/glutamyl-tRNA(Asn/Gln) amidotransferase a	E
SP5448_RS01930		0	1		0	1		0	1		377710	379149	+	WP_010922602.1		M5005_Spy_1506	gatB		aspartyl/glutamyl-tRNA(Asn/Gln) amidotransferase b	E
SP5448_RS01935		0.3161	0.7022		0.01398	0.9865		0.07738	0.9329		379146	379361	+	WP_002991523.1		M5005_Spy_1505			hypothetical protein	NE
SP5448_RS01940		0.6727	0.5398		-0.489	0.6528		-1.169	0.3024		379580	379819	+	WP_002988565.1		M5005_Spy_1504			hypothetical membrane spanning protein	NE
SP5448_RS01945		0.653	0.4812		0.1785	0.8465		0.5235	0.5981		380210	380917	+	WP_002995490.1		M5005_Spy_1503			phosphoglycerate mutase	NE
SP5448_RS01950		1.547	0.1065		2.038	0.0316		0.5269	0.6006		380907	381650	+	WP_010922601.1		M5005_Spy_1502			D-alanyl-D-alanine carboxypeptidase	NE
SP5448_RS01955		1.355	0.1739		-0.1842	0.8533		-2.846	0.01161		381647	382216	+	WP_010922600.1		M5005_Spy_1501			N-acetylmuramoyl-L-alanine amidase	NE
SP5448_RS01960		-0.6721	0.5577		-0.212	0.8549		-0.3052	0.7816		382351	383385	+	WP_002988568.1		M5005_Spy_1500	hrcA		heat-inducible transcription repressor	C
SP5448_RS01965		-0.6455	0.3857		-0.6607	0.3742		-0.9043	0.2702		383388	383960	+	WP_002983313.1		M5005_Spy_1499	grpE		hypothetical protein	E
SP5448_RS01970		-1.029	0.4102		0.7433	0.5418		1.863	0.1216		384141	385967	+	WP_010922599.1		M5005_Spy_1498	dnaK		chaperone protein	E
SP5448_RS01975		0.1937	0.883		-0.305	0.8138		-0.2549	0.836		386248	387384	+	WP_002993772.1		M5005_Spy_1497	dnaJ		chaperone protein	E
SP5448_RS01980		-0.389	0.7435		-0.4046	0.7347		0.5925	0.6015		387604	388395	+	WP_010922598.1		M5005_Spy_1496	phaB		enoyl-CoA hydratase	E
SP5448_RS01985		0	1		0	1		0	1		388472	388906	+	WP_002993768.1		M5005_Spy_1495	fabT		transcriptional regulator,MarR family; FabT	NC
SP5448_RS01990		-0.6284	0.5855		-0.6292	0.5884		-0.02284	0.9835		388907	389881	+	WP_010922596.1		M5005_Spy_1494	fabH		3-oxoacyl-[acyl-carrier-protein] synthase III	E
SP5448_RS01995		0	1		0	1		0	1		389942	390166	+	WP_002983328.1		M5005_Spy_1493	acpP		acyl carrier protein	E
SP5448_RS02000		0.2311	0.8384		0.403	0.7249		0	1		390368	391339	+	WP_002983333.1		M5005_Spy_1492	fabK		enoyl-[acyl-carrier protein] reductase (NADH)	C
SP5448_RS02005		-0.1498	0.8949		0.3449	0.7638		0.2829	0.7957		391364	392302	+	WP_010922595.1		M5005_Spy_1491	fabD		malonyl-CoA-[acyl-carrier-protein] transacylase	E
SP5448_RS02010		0	1		0	1		0	1		392292	393026	+	WP_011018156.1		M5005_Spy_1490			3-oxoacyl-[acyl-carrier protein] reductase	E
SP5448_RS02015		0	1		0	1		0	1		393041	394273	+	WP_010922593.1		M5005_Spy_1489	fabF		3-oxoacyl-[acyl-carrier-protein] synthase	E
SP5448_RS02020		0	1		0	1		0	1		394275	394775	+	WP_002988620.1		M5005_Spy_1488	accB		biotin carboxyl carrier protein of acetyl-CoA	E
SP5448_RS02025		0.3088	0.7851		0	1		0	1		394772	395194	+	WP_002983343.1		M5005_Spy_1487	fabZ		(3R)-hydroxymyristoyl-[ACP] dehydratase	C
SP5448_RS02030		-0.01991	0.986		0.4815	0.6758		0.295	0.7874		395226	396590	+	WP_010922591.1		M5005_Spy_1486	accC		biotin carboxylase	E
SP5448_RS02035		0.2165	0.8488		0.4394	0.7021		1.102	0.3133		396599	397465	+	WP_010922590.1		M5005_Spy_1485	accA		acetyl-coenzyme A carboxylase carboxyl transferase b	E
SP5448_RS02040		0	1		0	1		1.096	0.3157		397462	398232	+	WP_010922589.1		M5005_Spy_1484	accD		acetyl-coenzyme A carboxylase carboxyl transferase a	E
SP5448_RS02045		0.6137	0.5936		0.9538	0.4116		0	1		398454	399731	-	WP_002983351.1		M5005_Spy_1483	serS		seryl-tRNA synthetase	E
SP5448_RS02050		0.3078	0.6451		0.1698	0.8011		-0.02015	0.9783		400123	400482	-	WP_002988634.1		M5005_Spy_1482	manO		hypothetical cytosolic protein	NE
SP5448_RS02055		0.4134	0.6949		-0.1344	0.8978		-1.41	0.2077		400596	401507	-	WP_010922588.1		M5005_Spy_1481	manN		PTS system, Mannose-specific IID; Primary Glucose PTS	NE
SP5448_RS02060		1.4	0.1776		-0.1416	0.8912		0.04241	0.9691		401524	402333	-	WP_002983360.1		M5005_Spy_1480	manM		PTS system, Mannose-specific IIC; Primary Glucose PTS	NE
SP5448_RS02065		-0.104	0.8822		-0.1156	0.8701		0.5131	0.5069		402422	403414	-	WP_002983363.1		M5005_Spy_1479	manL		PTS system, Mannose-specific IIAB; Primary Glucose PTS	NE
SP5448_RS02070		0.1009	0.9158		-0.2791	0.7679		1.827	0.0693		403766	404578	-	WP_010922586.1		M5005_Spy_1478			hydrolase, HAD superfamily	NE
SP5448_RS02075		-0.1083	0.9136		0.4044	0.6814		1.274	0.2201		404842	406302	+	WP_011285677.1		M5005_Spy_1477			guanine-hypoxanthine permease	NE
SP5448_RS02080		0	1		0	1		0	1		406456	406917	+	WP_009880751.1		M5005_Spy_1476			ATP/GTP hydrolase	NC
SP5448_RS02085		0.4154	0.5521		0.5911	0.4007		0.5683	0.4602		406892	407416	+	WP_009880752.1		M5005_Spy_1475			acetyltransferase	NE
SP5448_RS02090		-0.02857	0.9787		-3.161	0.002687		-1.079	0.3245		407425	408699	+	WP_010922584.1		M5005_Spy_1474	lytR/cpsA		transcriptional regulator, LytR family	NE
SP5448_RS02095		0.2411	0.7917		0.5145	0.5699		0.1154	0.905		408810	409166	-	WP_002988657.1		M5005_Spy_1473			hypothetical protein	NE
SP5448_RS02100		-0.7241	0.4786		-1.597	0.1167		0.6013	0.5733		409163	409582	-	WP_002983376.1		M5005_Spy_1472	hit		bis(5'-nucleosyl)-tetraphosphatase (asymmetrical)	NE
SP5448_RS02105		0.3726	0.6767		-1.919	0.03067		-3.455	0.0002788		409654	410379	+	WP_002983379.1		M5005_Spy_1471	pptA		Peptide Phermone Transporter A; ABC SHP-Rgg2/3-QS	NE
SP5448_RS02110		-0.007703	0.9929		-2.035	0.01867		-2.474	0.00779		410382	411416	+	WP_010922583.1		M5005_Spy_1470	pptB		Peptide Phermone Transporter B; ABC SHP-Rgg2/3-QS	NE
SP5448_RS02115		0	1		0	1		0	1		411480	412271	+	WP_002983385.1		M5005_Spy_1469			phosphotransferase enzyme family	E
SP5448_RS02120		-0.2061	0.8497		-1.274	0.2389		-0.996	0.3812		412271	412906	+	WP_002983387.1		M5005_Spy_1468			tRNA (m(7)G46) methyltransferase	NE
SP5448_RS02130		0.1645	0.8628		0.5509	0.5595		-0.9793	0.3344		413104	414183	-	WP_002988667.1		M5005_Spy_1467	int.3		phi5005.3 integrase	NE
SP5448_RS02135		0.4869	0.5044		0.569	0.4379		1.931	0.01737		414300	414851	-	WP_002988670.1		M5005_Spy_1466			phage protein	NE
SP5448_RS02140		0.3949	0.6594		-0.6567	0.4627		-0.5819	0.5491		414862	415245	-	WP_002988673.1		M5005_Spy_1465			phage protein	NE
SP5448_RS02145		0.2717	0.8118		1.124	0.3305		0	1		415259	415660	-	WP_011285676.1		M5005_Spy_1464			phage transcriptional regulator, Cro/CI family	E
SP5448_RS02150		0.3066	0.7744		-0.5799	0.5867		-2.014	0.08427		416071	416484	-	WP_002988681.1		M5005_Spy_1462			phage protein	NE
SP5448_RS02155		-0.4898	0.7099		-1.547	0.2322		-1.362	0.2685		416532	416747	+	WP_002988684.1		M5005_Spy_1461			phage protein	NE
SP5448_RS02160		0	1		0	1		0	1		416809	417084	+	WP_002988687.1		M5005_Spy_1460			phage protein	NC
SP5448_RS02165		-0.8365	0.4688		-0.8154	0.4839		-0.4997	0.6512		417244	417447	+	WP_002988697.1		M5005_Spy_1458			phage protein	NC
SP5448_RS02170		-0.08701	0.9448		-0.3125	0.8		-0.1163	0.9246		417444	417830	+	WP_002988700.1		M5005_Spy_1457			phage protein	NE
SP5448_RS02175		-0.1135	0.9215		0.04844	0.9668		-0.1894	0.8635		417976	418179	+	WP_002988705.1		M5005_Spy_1455			phage protein	NC
SP5448_RS02180		-0.07208	0.9499		-0.007241	0.995		-0.05103	0.963		418267	418566	+	WP_002988708.1		M5005_Spy_1454			phage protein	NE
SP5448_RS02185		-0.5538	0.5756		0.8839	0.3654		-0.1393	0.8932		418566	419720	+	WP_002988711.1		M5005_Spy_1453			phage protein	NE
SP5448_RS02190		-0.4036	0.6962		-1.599	0.121		-2.406	0.03051		419724	420122	+	WP_002988715.1		M5005_Spy_1452			phage protein	NE
SP5448_RS02195		-0.8807	0.4299		-0.5489	0.6178		-1.097	0.3445		420133	420690	+	WP_002988718.1		M5005_Spy_1451			phage protein	NE
SP5448_RS02200		-0.5731	0.608		-1.488	0.1781		1.161	0.302		420733	422655	+	WP_002988723.1		M5005_Spy_1450			phage-encoded DNA polymerase	NE
SP5448_RS02205		-0.3717	0.6291		0.08452	0.9129		0.5123	0.5512		422660	425044	+	WP_011285674.1		M5005_Spy_1449			DNA primase	NE
SP5448_RS02210		-0.429	0.7458		-1.67	0.1986		-1.134	0.3615		425431	425706	+	WP_002988730.1		M5005_Spy_1448			hypothetical protein	NE
SP5448_RS02215		0.02226	0.9739		0.5384	0.4321		0.5426	0.4707		425703	427025	+	WP_002988733.1		M5005_Spy_1447			phage-related DNA helicase	NE
SP5448_RS02220		0.2365	0.8134		1.424	0.1494		-1.651	0.1375		427190	427456	+	WP_002988738.1		M5005_Spy_1445			phage protein	NE
SP5448_RS02225		0.4864	0.4961		0.4219	0.5572		-0.4217	0.5916		427465	428316	+	WP_002988740.1		M5005_Spy_1444			adenine-specific methyltransferase	NE
SP5448_RS02230		-1.056	0.3989		-1.21	0.324		0.9558	0.4281		428306	428497	+	WP_002988743.1		M5005_Spy_1443			phage protein	NE
SP5448_RS02235		0.8459	0.3479		-0.2618	0.7707		0.5039	0.6033		428494	428910	+	WP_002988747.1		M5005_Spy_1442			phage transcriptional activator	NE
SP5448_RS02240		1.024	0.2548		0.5911	0.5117		-1.148	0.257		429000	429452	+	WP_011106637.1		M5005_Spy_1441			phage terminase small subunit	NE
SP5448_RS02245		0.03876	0.9599		-0.3743	0.6284		-0.1419	0.8682		429442	430719	+	WP_002988754.1		M5005_Spy_1440			terminase large subunit	NE
SP5448_RS02250		0.06707	0.9234		-0.2258	0.7482		-0.5982	0.4507		430735	432267	+	WP_002988758.1		M5005_Spy_1439			portal protein	NE
SP5448_RS02255		0.5448	0.4732		0.3885	0.6108		2.593	0.002269		432227	433672	+	WP_015446273.1		M5005_Spy_1438			phage protein	NE
SP5448_RS02260		-0.8676	0.4153		0.8513	0.4151		-1.005	0.3602		433703	433891	+	WP_002983423.1		M5005_Spy_1437			hypothetical protein	NE
SP5448_RS02265		-0.5436	0.4441		0.3474	0.6268		-0.4668	0.5501		433894	434160	+	WP_002988765.1		M5005_Spy_1436			phage protein	NE
SP5448_RS02270		-0.981	0.3978		1.165	0.3052		0.5579	0.6305		434316	434885	+	WP_002988768.1		M5005_Spy_1435			phage scaffold protein	NE
SP5448_RS02275		-0.6367	0.5096		0.4157	0.6631		1.114	0.2707		434898	435785	+	WP_002988771.1		M5005_Spy_1434			phage protein	NE
SP5448_RS02280		-0.3726	0.7684		-1.659	0.1826		-0.2828	0.8173		435797	436153	+	WP_002988776.1		M5005_Spy_1433			phage protein	NE
SP5448_RS02285		-0.653	0.5713		-0.2277	0.841		-2.251	0.0595		436164	436442	+	WP_000639437.1		M5005_Spy_1432			phage protein	NE
SP5448_RS02290		-0.8743	0.3798		-0.5748	0.5612		-1.739	0.1156		436439	436783	+	WP_002988781.1		M5005_Spy_1431			phage protein	NE
SP5448_RS02295		0.8875	0.4413		0.1885	0.8685		-1.855	0.1216		436787	437146	+	WP_002988782.1		M5005_Spy_1430			phage protein	NE
SP5448_RS02300		0.151	0.9008		-0.3837	0.7463		3.305	0.005279		437158	437757	+	WP_002988784.1		M5005_Spy_1429			phage protein	NE
SP5448_RS02305		-0.7574	0.5651		0.5446	0.672		-0.9201	0.4608		437811	438266	+	WP_002983443.1		M5005_Spy_1428			phage protein	NE
SP5448_RS02310		-0.5498	0.6215		-0.4013	0.7127		0.7555	0.5017		438341	438574	+	WP_002983445.1		M5005_Spy_1427			phage protein	NE
SP5448_RS02315		0.2237	0.814		1.28	0.1738		1.482	0.1379		438589	442971	+	WP_002988786.1		M5005_Spy_1426			phage protein	NE
SP5448_RS02320		-0.0856	0.914		0.2268	0.7748		1.911	0.0263		442983	443825	+	WP_002988788.1		M5005_Spy_1425			phage protein	NE
SP5448_RS02325		-0.1924	0.7707		-0.9942	0.1365		-0.3261	0.6705		443835	445817	+	WP_002988790.1		M5005_Spy_1424			phage endopeptidase	NE
SP5448_RS02330		-0.5091	0.4691		-2.189	0.002009		-4.404	1.438e-08		445814	446869	+	WP_002988439.1		M5005_Spy_1423			hyaluronoglucosaminidase	NE
SP5448_RS02335		0.02565	0.9737		-0.1833	0.8142		2.333	0.006864		446869	447504	+	WP_002988442.1		M5005_Spy_1422			phage protein	NE
SP5448_RS02340		-0.4012	0.6231		-0.8339	0.3067		0.2045	0.8172		447515	449422	+	WP_002988792.1		M5005_Spy_1421			phage infection protein	NE
SP5448_RS02345		0.3713	0.714		1.768	0.07642		1.302	0.2146		449595	450215	+	WP_002988797.1		M5005_Spy_1419			phage protein	NE
SP5448_RS02350		-0.06272	0.9545		0.003435	0.9975		1.992	0.07431		450226	450525	+	WP_002988799.1		M5005_Spy_1418			phage protein	NE
SP5448_RS02355		0.5935	0.6537		1.093	0.3999		0.1867	0.8806		450522	450707	+	WP_002988802.1		M5005_Spy_1417			phage protein	NE
SP5448_RS02365		0.1218	0.8094		0.5223	0.3097		0.3969	0.4884		450818	452014	+	WP_002988807.1		M5005_Spy_1416			phage-associated cell wall hydrolase	NE
SP5448_RS02370		0.5942	0.4257		0.6062	0.4181		1.281	0.1165		452130	453302	-	WP_002988811.1		M5005_Spy_1415	sdaD2		phage-encoded streptodornase	NE
SP5448_RS02375		-0.3945	0.7293		-0.0747	0.947		-0.8143	0.4888		453541	453720	+	WP_002988813.1		M5005_Spy_1414			phage protein	NC
SP5448_RS02380		0.5531	0.6292		-0.1083	0.9239		-0.8809	0.4594		454007	454501	+	WP_042361561.1		M5005_Spy_1413			hypothetical cytosolic protein	NE
SP5448_RS02385		-0.1542	0.8918		0.148	0.8973		0.4742	0.6643		454676	455833	+	WP_002988817.1		M5005_Spy_1412	nusA		N utilization substance protein A	E
SP5448_RS02390		0	1		0	1		0	1		455849	456145	+	WP_002983486.1		M5005_Spy_1411			hypothetical cytosolic protein	C
SP5448_RS02395		0.6948	0.5994		0.06883	0.9577		1.599	0.1983		456138	456440	+	WP_002983488.1		M5005_Spy_1410			LSU ribosomal protein L7AE	C
SP5448_RS02400		0.8969	0.4475		-0.4128	0.7255		3.162	0.00638		456460	459321	+	WP_002983491.1		M5005_Spy_1409	infB		bacterial protein translation initiation factor 2	E
SP5448_RS02405		-0.1011	0.93		-0.3141	0.7867		-0.2347	0.8313		459526	459876	+	WP_002994317.1		M5005_Spy_1408	rbfA		ribosome-binding factor A	C
SP5448_RS02410		0.4111	0.4392		1.381	0.01057		1.228	0.04059		460010	460996	-	WP_010922580.1		M5005_Spy_1407	sse		streptococcal secreted esterase Sse	NE
SP5448_RS02415		1.344	0.09686		1.579	0.05124		0.1943	0.8266		461168	461602	+	WP_010922579.1		M5005_Spy_1406	copY		copAB ATPases metal-fist type repressor	NE
SP5448_RS02420		0.3509	0.7387		-0.2434	0.8144		0.009604	0.9929		461602	463833	+	WP_011285671.1		M5005_Spy_1405	copA		copper-exporting ATPase	NE
SP5448_RS02425		-0.4586	0.7153		1.624	0.1828		-0.004496	0.9971		463847	464050	+	WP_010922577.1		M5005_Spy_1404	copZ		copper chaperone	NE
SP5448_RS02430		0.4515	0.6385		0.3203	0.7364		0.8267	0.4139		464254	465024	-	WP_002983505.1		M5005_Spy_1402	lacR.1		lactose phosphotransferase system repressor	NE
SP5448_RS02435		1.084	0.3011		0.5682	0.5844		0.7883	0.4686		465261	465734	+	WP_010922576.1		M5005_Spy_1401			PTS system, Galactose-specific IIA component	NE
SP5448_RS02440		-0.309	0.8135		-0.3058	0.8115		-1.162	0.3513		465727	466032	+	WP_010922575.1		M5005_Spy_1400			PTS system, Galactose-specific IIB component	NE
SP5448_RS02445		-0.3429	0.6035		0.5783	0.3854		0.5486	0.4539		466058	467509	+	WP_020750283.1		M5005_Spy_1399			PTS system, Galactose-specific IIC component	NE
SP5448_RS02450		0.5303	0.5272		1.442	0.08518		1.068	0.2425		467749	468174	+	WP_010922573.1		M5005_Spy_1398	lacA.1		galactose-6-phosphate isomerase lacA subunit	NE
SP5448_RS02455		-0.7993	0.4573		-0.08065	0.939		0.5493	0.6164		468189	468704	+	WP_010922572.1		M5005_Spy_1397	lacB.1		galactose-6-phosphate isomerase lacB subunit	NE
SP5448_RS02460		-0.3248	0.8054		-0.4944	0.7019		-1.176	0.3455		468869	469132	+	WP_011285074.1		M5005_Spy_1396	lacC.1		tagatose-6-phosphate kinase	NE
SP5448_RS02465		-0.07174	0.9207		0.6901	0.3405		1.547	0.05609		469214	470191	+	WP_002983521.1		M5005_Spy_1395	lacD.1		tagatose-bisphosphate aldolase; SpeB regulator	NE
SP5448_RS02470		-0.4728	0.5962		1.082	0.2223		1.591	0.09388		470388	471005	+	WP_002994286.1		M5005_Spy_1394			hypothetical membrane spanning protein	NE
SP5448_RS02475		0.033	0.9701		0.006807	0.9938		0.7535	0.4258		471007	471831	+	WP_010922570.1		M5005_Spy_1393			hydrolase, HAD superfamily	NE
SP5448_RS02480		1.688	0.1259		-0.3334	0.7618		-1.186	0.3099		471867	472424	-	WP_010922569.1		M5005_Spy_1392			transcriptional regulator, TetR family	NE
SP5448_RS02485		-0.8169	0.5016		-1.428	0.2319		-0.01373	0.9908		472717	473559	+	WP_010922568.1		M5005_Spy_1391			degV family protein	NE
SP5448_RS02490		-0.5979	0.3007		-1.25	0.03283		-1.274	0.04933		473688	474410	-	WP_002994282.1		M5005_Spy_1390			hypothetical protein	NE
SP5448_RS02495		-1.03	0.09269		-0.132	0.8314		-0.4393	0.5207		474612	476243	+	WP_010922567.1		M5005_Spy_1389			sodium-dependent phosphate transporter	NE
SP5448_RS02500		0.1546	0.8579		0.3178	0.7117		0.7377	0.4246		476361	477509	+	WP_010922566.1		M5005_Spy_1388	nagA		N-acetylglucosamine-6-phosphate deacetylase	NE
SP5448_RS02505		-0.5292	0.6115		0.006869	0.9947		0.101	0.9252		477631	478470	+	WP_011285666.1		M5005_Spy_1387			aldo/keto reductase family	NE
SP5448_RS02510		-0.7154	0.2693		-0.7521	0.2501		-2.732	0.000147		478602	479135	+	WP_002983542.1		M5005_Spy_1386			hypothetical membrane spanning protein	NE
SP5448_RS02515		0	1		0.5287	0.6443		0	1		479507	480424	+	WP_010922565.1		M5005_Spy_1385	glyQ		glycyl-tRNA synthetase alpha chain	E
SP5448_RS02520		0.615	0.5926		0.08366	0.9424		0.1703	0.8769		480802	482841	+	WP_010922564.1		M5005_Spy_1384	glyS		glycyl-tRNA synthetase beta chain	E
SP5448_RS02525		-0.3859	0.7656		-0.8625	0.5001		-0.8374	0.4893		482995	483252	+	WP_002983550.1		M5005_Spy_1383			hypothetical cytosolic protein	NC
SP5448_RS02530		0.6841	0.55		-2.065	0.07185		-2.718	0.0231		483379	483771	+	WP_011054910.1		M5005_Spy_1382			hypothetical membrane associated protein	NE
SP5448_RS02535		-0.02756	0.9796		-0.3584	0.7351		1.159	0.292		484132	485658	+	WP_002983556.1		M5005_Spy_1381	glpK		glycerol kinase	NE
SP5448_RS02540		-0.2461	0.8162		-0.6583	0.5267		0.123	0.9097		485674	487512	+	WP_010922563.1		M5005_Spy_1380	glpO		alpha-glycerophosphate oxidase	NE
SP5448_RS02545		-0.4504	0.7101		1.703	0.1492		1.876	0.1148		487514	488215	+	WP_011285665.1		M5005_Spy_1379	glpF		glycerol uptake facilitator protein	NE
SP5448_RS02550		-0.2316	0.8038		0.4892	0.5963		-0.2018	0.8374		488323	489669	+	WP_010922562.1		M5005_Spy_1378			NADH peroxidase	NE
SP5448_RS02555		-0.03002	0.9654		-0.6324	0.365		2.358	0.002361		489659	491158	+	WP_011285664.1		M5005_Spy_1377			trans-acting positive regulator	NE
SP5448_RS02560		-0.9899	0.3653		-1.365	0.2048		1.857	0.09437		491284	491928	+	WP_002983569.1		M5005_Spy_1376			transaldolase	NE
SP5448_RS02565		-0.1731	0.8784		0.007186	0.995		0.2687	0.8056		492146	494131	+	WP_010922560.1		M5005_Spy_1375	tkt		transketolase	NE
SP5448_RS02570		-0.07938	0.9329		-0.1673	0.8587		-0.9215	0.3698		494324	494590	+	WP_011285663.1		M5005_Spy_1374			hypothetical protein	NE
SP5448_RS02575		1.534	0.02659		2.559	0.0002397		1.658	0.02977		494624	495358	+	WP_002988881.1		M5005_Spy_1373			ABC transporter ATP-binding protein	NE
SP5448_RS02580		0.185	0.8191		-0.0115	0.9887		1.632	0.06243		495363	496991	+	WP_011285662.1		M5005_Spy_1372	proB		ABC transporter permease protein	NE
SP5448_RS02585		1.065	0.3501		0.1899	0.8661		1.198	0.2962		497056	497877	+	WP_010922558.1		M5005_Spy_1371			glutamate 5-kinase	NE
SP5448_RS02590		-0.351	0.7059		-0.09729	0.9159		0.7108	0.469		497870	499120	+	WP_010922557.1		M5005_Spy_1370	proA		gamma-glutamyl phosphate reductase	NE
SP5448_RS02600		-0.4743	0.6527		0.3116	0.7648		-0.4515	0.6806		499364	499570	+	WP_046735268.1
SP5448_RS02605		-0.03324	0.9796		-0.9764	0.4438		-0.9449	0.4478		499657	500607	+	WP_002988893.1		M5005_Spy_1368	mraW		S-adenosyl-methyltransferase	C
SP5448_RS02610		0.2648	0.8167		-0.04439	0.9693		0.1608	0.8834		500612	500935	+	WP_002988895.1		M5005_Spy_1367	ftsL		cell division protein	E
SP5448_RS02615		0.2684	0.8374		1.481	0.2451		1.244	0.3188		500939	503194	+	WP_002988898.1		M5005_Spy_1366	pbpX		division specific D,D-transpeptidase/cell division protein ftsI	E
SP5448_RS02620		-0.1711	0.8799		0.01191	0.9917		0.2747	0.8014		503196	504206	+	WP_002988900.1		M5005_Spy_1365			phospho-N-acetylmuramoyl-pentapeptide-transferase	E
SP5448_RS02625		0	1		0	1		0	1		504364	505707	+	WP_010922555.1		M5005_Spy_1364			ATP-dependent RNA helicase	E
SP5448_RS02630		0	1		0	1		0	1		505902	506705	+	WP_002988904.1		M5005_Spy_1363			amino acid ABC transporter permease protein	NE
SP5448_RS02635		-0.1777	0.8624		-1.184	0.2462		-0.5814	0.5903		506705	507448	+	WP_002983603.1		M5005_Spy_1362			transporter	NE
SP5448_RS02640		0.04588	0.9678		-0.07404	0.9486		0.1563	0.8864		507552	507776	+	WP_002988906.1		M5005_Spy_1361	aapA		hypothetical membrane associated protein	E
SP5448_RS02645		-0.1392	0.9121		-1.946	0.1184		-1.51	0.2205		507840	508757	+	WP_011285660.1		M5005_Spy_1360			thioredoxin reductase	C
SP5448_RS02650		1.021	0.1067		0.917	0.1519		1.35	0.05538		508926	510305	+	WP_002988920.1		M5005_Spy_1359			amino acid permease	NE
SP5448_RS02655		0.4148	0.6487		-0.7529	0.4055		1.504	0.1205		510476	511930	+	WP_010922553.1		M5005_Spy_1358	nadE		nicotinate phosphoribosyltransferase	E
SP5448_RS02660		-0.3591	0.7535		-0.3651	0.7518		-0.16	0.8841		511932	512756	+	WP_010922552.1		M5005_Spy_1357			NH(3)-dependent NAD(+) synthetase	E
SP5448_RS02665		-0.5949	0.6002		0.09253	0.9335		-1.115	0.3283		512941	514278	+	WP_002983616.1		M5005_Spy_1356	pepC		aminopeptidase C	NE
SP5448_RS02670		-0.2895	0.7985		-0.8133	0.4691		-0.05725	0.9608		514745	516910	-	WP_009880659.1		M5005_Spy_1355	pbp1A		multimodular transpeptidase-transglycosylase	E
SP5448_RS02675		0.5952	0.6271		0.8287	0.4988		0.5851	0.6134		516897	517496	-	WP_010922551.1		M5005_Spy_1354	recU		recombination protein	NE
SP5448_RS02680		0.01599	0.9877		0.3122	0.7609		2.161	0.04404		517577	518092	+	WP_010922550.1		M5005_Spy_1353			hypothetical cytosolic protein	NE
SP5448_RS02685		0	1		0	1		0	1		518214	518540	+	WP_002983626.1		M5005_Spy_1352			cell division initiation protein	NC
SP5448_RS02690		-0.007964	0.9937		-1.496	0.1373		0.6602	0.5325		518985	520139	+	WP_010922549.1		M5005_Spy_1351			methyltransferase	NE
SP5448_RS02695		-0.6211	0.566		-2.788	0.009917		-0.6956	0.5314		520153	521622	+	WP_011285659.1		M5005_Spy_1350			hypothetical protein	NE
SP5448_RS02700		-0.7084	0.5621		-1.029	0.3919		-2.005	0.1008		521767	522249	-	WP_002988938.1		M5005_Spy_1349	luxS		autoinducer-2 production protein	NE
SP5448_RS02705		-0.1924	0.8075		0.7656	0.3325		1.037	0.2287		522323	523654	-	WP_010922546.1		M5005_Spy_1348			D-beta-hydroxybutyrate permease	NE
SP5448_RS02710		-0.1828	0.8641		-1.189	0.2628		0.4189	0.7027		523725	524504	-	WP_002983637.1		M5005_Spy_1347			D-beta-hydroxybutyrate dehydrogenase	NE
SP5448_RS02715		-0.5112	0.6152		-0.615	0.5393		1.014	0.335		524537	525196	-	WP_010922545.1		M5005_Spy_1346	atoA		acetate CoA-transferase beta subunit	NE
SP5448_RS02720		-0.1292	0.8792		0.3194	0.7069		-0.5777	0.5456		525198	525848	-	WP_002983642.1		M5005_Spy_1345	atoD.1		acetate CoA-transferase alpha subunit	NE
SP5448_RS02725		-0.6981	0.3553		-1.045	0.1695		-0.2288	0.7915		525872	527059	-	WP_010922544.1		M5005_Spy_1344	atoB		acetyl-CoA acetyltransferase	NE
SP5448_RS02730		0.3717	0.6768		0.7314	0.4109		0.2116	0.8287		527261	528157	+	WP_011285658.1		M5005_Spy_1343	cufA		transcriptional regulators, LysR family	NE
SP5448_RS02735		0.6253	0.6043		-2.308	0.05539		-2.622	0.03154		528287	529894	+	WP_002988954.1		M5005_Spy_1342			hydrolase, HAD superfamily	NC
SP5448_RS02740		0.7437	0.5134		0.4155	0.7174		0	1		530004	530639	+	WP_010922542.1		M5005_Spy_1341	gmk		guanylate kinase	E
SP5448_RS02745		-0.1143	0.9238		-2.228	0.06111		-2.923	0.01613		530655	530972	+	WP_002983650.1		M5005_Spy_1340			DNA-directed RNA polymerase omega chain	NE
SP5448_RS02750		-3.496	0.005245		-2.492	0.03963		-0.4385	0.7129		531037	533421	+	WP_010922541.1		M5005_Spy_1339	priA		primosomal protein N'	C
SP5448_RS02755		-1.142	0.2992		0.3288	0.7567		3.71	0.0007222		533483	534418	+	WP_010922540.1		M5005_Spy_1338			methionyl-tRNA formyltransferase	E
SP5448_RS02760		-0.01303	0.9822		0.4938	0.4053		-0.0529	0.936		534408	535730	+	WP_002983657.1		M5005_Spy_1337	sunL		16S rRNA m(5)C 967 methyltransferase	NE
SP5448_RS02765		0.2372	0.8417		0.768	0.5205		1.21	0.2855		535768	536508	+	WP_002983660.1		M5005_Spy_1336	pppL		protein phosphatase 2C	E
SP5448_RS02770		-0.9273	0.4729		-1.112	0.3844		-1.09	0.3678		536505	538403	+	WP_010922538.1		M5005_Spy_1335			serine/threonine protein kinase	E
SP5448_RS02775		0.1366	0.9076		-0.9589	0.4089		-0.6995	0.5515		538526	539218	+	WP_011054833.1		M5005_Spy_1334	liaF, yvqF		transporter; LiaF, YvqF	NE
SP5448_RS02780		0.3946	0.7114		-1.405	0.188		-3.002	0.009915		539215	540219	+	WP_002991890.1		M5005_Spy_1333	liaS, yvqE		TCS-11 sensor kinase yvqE; hk03 Pneumo; LiaS	NE
SP5448_RS02785		0.8271	0.5211		2.316	0.06545		0.07104	0.9545		540212	540853	+	WP_010922536.1		M5005_Spy_1332	liaR, yvqC		TCS-11 response regulator yvqC; rr03 Pneumo; LiaR	NC
SP5448_RS02790		0.2521	0.7884		0.8528	0.36		-4.328	6.682e-05		540890	542290	+	WP_011285657.1		M5005_Spy_1331			peptidyl-prolyl cis-trans isomerase	NE
SP5448_RS02795		0.1954	0.8634		0.04277	0.9702		0.2877	0.7923		542290	542667	+	WP_002991882.1		M5005_Spy_1330			S1-type RNA-binding domain	C
SP5448_RS02800		0.3819	0.714		-0.2733	0.79		1.31	0.2224		542685	543626	-	WP_010922535.1		M5005_Spy_1329	cysM		cysteine synthase	NE
SP5448_RS02805		-0.4577	0.5681		-0.04736	0.9529		-1.199	0.1672		543754	544386	-	WP_009880468.1		M5005_Spy_1328			Xaa-Pro dipeptidase	NE
SP5448_RS02810		0.5745	0.5854		-1.121	0.2827		2.282	0.03522		544442	545767	+	WP_010922534.1		M5005_Spy_1327	comFA		COMF operon protein 1	NE
SP5448_RS02815		-0.02863	0.964		0.2328	0.7162		-0.1151	0.8706		545739	546404	+	WP_047343325.1		M5005_Spy_1326	comFC		COMF operon protein 3	NE
SP5448_RS02820		-0.7889	0.3713		-1.065	0.2254		1.421	0.1332		546484	547032	+	WP_002988974.1		M5005_Spy_1325			ribosome-associated factor Y	NE
SP5448_RS02865		0	1		0	1		0	1		554435	554968	-	WP_002983693.1		M5005_Spy_1321			hypothetical cytosolic protein	C
SP5448_RS02870		0.1815	0.8344		0.1639	0.8496		-0.8684	0.3525		555048	555824	-	WP_009880741.1		M5005_Spy_1320	recX		regulatory protein	NE
SP5448_RS02875		-0.355	0.7043		-0.5989	0.5214		1.868	0.06276		555939	557294	+	WP_010922532.1		M5005_Spy_1319			tRNA (uracil-5-)-methyltransferase	NE
SP5448_RS02880		-1.843	0.05665		-1.359	0.1548		2.446	0.01555		557959	559314	+	WP_010922531.1		M5005_Spy_1318	rocA		Orphan TCS Sensor kinase; regulates CovR	NE
SP5448_RS02885		-0.7792	0.4563		-0.6423	0.5321		2.08	0.05281		559415	562120	-	WP_010922530.1		M5005_Spy_1317			alpha-mannosidase; N-glycan system Pneumo	NE
SP5448_RS02890		0.1795	0.8787		-0.4562	0.6937		0.8438	0.4686		562135	563421	-	WP_011285655.1		M5005_Spy_1316			hypothetical protein	NE
SP5448_RS02895		-0.7862	0.4162		-0.2454	0.7974		-0.07972	0.9372		563554	564594	+	WP_002983707.1		M5005_Spy_1315			transcriptional regulator, GntR family	NE
SP5448_RS02900		0.3866	0.6551		-0.6763	0.4349		2.136	0.0239		564645	566339	+	WP_011285654.1		M5005_Spy_1314	hyl		hyaluronoglucosaminidase; N-glycan system Pneumo	NE
SP5448_RS02905		0.3141	0.7703		0.1768	0.8677		1.395	0.2051		566363	567805	+	WP_010922527.1		M5005_Spy_1313			beta-glucosidase; N-glycan system Pneumo	NE
SP5448_RS02910		-0.01345	0.99		0.2151	0.8384		-1.001	0.3622		568416	569294	-	WP_011285652.1		M5005_Spy_1311	glk		glucokinase, ROK;N-glycan system Pneumo	NE
SP5448_RS02915		-0.3418	0.5803		-0.6653	0.2875		1.061	0.1243		569490	570440	+	WP_011285651.1		M5005_Spy_1310	ngtP1		ABC unknown sugar permease protein	NE
SP5448_RS02920		-0.08639	0.9076		0.172	0.8184		0.7371	0.3881		570450	571376	+	WP_002988998.1		M5005_Spy_1309	ngtP2		ABC sugar permease; homolog N-glycan system Pneumo	NE
SP5448_RS02925		-0.1137	0.9108		-0.07849	0.9376		0.6992	0.5075		571457	572902	+	WP_002995654.1		M5005_Spy_1308	ngtS		ABC sugar-binding; homolog N-glycan system Pneumo	NE
SP5448_RS02930		0.2268	0.8346		1.619	0.1291		1.854	0.09408		573208	573813	+	WP_010922522.1		M5005_Spy_1307			hypothetical membrane spanning protein	NE
SP5448_RS02935		0.3553	0.608		0.5643	0.4185		-0.2413	0.7524		573803	575527	+	WP_011285650.1		M5005_Spy_1306	trxS		TCS-10 sensor kinase; TCS-X; yesM-like; hk07 (PDC, PDC domains)	NE
SP5448_RS02940		0.5181	0.4897		0.1923	0.7989		0.2752	0.747		575527	577011	+	WP_010922520.1		M5005_Spy_1305	trxR		TCS-10 response regulator; TCS-X; YesN-like	NE
SP5448_RS02945		0.08344	0.8709		0.8639	0.09808		1.129	0.05207		577031	580447	+	WP_011285649.1		M5005_Spy_1304	bgaA		beta-galactosidase	NE
SP5448_RS02950		0.3206	0.7958		-1.631	0.1789		-0.2377	0.8435		580585	581463	+	WP_002983735.1		M5005_Spy_1303	aroE		shikimate 5-dehydrogenase	NE
SP5448_RS02955		-0.5946	0.5054		-0.9344	0.2924		-0.6789	0.4761		581698	582453	+	WP_010922518.1		M5005_Spy_1302			SAM-dependent methyltransferase	NE
SP5448_RS02960		-0.7739	0.4147		-1.301	0.1671		-0.3603	0.7201		582506	582844	+	WP_002983741.1		M5005_Spy_1301			hypothetical cytosolic protein	NE
SP5448_RS02965		0.01252	0.9908		2.603	0.01451		0.1232	0.9115		582846	583151	+	WP_002983743.1		M5005_Spy_1300			hypothetical cytosolic protein	NE
SP5448_RS02970		-1.088	0.2309		-2.45	0.007325		-1.21	0.2245		583586	584659	-	WP_010922517.1		M5005_Spy_1298	aroB		3-dehydroquinate synthase	NE
SP5448_RS02975		0.06832	0.9408		-0.905	0.3214		-0.4644	0.6337		584715	585467	-	WP_002983746.1		M5005_Spy_1297			phospho-2-dehydro-3-deoxyheptonate aldolase	NE
SP5448_RS02985		-0.3311	0.7737		-0.5549	0.6328		-0.4186	0.7042		585946	586200	+	WP_002983750.1		M5005_Spy_1296			hypothetical protein	NE
SP5448_RS02990		-1.324	0.2752		0.1782	0.8799		-0.009523	0.9936		586218	586613	+	WP_002989018.1		M5005_Spy_1295			hypothetical cytosolic protein	NE
SP5448_RS02995		0.4664	0.7025		0.1484	0.9012		0.1424	0.9053		587038	587217	+	WP_002989020.1		M5005_Spy_1294			ribosomal-protein-serine acetyltransferase	NC
SP5448_RS03000		0.5888	0.6097		-0.928	0.4159		2.147	0.06119		587214	587777	+	WP_002989022.1		M5005_Spy_1293			hypothetical protein	NE
SP5448_RS03005		0.6066	0.5931		0.4476	0.6963		0	1		587779	590427	+	WP_010922514.1		M5005_Spy_1292	valS		valyl-tRNA synthetase	E
SP5448_RS03010		0.3453	0.6831		0.296	0.7257		0.6932	0.4467		590581	592989	+	WP_047343326.1		M5005_Spy_1291	cas3		CRISPR2-associated protein Cas3	NE
SP5448_RS03015		1.27	0.1388		1.179	0.1674		1.904	0.03812		593122	593850	+	WP_010922512.1		M5005_Spy_1290	cas5		CRISPR2-associated protein Cas5	NE
SP5448_RS03020		0.3701	0.6896		-0.5205	0.571		0.2188	0.8232		593850	595745	+	WP_011285646.1		M5005_Spy_1289	cds1		CRISPR2-associated protein Cds1	NE
SP5448_RS03025		0.27	0.8163		1.3	0.2541		-0.9416	0.4238		595750	596598	+	WP_010922510.1		M5005_Spy_1288	cds2		CRISPR2-associated protein Cds2	NE
SP5448_RS03030		0.4208	0.7259		0.5033	0.6667		2.748	0.02018		596600	597274	+	WP_003060901.1		M5005_Spy_1287	cas4		CRISPR2-associated protein Cas4	NE
SP5448_RS03035		0.1399	0.8591		-0.798	0.3121		1.041	0.226		597271	598296	+	WP_010922509.1		M5005_Spy_1286	cas1		CRISPR2-associated protein Cas1	NE
SP5448_RS03040		-0.2621	0.8137		-1.015	0.3566		2.966	0.008089		598307	598600	+	WP_002989044.1		M5005_Spy_1285	cas2		CRISPR2-associated protein Cas2	NE
SP5448_RS03045		-0.9034	0.3633		-1.235	0.213		-0.4502	0.674		599203	599913	+	WP_002983776.1		M5005_Spy_1284	ccdA		cytochrome c-type biogenesis protein	NE
SP5448_RS03050		0.6914	0.4927		2.293	0.02097		0.07617	0.9422		599926	600549	+	WP_002983778.1		M5005_Spy_1283	tlpA		thiol:disulfide interchange protein	NE
SP5448_RS03055		0.09706	0.9203		-0.9713	0.315		1.752	0.08763		600592	601698	+	WP_011285645.1		M5005_Spy_1282	msrA		peptide methionine sulfoxide reductase	NE
SP5448_RS03060		-0.6233	0.5878		-0.6795	0.5489		-1.429	0.2245		601786	602526	+	WP_010922507.1		M5005_Spy_1281	tcs9R		TCS-9 response regulator yesN-like	NE
SP5448_RS03065		-0.05213	0.9566		0.0013	0.9989		1.175	0.2439		602523	604256	+	WP_011285644.1		M5005_Spy_1280	tcs9S		TCS-9 sensor kinase yesM-like (PDC, PDC domains)	NC
SP5448_RS03070		-0.3539	0.7506		-0.1816	0.8684		0.8872	0.4306		604329	605408	+	WP_010922506.1		M5005_Spy_1279			hypothetical cytosolic protein	NE
SP5448_RS03075		-1.337	0.2518		0.3356	0.7678		-2.888	0.01653		605422	606138	+	WP_011285642.1		M5005_Spy_1278			hypothetical protein	NE
SP5448_RS03080		0.9579	0.2845		-0.5279	0.5574		0.02932	0.9764		606304	606777	-	WP_002989056.1		M5005_Spy_1277	ahrC.2		arginine repressor	NE
SP5448_RS03085		-0.5588	0.5763		-0.3291	0.7402		-1.366	0.2158		606919	607599	+	WP_002983795.1		M5005_Spy_1276			transcription regulator, crp family	NE
SP5448_RS03090		-0.413	0.7489		-2.141	0.0922		-2.02	0.1041		607873	609108	+	WP_002983803.1		M5005_Spy_1275	arcA		arginine deiminase	NE
SP5448_RS03095		-0.6292	0.5578		-0.4563	0.6655		-0.7506	0.4959		609208	609636	+	WP_010922504.1		M5005_Spy_1274			acetyltransferase	NE
SP5448_RS03100		0.04175	0.9739		0.8007	0.5216		2.469	0.04294		609676	610689	+	WP_002983808.1		M5005_Spy_1273	arcB		ornithine carbamoyltransferase	NE
SP5448_RS03105		-0.3618	0.6962		0.7229	0.4312		-1.487	0.1289		610859	612352	+	WP_002983810.1		M5005_Spy_1272	arcD		arginine/ornithine antiporter	NE
SP5448_RS03110		-0.3261	0.6554		-0.7021	0.3391		1.932	0.01649		612369	613700	+	WP_011285641.1		M5005_Spy_1271			Xaa-His dipeptidase	NE
SP5448_RS03115		-1.004	0.4018		-1.373	0.2439		-0.2056	0.8616		613720	614670	+	WP_010922501.1		M5005_Spy_1270	arcC		carbamate kinase	NE
SP5448_RS03120		0.2197	0.8317		-0.02249	0.9824		2.383	0.02527		614983	615975	+	WP_010922500.1		M5005_Spy_1269	asnA		aspartate--ammonia ligase	NE
SP5448_RS03125		-1.57	0.2349		-1.309	0.3134		-1.543	0.2131		616098	616637	+	WP_002983819.1		M5005_Spy_1268			methyltransferase	NE
SP5448_RS03130		0	1		0	1		1.096	0.3157		616627	617118	+	WP_002983821.1		M5005_Spy_1267			phosphopantetheine adenylyltransferase	E
SP5448_RS03135		-0.2606	0.8021		1.569	0.1249		-1.446	0.1982		617105	618142	+	WP_010922499.1		M5005_Spy_1266			ATP-dependent protease La	NE
SP5448_RS03145		-0.2798	0.7793		-1.804	0.06735		-1.438	0.167		619980	620600	+	WP_011285637.1		M5005_Spy_1262			transcriptional regulator	NE
SP5448_RS03150		-0.1621	0.7953		-0.1091	0.8629		0.9594	0.1809		620604	621683	+	WP_002992788.1		M5005_Spy_1261			radical SAM family enzyme	NE
SP5448_RS03155		0.7025	0.3709		1.235	0.1161		0.4411	0.6048		621765	622391	-	WP_010922497.1		M5005_Spy_1260			prepilin peptidase family	NE
SP5448_RS03160		-0.6489	0.5674		-1.144	0.3072		1.061	0.3505		622619	623146	+	WP_002983837.1		M5005_Spy_1259	dpr		non-specific DNA-binding protein/iron-binding ferritin-like antioxidant protein	NE
SP5448_RS03165		-0.4992	0.6201		-0.5501	0.5802		1.67	0.1108		623288	623491	+	WP_002983840.1		M5005_Spy_1258			hypothetical cytosolic protein	NE
SP5448_RS03170		-0.767	0.4227		-1.379	0.1472		-0.3703	0.716		623496	624467	+	WP_009880399.1		M5005_Spy_1257	glcK		glucokinase/Xylose repressor	NE
SP5448_RS03175		0.7142	0.4221		1.474	0.09664		-1.035	0.2932		624477	624866	+	WP_002995894.1		M5005_Spy_1256			rhodanese-related sulfurtransferases	NE
SP5448_RS03180		-0.5608	0.6021		-1.1	0.3029		0.7888	0.4751		625049	626890	+	WP_002983847.1		M5005_Spy_1255	typA		GTP-binding protein	NC
SP5448_RS03185		-0.7914	0.4945		-2.801	0.01419		-2.072	0.07398		627012	627263	+	WP_002995892.1		M5005_Spy_1254			hypothetical membrane spanning protein	NE
SP5448_RS03190		0	1		0	1		1.717	0.1466		627633	628991	+	WP_010922496.1		M5005_Spy_1253	murD		UDP-N-acetylmuramoylalanine--D-glutamate ligase	E
SP5448_RS03195		0	1		0	1		0	1		628991	630073	+	WP_014407695.1		M5005_Spy_1252	murG		UDP-N-acetylglucosamine--N-acetylmuramyl-(pentapeptide) pyrophosphoryl-undecaprenol N-acetylglucosamine transferase	E
SP5448_RS03200		-0.0226	0.9808		-0.9817	0.2931		-1.276	0.2037		630074	631222	+	WP_010922494.1		M5005_Spy_1251	divIB		cell division protein	NC
SP5448_RS03205		0	1		0	1		0	1		631434	632798	+	WP_002983860.1		M5005_Spy_1250	ftsA		cell division protein	E
SP5448_RS03210		-0.7177	0.5318		-0.5399	0.6414		-0.449	0.6835		632822	634141	+	WP_002983862.1		M5005_Spy_1249	ftsZ		cell division protein	E
SP5448_RS03215		-0.9131	0.4324		-0.9997	0.3831		-0.5391	0.6459		634144	634815	+	WP_010922493.1		M5005_Spy_1248			pyridoxal-5'-phosphate family protein	NE
SP5448_RS03220		0	1		0	1		0	1		634827	635483	+	WP_002995878.1		M5005_Spy_1247			hypothetical cytosolic protein	NE
SP5448_RS03225		-0.1123	0.9303		-0.2369	0.8522		0.4189	0.7285		635488	635742	+	WP_002983869.1		M5005_Spy_1246			integral membrane protein	NC
SP5448_RS03230		-0.7471	0.3932		-1.087	0.2126		1.008	0.2838		635742	636533	+	WP_010922492.1		M5005_Spy_1245			RNA binding protein	NE
SP5448_RS03235		-0.3571	0.7576		-0.488	0.6688		-0.8653	0.4666		636543	637301	+	WP_002989099.1		M5005_Spy_1244	divIVA		cell division initiation protein	E
SP5448_RS03240		0.4545	0.6921		1.096	0.3448		0	1		637574	640375	+	WP_011285636.1		M5005_Spy_1243	ileS		isoleucyl-tRNA synthetase	E
SP5448_RS03245		-0.1413	0.9034		0.5353	0.6374		0.5281	0.6499		640640	640942	-	WP_010922490.1		M5005_Spy_1242			hypothetical cytosolic protein	NE
SP5448_RS03250		-0.5277	0.6777		0.1811	0.8839		-1.243	0.3154		640993	641448	-	WP_002989103.1		M5005_Spy_1241	mutT		mutator protein (7,8-dihydro-8-oxoguanine-triphosphatase)	NE
SP5448_RS03255		0.09043	0.9334		0.7603	0.4737		1.492	0.1758		641576	643858	-	WP_010922489.1		M5005_Spy_1240	clpE		ATP-dependent clp protease ATP-binding subunit	NE
SP5448_RS03260		-0.1367	0.9044		-0.1999	0.862		0.02805	0.9796		644156	644386	+	WP_002983885.1		M5005_Spy_1239			hypothetical cytosolic protein	NC
SP5448_RS03265		-0.08257	0.9353		-2.659	0.009263		-1.222	0.2549		644513	645199	+	WP_002983887.1		M5005_Spy_1238	artQ		arginine transport system permease protein	NE
SP5448_RS03270		-0.7518	0.5136		-0.8397	0.4595		-1.419	0.2259		645199	645933	+	WP_010922488.1		M5005_Spy_1237	artP		arginine transport ATP-binding protein	NE
SP5448_RS03275		0.2074	0.7726		1.136	0.1155		0.4047	0.6079		646082	647491	+	WP_010922487.1		M5005_Spy_1236	phr		deoxyribodipyrimidine photolyase	NE
SP5448_RS03280		0.3314	0.6857		-1.191	0.1457		-1.994	0.0246		647669	649363	+	WP_002989112.1		M5005_Spy_1235			phosphoglucomutase	NE
SP5448_RS03285		-0.2561	0.8453		-1.08	0.403		-0.9631	0.4323		649571	650425	+	WP_010922486.1		M5005_Spy_1234	folD		methylenetetrahydrofolate dehydrogenase (NADP+)/methenyltetrahydrofolate cyclohydrolase	C
SP5448_RS03290		-0.5313	0.5567		-0.01445	0.9872		1.367	0.1554		650578	651918	+	WP_002992349.1		M5005_Spy_1233			exodeoxyribonuclease VII large subunit	NE
SP5448_RS03295		0	1		0	1		0	1		651896	652111	+	WP_002983901.1		M5005_Spy_1232	xseB		exodeoxyribonuclease VII small subunit	NE
SP5448_RS03300		-1.555	0.2259		-1.519	0.2326		-1.053	0.3825		652111	652983	+	WP_003056941.1		M5005_Spy_1231	fps		dimethylallyltransferase/geranyltranstransferase	NE
SP5448_RS03305		-1.022	0.3454		-1.248	0.2426		0.6265	0.5704		652976	653803	+	WP_003056952.1		M5005_Spy_1230			hemolysin	NE
SP5448_RS03310		-0.1292	0.8743		-0.1221	0.8812		0.3472	0.6968		653790	654260	+	WP_002983907.1		M5005_Spy_1229	argR1		arginine repressor	NE
SP5448_RS03315		-0.6523	0.4654		-0.5901	0.5091		1.137	0.2431		654282	655943	+	WP_010922485.1		M5005_Spy_1228	recN		DNA repair protein	NE
SP5448_RS03320		0.07117	0.9351		0.04717	0.9569		-0.326	0.7342		656115	657056	+	WP_011285633.1		M5005_Spy_1227			hypothetical protein	NE
SP5448_RS03325		-0.369	0.7258		-0.0533	0.959		-1.747	0.1163		657272	658123	+	WP_002983913.1		M5005_Spy_1226			degV family protein	NE
SP5448_RS03330		3.204e-06	1		0.04037	0.9703		-1.679	0.137		658116	658958	+	WP_002992620.1		M5005_Spy_1225			lipase/acylhydrolase with GDSL-like motif	NE
SP5448_RS03335		-0.2424	0.7671		-0.7503	0.3588		1.185	0.1809		658936	659523	+	WP_010922482.1		M5005_Spy_1224			hypothetical membrane associated protein	NE
SP5448_RS03340		-0.8643	0.4432		-1.431	0.1997		-3.259	0.005828		659622	659897	+	WP_002983920.1		M5005_Spy_1223	hlp		DNA-binding protein HU;histone-like; essential gene	NC
SP5448_RS03345		1.074	0.3023		-0.6221	0.5488		-0.4692	0.6686		659987	661129	-	WP_003051793.1		M5005_Spy_1222	int.2		phi5005.2 integrase	NE
SP5448_RS03350		-0.1787	0.7934		0.4398	0.5223		0.8249	0.2772		661253	661519	-	WP_011285632.1		M5005_Spy_1221			phage protein	NE
SP5448_RS03355		0.211	0.8449		0.4731	0.6546		1.565	0.1544		661531	661911	-	WP_002994744.1		M5005_Spy_1220			phage protein	NE
SP5448_RS03360		0.831	0.4674		0.8583	0.4454		1.685	0.144		661915	662262	-	WP_011285631.1		M5005_Spy_1219			phage transcriptional regulator, Cro/CI family	E
SP5448_RS03365		-0.08223	0.9491		-1.938	0.1274		-1.298	0.2958		663416	663607	+	WP_002993390.1		M5005_Spy_1218			phage protein	NE
SP5448_RS03370		-0.0299	0.9794		-0.2706	0.8163		-0.3415	0.7571		663619	664335	+	WP_011285630.1		M5005_Spy_1217			phage antirepressor protein	NE
SP5448_RS03375		0.05985	0.9479		-0.5693	0.5328		1.123	0.2529		664367	664633	+	WP_010922204.1		M5005_Spy_1216			phage protein	NE
SP5448_RS03380		-0.3373	0.7354		-0.2621	0.79		-1.762	0.08941		664568	665374	-	WP_011285629.1		M5005_Spy_1215			phage protein	NE
SP5448_RS03385		-0.13	0.9106		-0.1156	0.9192		0.8038	0.4862		665516	665755	-	WP_011284879.1		M5005_Spy_1214			phage protein	NE
SP5448_RS03390		-0.5147	0.6514		-0.211	0.8547		-0.09763	0.929		665922	666107	+	WP_011054585.1		M5005_Spy_1213			phage protein	NC
SP5448_RS03395		0.6765	0.5609		-1.781	0.1243		-2.057	0.08529		666185	666496	+	WP_002990080.1		M5005_Spy_1212	xis		excisionase	NE
SP5448_RS03400		1.524	0.121		0.4059	0.6792		-2.42	0.02967		666498	666683	+	WP_011285628.1		M5005_Spy_1211			phage protein	NC
SP5448_RS03405		1.706	0.1806		-0.9697	0.4409		-1.492	0.2296		666783	667022	+	WP_002985390.1		M5005_Spy_1210			phage replication protein	NE
SP5448_RS03410		-0.8627	0.4742		-2.766	0.02112		-2.477	0.04106		667167	667556	+	WP_011285627.1		M5005_Spy_1209			DNA replication protein	NE
SP5448_RS03415		0.9538	0.4028		0.4884	0.6619		-0.8729	0.4503		667537	667770	+	WP_002985387.1		M5005_Spy_1208			phage protein	NE
SP5448_RS03420		-0.495	0.6944		-1.196	0.3342		-0.9004	0.4642		667916	668122	+	WP_011017565.1		M5005_Spy_1206			phage protein	NE
SP5448_RS03425		-0.4427	0.7279		-2.141	0.08879		-0.0674	0.9562		668178	668507	+	WP_002988359.1		M5005_Spy_1205			phage protein	NE
SP5448_RS03430		-0.1069	0.8919		0.2186	0.7814		1.54	0.07139		668510	669439	+	WP_011285626.1		M5005_Spy_1204			recT protein	NE
SP5448_RS03435		1.026	0.3233		-1.293	0.2149		-2.58	0.02409		669436	670233	+	WP_011285625.1		M5005_Spy_1203			phage protein	NE
SP5448_RS03440		1.18	0.3432		0.5071	0.6822		0.2085	0.8585		670588	670929	+	WP_002988364.1		M5005_Spy_1201			phage protein	NE
SP5448_RS03445		0.6555	0.4303		-0.007566	0.9927		-1.096	0.2331		670926	671438	+	WP_002988366.1		M5005_Spy_1200			phage protein	NE
SP5448_RS03450		0.9502	0.3365		-1.896	0.05621		-0.8206	0.4377		671522	671791	+	WP_002988369.1		M5005_Spy_1199			phage protein	NE
SP5448_RS03455		0.547	0.6746		0.1581	0.9021		-0.2267	0.8523		671793	672428	+	WP_010922070.1		M5005_Spy_1198			phage protein	NE
SP5448_RS03460		0.4012	0.734		-0.7239	0.5343		1.266	0.2779		672696	673115	+	WP_010922470.1		M5005_Spy_1197			phage protein	NE
SP5448_RS03465		0.08714	0.9322		0.07508	0.9412		-1.311	0.2457		673224	673568	+	WP_010922469.1		M5005_Spy_1196			HNH endonuclease family protein	NE
SP5448_RS03470		0.8196	0.4196		-1.008	0.3228		-2.437	0.03165		673717	674073	+	WP_002994106.1		M5005_Spy_1195			phage protein	NE
SP5448_RS03475		0.4363	0.5963		1.881	0.02207		0.4526	0.6106		674070	675338	+	WP_010922468.1		M5005_Spy_1194			phage protein	NE
SP5448_RS03480		0.1819	0.8536		-0.3211	0.7414		1.806	0.07874		675331	676824	+	WP_015446231.1		M5005_Spy_1193			phage protein	NE
SP5448_RS03485		1.157	0.2415		0.2057	0.8332		1.002	0.332		676830	677054	+	WP_010922466.1		M5005_Spy_1192			phage protein	NE
SP5448_RS03490											677104	677283	+	WP_015055972.1
SP5448_RS03495		0.3079	0.7407		-1.481	0.1096		1.154	0.2438		677276	677542	+	WP_010922464.1		M5005_Spy_1190			phage protein	NE
SP5448_RS03500		0.207	0.8061		0.05227	0.9504		0.8598	0.3429		677652	679067	+	WP_011285619.1		M5005_Spy_1189			phage terminase	NE
SP5448_RS03505		-0.2561	0.83		-1.24	0.2911		2.444	0.03667		679148	679609	+	WP_011285618.1		M5005_Spy_1188			phage protein	NE
SP5448_RS03510		0.3472	0.7351		-0.1065	0.9161		0.5528	0.6023		679634	680545	+	WP_010922461.1		M5005_Spy_1187			phage structural protein	NE
SP5448_RS03515		-0.4237	0.7202		0.9359	0.4164		0.4226	0.7216		680545	680745	+	WP_010922460.1		M5005_Spy_1186			phage protein	NE
SP5448_RS03520		-0.2432	0.8439		-2.04	0.09565		-1.831	0.135		680755	681177	+	WP_010922459.1		M5005_Spy_1185			phage protein	NE
SP5448_RS03525		0.8197	0.5163		-1.464	0.2417		-1.753	0.1568		681137	681475	+	WP_011285617.1		M5005_Spy_1184			phage protein	NE
SP5448_RS03530		-0.2583	0.8425		-0.9939	0.4354		0.5489	0.6565		681468	681704	+	WP_010922457.1		M5005_Spy_1183			phage protein	NE
SP5448_RS03535		0.4786	0.6822		0.4253	0.7091		2.328	0.04525		681705	682040	+	WP_011285616.1		M5005_Spy_1182			phage protein	NE
SP5448_RS03540		0.01181	0.9906		-1.658	0.1001		-2.841	0.0118		682052	682645	+	WP_010922456.1		M5005_Spy_1181			major tail protein	NE
SP5448_RS03545		0.2664	0.8404		-1.009	0.4374		-0.948	0.445		682656	682919	+	WP_010922455.1		M5005_Spy_1180			phage protein	NE
SP5448_RS03550		-1.046	0.3631		-2.661	0.02041		3.082	0.006717		682934	683305	+	WP_010922454.1		M5005_Spy_1179			phage protein	NE
SP5448_RS03555		-1.099	0.1674		-0.2683	0.7361		-2.197	0.01099		683305	685662	+	WP_010922453.1		M5005_Spy_1178			phage protein	NE
SP5448_RS03560		-0.4912	0.489		0.457	0.5223		0.1272	0.8706		685659	686354	+	WP_010922452.1		M5005_Spy_1177			phage protein	NE
SP5448_RS03565		-0.4546	0.5989		-1.659	0.05395		0.373	0.6874		686351	688219	+	WP_011285615.1		M5005_Spy_1176			phage infection protein	NE
SP5448_RS03570		-0.03612	0.9683		-4.661	6.229e-07		-2.494	0.01312		688231	688668	+	WP_011285614.1		M5005_Spy_1175			phage protein	NE
SP5448_RS03575		0.06191	0.9513		0.998	0.3181		0.9092	0.3891		688665	689282	+	WP_011285613.1		M5005_Spy_1174			phage protein	NE
SP5448_RS03580		0.9769	0.3428		-0.4401	0.6674		0.72	0.5023		689292	689567	+	WP_002987582.1		M5005_Spy_1173			phage protein	NE
SP5448_RS03585		-0.06744	0.9562		-0.1707	0.8875		0.05785	0.962		689564	689791	+	WP_003058873.1		M5005_Spy_1172			holin	NE
SP5448_RS03595		1.426	0.05937		1.816	0.0167		1.212	0.1422		689907	691112	+	WP_010922446.1		M5005_Spy_1171			phage-associated cell wall hydrolase	NE
SP5448_RS03600		0.7413	0.4763		0.8436	0.4103		-0.3533	0.7428		691182	691616	-	WP_011017966.1		M5005_Spy_1170			hypothetical membrane associated protein	NE
SP5448_RS03605		0.9061	0.3181		0.4837	0.5919		1.703	0.07838		691887	692693	-	WP_002984424.1		M5005_Spy_1169	spd3		streptodornase	NE
SP5448_RS03610		0.398	0.743		-1.415	0.2371		2.891	0.0144		692926	693108	+	WP_011017964.1		M5005_Spy_1168			phage protein	NC
SP5448_RS03615		-0.1961	0.8747		0.6153	0.6105		3.015	0.01269		693639	695501	+	WP_011285610.1		M5005_Spy_1167	pmtA		Ferrous iron and cobalt efflux system; MtsR, PerR regulated	NE
SP5448_RS03620		-0.3222	0.6692		-1.214	0.1086		0.9285	0.2603		695801	696736	-	WP_010922443.1		M5005_Spy_1165	pyrD		dihydroorotate dehydrogenase	NE
SP5448_RS03625		0.01326	0.9908		-0.2336	0.8399		-0.04897	0.9645		696975	697670	+	WP_002983928.1		M5005_Spy_1164	gpmA		phosphoglycerate mutase	NC
SP5448_RS03630		0.7529	0.265		0.8996	0.1866		-0.4175	0.5786		697777	698298	+	WP_002983930.1		M5005_Spy_1163			transcriptional regulator, biotin repressor family	NE
SP5448_RS03635		0.2765	0.7929		-1.639	0.121		-3.064	0.00824		698459	699001	+	WP_002989140.1		M5005_Spy_1162			hypothetical protein	NE
SP5448_RS03640		0.5159	0.6029		0.2272	0.8167		0.8729	0.3998		699125	699904	+	WP_002989141.1		M5005_Spy_1161			formate transporter	NE
SP5448_RS03645		-0.5647	0.5789		-0.8697	0.3905		-0.6823	0.5298		700465	700656	+	WP_011285608.1		M5005_Spy_1160			penicillin-binding protein	NE
SP5448_RS03650		-0.3396	0.7648		-0.0277	0.9807		0.09213	0.9328		700703	701299	+	WP_002983939.1		M5005_Spy_1159	recR		recombination protein	NE
SP5448_RS03655		-0.402	0.7612		-0.8302	0.5228		-1.077	0.385		701400	702446	+	WP_002989146.1		M5005_Spy_1158	ddlA		D-alanine--D-alanine ligase	E
SP5448_RS03660		-0.9306	0.4817		-1.704	0.1893		-1.233	0.3213		702637	704028	+	WP_010922441.1		M5005_Spy_1157	murF		UDP-N-acetylmuramoylalanine-D-glutamyl-lysine--D-alanyl-D-alanine ligase	E
SP5448_RS03665		-1.269	0.1223		0.4746	0.562		-0.5455	0.5444		704108	704803	+	WP_011285607.1		M5005_Spy_1156			hypothetical membrane spanning protein	NE
SP5448_RS03670		-1.279	0.1891		-0.3406	0.7246		-0.6607	0.5253		705051	706595	+	WP_002989155.1		M5005_Spy_1155	prfC		bacterial peptide chain release factor 3 (RF-3)	NE
SP5448_RS03675		-0.6866	0.5636		-0.4883	0.6762		-0.4834	0.6815		706902	708521	+	WP_002989158.1		M5005_Spy_1154	deaD		ATP-dependent RNA helicase	NE
SP5448_RS03680		-0.4731	0.5676		-0.7184	0.3865		0.3392	0.7124		708649	710649	+	WP_010922439.1		M5005_Spy_1152			kup system potassium uptake protein	NE
SP5448_RS03685		0.02302	0.9761		0.4273	0.5793		0.6517	0.4528		710673	710951	-	WP_002989164.1		M5005_Spy_1151			hypothetical protein with endo/excinuclease domain	NE
SP5448_RS03690		-0.9847	0.372		-0.206	0.849		0.2769	0.8045		710941	711798	-	WP_032459874.1		M5005_Spy_1150			methyltransferase	NE
SP5448_RS03695		0.2322	0.8375		0	1		0	1		711835	712575	+	WP_011285604.1		M5005_Spy_1149			1-acyl-sn-glycerol-3-phosphate acyltransferase	E
SP5448_RS03700		-0.3035	0.7425		0.4064	0.6578		-0.6872	0.4907		712775	713437	+	WP_002983967.1		M5005_Spy_1148			COME operon protein 1	NE
SP5448_RS03705		0.3735	0.7098		0.8175	0.4091		1.457	0.1626		713418	715661	+	WP_010922436.1		M5005_Spy_1147	comEC		COME operon protein 3	NE
SP5448_RS03710		-0.06547	0.9548		-0.5826	0.6164		-0.4855	0.66		715732	716772	+	WP_010922435.1		M5005_Spy_1146			DNA polymerase III, delta subunit	E
SP5448_RS03715		-1.489	0.1661		-1.382	0.1934		0.9124	0.4061		716869	717474	+	WP_010922434.1		M5005_Spy_1145	sodA		superoxide dismutase	NE
SP5448_RS03720		-1.072	0.3789		0.9037	0.4457		-0.132	0.9122		717641	717868	+	WP_010922433.1		M5005_Spy_1144			hypothetical protein	NE
SP5448_RS03725		1.209	0.3191		-0.6916	0.5657		-1.625	0.1845		717853	718101	+	WP_010922432.1		M5005_Spy_1143			hypothetical protein	NE
SP5448_RS03730		-0.3016	0.7224		0.1196	0.8874		0.09244	0.9192		718098	718688	+	WP_010922431.1		M5005_Spy_1142			hypothetical protein	NE
SP5448_RS03735		-0.6036	0.4228		-0.1137	0.8805		-0.6119	0.4653		718802	720022	-	WP_010922430.1		M5005_Spy_1141			hypothetical cytosolic protein	NE
SP5448_RS03740		-0.1846	0.881		-0.9844	0.4179		-1.669	0.1737		720029	721057	-	WP_010922429.1		M5005_Spy_1140	queA		S-adenosylmethionine:tRNA ribosyltransferase-isomerase	NE
SP5448_RS03745		0.4701	0.6477		-0.8665	0.3971		-1.291	0.2339		721259	721963	+	WP_010922428.1		M5005_Spy_1139	nagB		glucosamine-6-phosphate isomerase	NE
SP5448_RS03750		-0.7742	0.4804		-0.2904	0.7883		-0.5965	0.6025		722082	722798	+	WP_002995774.1		M5005_Spy_1138			ribosomal small subunit pseudouridine synthase A	NE
SP5448_RS03755		0.588	0.5035		1.206	0.1685		1.4	0.1399		723093	724055	+	WP_010922426.1		M5005_Spy_1137			putative competence protein/transcription factor	NE
SP5448_RS03760		1.168	0.2178		1.545	0.0995		0.1995	0.8413		724068	725873	+	WP_010922425.1		M5005_Spy_1136	pepB		oligoendopeptidase F	NE
SP5448_RS03765		0.09218	0.9198		0.859	0.3444		1.779	0.06645		726249	727445	+	WP_002995765.1		M5005_Spy_1135			oxalate/formate antiporter	NE
SP5448_RS03770		-0.03238	0.977		0.3576	0.7447		-0.1707	0.8801		727511	728218	+	WP_002989211.1		M5005_Spy_1134			O-methyltransferase	NE
SP5448_RS03775		-1.166	0.3566		0.4702	0.7031		-1.788	0.1477		728281	729336	+	WP_002984003.1		M5005_Spy_1133	surA		peptidyl-prolyl cis-trans isomerase	NE
SP5448_RS03780		-0.1221	0.8966		-1.091	0.2489		-1.94	0.06256		729723	732341	+	WP_010922424.1		M5005_Spy_1132	alaS		alanyl-tRNA synthetase	E
SP5448_RS03785		-0.2905	0.8003		0.4905	0.6728		-0.0336	0.9756		732702	732917	+	WP_002989220.1		M5005_Spy_1131			transcriptional regulator, Cro/CI family	NC
SP5448_RS03790		-0.6129	0.6292		-0.6655	0.5894		2.522	0.03941		732914	733675	+	WP_010922423.1		M5005_Spy_1130			hypothetical membrane spanning protein	NE
SP5448_RS03795		-0.04267	0.9672		-0.3105	0.7609		-0.03263	0.9757		733694	734389	+	WP_011285602.1		M5005_Spy_1129			CAAX amino terminal protease family	NE
SP5448_RS03800		0.6091	0.6228		1.178	0.3293		-1.304	0.291		734481	734666	-	WP_015055969.1
SP5448_RS03810		0	1		0	1		0	1		735015	735311	-	WP_011285600.1
SP5448_RS03815		0	1		0.4013	0.7258		0	1		735344	735637	-	WP_015055968.1
SP5448_RS03820		0.4244	0.6975		-0.8046	0.456		-0.1315	0.9061		735775	737088	-	WP_010922421.1		M5005_Spy_1125			chloride channel protein	NE
SP5448_RS03825		-0.6804	0.4725		2.57	0.003469		4.135	1.281e-05		737063	738022	-	WP_002987365.1		M5005_Spy_1124	nrdF.2		ribonucleoside-diphosphate reductase beta chain	NE
SP5448_RS03830		-0.3929	0.7322		-0.281	0.8085		0.8303	0.452		738355	740514	-	WP_010922420.1		M5005_Spy_1123	nrdE.2		ribonucleoside-diphosphate reductase alpha chain	NE
SP5448_RS03835		-0.5672	0.6182		-0.3898	0.7347		-0.1539	0.8883		740534	740752	-	WP_002989242.1		M5005_Spy_1122	nrdH		glutaredoxin	NE
SP5448_RS03840		0	1		0	1		0	1		741145	741408	+	WP_002984031.1		M5005_Spy_1121	ptsH		phosphocarrier protein HPr	C
SP5448_RS03845		-0.1464	0.8985		-0.2229	0.8474		0.06933	0.9498		741413	743146	+	WP_002984033.1		M5005_Spy_1120	pstI		phosphoenolpyruvate-protein phosphotransferase	C
SP5448_RS03850		0.0946	0.9336		0.01597	0.9889		0.4599	0.6739		743331	744758	+	WP_010922418.1		M5005_Spy_1119	gapN		NADP-dependent glyceraldehyde-3-phosphate dehydrogenase	E
SP5448_RS03855		0.8708	0.3378		0.8761	0.3314		0.9428	0.3283		744853	746127	+	WP_010922417.1		M5005_Spy_1118			peptidoglycan N-acetylglucosamine deacetylase	NE
SP5448_RS03860		0.3098	0.8149		0.3043	0.8146		-0.5387	0.6652		746238	747323	-	WP_011285597.1		M5005_Spy_1117	deaD2		ATP-dependent RNA helicase	NE
SP5448_RS03865		0.06637	0.9467		0.1511	0.8779		2.829	0.006471		747421	748047	+	WP_002984060.1		M5005_Spy_1116	udk		uridine kinase	NE
SP5448_RS03870		-0.3572	0.6917		-0.852	0.3417		-1.046	0.2788		748127	748390	+	WP_010922415.1		M5005_Spy_1115			hypothetical membrane spanning protein	NE
SP5448_RS03875		-0.5961	0.2852		0.1624	0.7739		0.9114	0.163		748443	749252	-	WP_002989260.1		M5005_Spy_1114			hypothetical membrane spanning protein	NE
SP5448_RS03880		-1.354	0.2297		0.2691	0.807		-2.088	0.07719		749397	749894	+	WP_010922414.1		M5005_Spy_1113			GAF domain-containing proteins	NE
SP5448_RS03885		-0.3602	0.7759		-0.2028	0.8716		1.94	0.1048		749894	751564	+	WP_010922413.1		M5005_Spy_1112			DNA polymerase III subunit gamma/tau	E
SP5448_RS03890		0.1166	0.9227		-0.4165	0.7244		-0.01614	0.9891		751837	752778	-	WP_002984078.1		M5005_Spy_1110	birA		biotin operon repressor/biotin--[acetyl-CoA-carboxylase] synthetase	E
SP5448_RS03895		0.581	0.5234		-1.82	0.04456		-0.3274	0.7362		752982	755360	+	WP_010922411.1		M5005_Spy_1109	inlA		internalin protein	NE
SP5448_RS03900		1.548	0.2063		-1.055	0.3832		-1.984	0.1045		755897	757093	+	WP_010922410.1		M5005_Spy_1108	metK2		S-adenosylmethionine synthetase	E
SP5448_RS03905		-0.7664	0.4267		0.02803	0.9766		-0.4801	0.6467		757267	758526	+	WP_002989295.1		M5005_Spy_1107	murZ		UDP-N-acetylglucosamine 1-carboxyvinyl transferase	NE
SP5448_RS03910		1.017	0.3568		1.144	0.2945		-1.142	0.3247		758884	759537	+	WP_010922409.1		M5005_Spy_1106	grab		protein G-related alpha 2M-binding protein	NE
SP5448_RS03920		-0.6635	0.5233		-1.668	0.1067		-0.7964	0.4625		760326	761609	+	WP_002989302.1		M5005_Spy_1104			cytosolic protein containing multiple CBS domains	NE
SP5448_RS03925		0	1		0	1		0	1		761625	762485	+	WP_002984100.1		M5005_Spy_1103	map		methionine aminopeptidase	E
SP5448_RS03930		1.099	0.2659		0.6448	0.5108		-1.105	0.2982		762487	763452	+	WP_010922408.1		M5005_Spy_1102			ribonuclease BN	NE
SP5448_RS03935		-0.5245	0.6162		-1.336	0.1958		-2.365	0.03058		763563	764846	+	WP_015055964.1		M5005_Spy_1101			3-phosphoshikimate 1-carboxyvinyltransferase	NE
SP5448_RS03940		-0.281	0.8162		-1.535	0.1943		-0.2518	0.832		764839	765330	+	WP_010922406.1		M5005_Spy_1100	aroK		shikimate kinase	NE
SP5448_RS03945		-0.1671	0.8353		-2.183	0.006772		-0.9545	0.2802		765538	766989	+	WP_010922405.1		M5005_Spy_1099			transcriptional regulator, LytR family	NE
SP5448_RS03950		-0.08273	0.9255		-0.8019	0.3663		-2.284	0.02516		767038	768426	+	WP_010922404.1		M5005_Spy_1098			tRNA (uracil-5-)-methyltransferase	NE
SP5448_RS03960		0.5529	0.6327		0.1292	0.9089		1.633	0.1572		769328	769729	+	WP_002984115.1		M5005_Spy_1096			thioesterase superfamily protein	NE
SP5448_RS03965		0.9769	0.3553		0.7601	0.4641		0.609	0.5741		769836	771320	-	WP_015055963.1		M5005_Spy_1095			hypothetical cytosolic protein	NE
SP5448_RS03970		0.5343	0.4877		-0.01033	0.9893		-0.8951	0.2961		771694	772914	+	WP_010922401.1		M5005_Spy_1094			transporter, MFS superfamily	NE
SP5448_RS03975		-0.05506	0.9531		-0.4046	0.6644		0.7092	0.4791		773034	773399	-	WP_002984124.1		M5005_Spy_1093			hypothetical protein	NE
SP5448_RS03980		-0.6051	0.5512		-0.4519	0.6535		0.6735	0.5325		773514	774245	+	WP_012560779.1		M5005_Spy_1092	rsuA		ribosomal small subunit pseudouridine synthase A	NE
SP5448_RS03985		0	1		0	1		0	1		774294	775100	-	WP_015055962.1		M5005_Spy_1091			transposase	NE
SP5448_RS03990		0	1		0	1		0	1		775121	775636	-	WP_011285371.1		M5005_Spy_1090			transposase	NE
SP5448_RS03995		-0.6508	0.5838		-1.204	0.3041		0.4027	0.732		776063	777376	+	WP_020750251.1		M5005_Spy_1088	obg		GTP-binding protein OBG family	E
SP5448_RS04000		-0.1539	0.8919		0.1677	0.8836		0.2915	0.7895		777445	777603	+	WP_002984154.1		M5005_Spy_1087			hypothetical cytosolic protein	NC
SP5448_RS04005		-0.4057	0.6929		-0.7356	0.4668		-0.03442	0.9741		777608	778303	-	WP_011285592.1		M5005_Spy_1086			nicotinamide mononucleotide transporter	NE
SP5448_RS04010		0.3318	0.7443		0.2034	0.8392		2.249	0.03273		778528	779928	+	WP_010922397.1		M5005_Spy_1085	bglA.2		beta-glucosidase	NE
SP5448_RS04015		0.3487	0.7257		-0.0618	0.9499		-1.934	0.06611		779937	781031	+	WP_010922396.1		M5005_Spy_1084			outer surface protein	NE
SP5448_RS04020		-0.6356	0.5034		-0.3131	0.7392		0.09418	0.925		781137	783131	+	WP_010922395.1		M5005_Spy_1083			PTS system, Cellobiose-specific IIA component	NC
SP5448_RS04025		-0.241	0.7661		0.5316	0.5117		-0.8597	0.3457		783154	783465	+	WP_010922394.1		M5005_Spy_1082			PTS system, Cellobiose-specific IIB component	NE
SP5448_RS04030		1.276	0.313		0.1696	0.8915		-1.338	0.2806		783468	783803	+	WP_002992853.1		M5005_Spy_1081			PTS system, Cellobiose-specific IIA component	NE
SP5448_RS04035		-0.1089	0.9132		-0.2604	0.7917		1.324	0.2026		783800	784249	+	WP_002992851.1		M5005_Spy_1080			hypothetical protein	NE
SP5448_RS04040		-0.1456	0.8744		0.03411	0.9702		-0.2824	0.7723		784427	785806	+	WP_047343327.1		M5005_Spy_1079			PTS system, Cellobiose-specific IIC component	NE
SP5448_RS04045		0.5079	0.6931		-0.3967	0.7551		-0.3705	0.7583		786103	786843	-	WP_002984187.1		M5005_Spy_1077	glnQ.2		Putative Bicarbonate transporter	NC
SP5448_RS04050		0.2084	0.8544		0.03095	0.9785		0.2741	0.8019		786843	789017	-	WP_011285590.1		M5005_Spy_1076	glnH		Putative Bicarbonate transporter	E
SP5448_RS04055		-0.06508	0.9315		0.09774	0.8977		-0.334	0.6878		789210	791201	+	WP_002984194.1		M5005_Spy_1075	uvrB		excinuclease ABC subunit B	NE
SP5448_RS04060		-0.294	0.8144		-0.6986	0.5749		0.03621	0.9755		791465	791608	+	WP_002984200.1		M5005_Spy_1074			hypothetical protein	NC
SP5448_RS04065		-0.4008	0.6689		-4.431	6.623e-06		-2.207	0.03268		791620	793158	+	WP_002989572.1		M5005_Spy_1073	dltA		D-alanine-activating enzyme	NE
SP5448_RS04070		-2.152	0.04906		-3.688	0.0007393		-3.07	0.007248		793155	794411	+	WP_010922392.1		M5005_Spy_1072	dltB		protein DltB	NE
SP5448_RS04075		0.1866	0.871		-0.2154	0.8525		-0.05337	0.9613		794429	794668	+	WP_002984216.1		M5005_Spy_1071	dltC		D-alanyl carrier protein	NE
SP5448_RS04080		-1.179	0.235		-3.446	0.0004701		-1.351	0.1944		794661	795911	+	WP_002984219.1		M5005_Spy_1070	dltD		protein precursor	NE
SP5448_RS04085		-0.01781	0.9818		-0.2931	0.7082		0.9856	0.2495		795942	796925	+	WP_002989577.1		M5005_Spy_1069			esterase	NE
SP5448_RS04090		0.5549	0.6581		-0.3272	0.7909		-1.223	0.3218		796990	797214	-	WP_002989580.1		M5005_Spy_1068			transposase	NE
SP5448_RS04095		0.9668	0.2728		1.588	0.07009		0.7299	0.4371		797540	798799	+	WP_010922390.1		M5005_Spy_1067	malX		ABC Cyclomaltodextrin -binding protein	NE
SP5448_RS04100		-0.1467	0.8518		-2.22	0.004808		-1.88	0.02918		798965	800668	+	WP_010922389.1		M5005_Spy_1066	amyB		neopullulanase/cyclomaltodextrinase/maltogenic alpha-amylase	NE
SP5448_RS04105		0.2151	0.7014		0.5597	0.3255		0.9162	0.1475		800694	802829	+	WP_010922388.1		M5005_Spy_1065	amyA		alpha-amylase	NE
SP5448_RS04110		-0.9913	0.3591		-0.9283	0.3853		0.6007	0.587		802904	804211	+	WP_010922387.1		M5005_Spy_1064	malC		ABC Cyclomaltodextrin permease protein	NE
SP5448_RS04115		-0.7234	0.5153		-0.5113	0.6416		-1.457	0.203		804208	805068	+	WP_010922386.1		M5005_Spy_1063	malD		ABC Cyclomaltodextrin permease protein	NE
SP5448_RS04120		-0.9951	0.3213		-1.333	0.1828		-0.696	0.5185		805090	805905	+	WP_010922385.1		M5005_Spy_1062	malA		maltodextrose utilization protein	NE
SP5448_RS04125		-1.146	0.236		-0.2548	0.7905		-0.2413	0.8185		806021	806818	-	WP_027968815.1		M5005_Spy_1061			transcriptional regulator, LacI family	NE
SP5448_RS04130		-0.6971	0.4746		-1.327	0.1702		1.287	0.2101		806976	807812	-	WP_002984240.1		M5005_Spy_1060	malG		ABC Maltodextrin permease protein	NE
SP5448_RS04135		0.1577	0.8261		0.501	0.488		0.8343	0.2985		807812	809173	-	WP_010922383.1		M5005_Spy_1059	malF		ABC Maltodextrin permease protein	NE
SP5448_RS04140		0.03544	0.9643		0.02174	0.9781		1.479	0.08819		809447	810694	-	WP_010922382.1		M5005_Spy_1058	malE		ABC Maltodextrin-binding protein	NE
SP5448_RS04145		-1.191	0.3441		-1.32	0.2918		-1.149	0.332		810940	811959	+	WP_002992583.1		M5005_Spy_1057	malR		transcriptional regulator, LacI family	NE
SP5448_RS04150		-0.216	0.8643		-0.6215	0.6138		0.5235	0.6676		812074	813567	+	WP_002992582.1		M5005_Spy_1056	malM		4-alpha-glucanotransferase	NE
SP5448_RS04155		-0.07279	0.9459		0.4032	0.7022		0.2223	0.8397		813602	815866	+	WP_010922381.1		M5005_Spy_1055	glgP		glycogen phosphorylase	NE
SP5448_RS04160		-0.9844	0.3698		-2.011	0.06507		0.7786	0.4849		816123	816743	-	WP_002989605.1		M5005_Spy_1054			hypothetical protein	NE
SP5448_RS04165		-0.2303	0.7394		-0.1983	0.7761		1.566	0.04156		817106	818194	-	WP_011054595.1		M5005_Spy_1052	int.1		phi5005.1 integrase	NE
SP5448_RS04170		-0.05035	0.9607		0.0118	0.9907		0.2807	0.7906		818315	819208	-	WP_011285585.1		M5005_Spy_1051			phage protein	NE
SP5448_RS04175		-0.6458	0.6146		-0.4595	0.7178		-0.8644	0.4721		819244	820068	-	WP_011285584.1		M5005_Spy_1050			phage transcriptional repressor	C
SP5448_RS04180		0.4399	0.6808		-0.7035	0.5091		-2.154	0.06243		820613	821212	-	WP_011284882.1		M5005_Spy_1048			phage protein	NE
SP5448_RS04185		0.4437	0.544		1.379	0.06086		-1.688	0.05599		821266	821475	+	WP_011284881.1		M5005_Spy_1047			phage protein	NE
SP5448_RS04190		-0.3127	0.6973		-0.7916	0.325		0.805	0.3582		821464	821850	-	WP_011054589.1		M5005_Spy_1046			phage protein	NE
SP5448_RS04195		-0.5697	0.6575		0.9272	0.4588		-1.912	0.125		821924	822124	+	WP_002992770.1		M5005_Spy_1045			transcriptional regulator	NC
SP5448_RS04200		-0.1989	0.8615		-0.2194	0.8489		0.004857	0.9965		822234	822443	-	WP_011017885.1
SP5448_RS04205		-0.6973	0.5268		-0.1043	0.923		0.8147	0.4653		822574	823077	-	WP_031499363.1		M5005_Spy_1044			phage protein	NE
SP5448_RS04210		-0.3944	0.4773		0.415	0.4614		0.1166	0.8519		823249	824079	+	WP_009881060.1		M5005_Spy_1043			phage protein	NE
SP5448_RS04215		0.3984	0.7629		-0.2511	0.8462		0.1902	0.8788		824066	824848	+	WP_011285581.1		M5005_Spy_1042			phage replication protein	NC
SP5448_RS04220		-0.02411	0.9838		-0.3947	0.736		-1.677	0.166		824989	825342	+	WP_011285579.1		M5005_Spy_1040			phage protein	NE
SP5448_RS04225		1.446	0.1428		-1.749	0.08173		-0.6679	0.5318		825323	825577	+	WP_011285578.1		M5005_Spy_1039			phage protein	NE
SP5448_RS04230		0.1731	0.8579		0.3869	0.6854		-0.9168	0.3652		825599	826081	+	WP_011285577.1		M5005_Spy_1038			phage protein	NE
SP5448_RS04235		-0.289	0.8159		1.246	0.3022		-0.953	0.4367		826082	826756	+	WP_011285576.1		M5005_Spy_1037	ssb1		phage single-strand DNA binding protein	NE
SP5448_RS04240		-0.3781	0.7691		0.9424	0.4608		-0.25	0.836		826749	827174	+	WP_011285575.1		M5005_Spy_1036	ssb2		phage single-strand DNA binding protein	NE
SP5448_RS04245		-0.1795	0.8916		-0.5759	0.6568		-0.8847	0.4729		827180	827383	+	WP_011106686.1		M5005_Spy_1035			phage protein	NE
SP5448_RS04250		-0.1175	0.9154		-1.199	0.2766		0.5642	0.6175		827383	827823	+	WP_011285574.1		M5005_Spy_1034			phage protein	NE
SP5448_RS04255		-0.04236	0.9691		-0.9106	0.4013		-0.5077	0.6536		827820	828176	+	WP_011284873.1		M5005_Spy_1033			phage protein	NE
SP5448_RS04260		-0.6616	0.5766		0.1406	0.9037		0.1805	0.8778		828173	828418	+	WP_011285573.1		M5005_Spy_1032			phage protein	NE
SP5448_RS04265		-0.3263	0.7028		-0.38	0.6576		-0.95	0.3234		828418	828654	+	WP_002995955.1		M5005_Spy_1031			phage protein	NE
SP5448_RS04270		-0.7611	0.4777		0.1017	0.9232		-1.325	0.2497		828818	829102	+	WP_011018134.1		M5005_Spy_1029			phage protein	NE
SP5448_RS04275		-1.273	0.3355		0.8462	0.5127		-0.4977	0.6897		829104	829736	+	WP_011018133.1		M5005_Spy_1028			phage protein	NE
SP5448_RS04280		0.04048	0.9581		-0.2984	0.6989		0.1813	0.8288		829739	830263	+	WP_011285572.1		M5005_Spy_1027			phage protein	NE
SP5448_RS04285		0.1204	0.8719		0.2359	0.753		1.46	0.07527		830260	830526	+	WP_011018131.1		M5005_Spy_1026			phage protein	NE
SP5448_RS04290		0.7592	0.26		0.2325	0.733		0.4683	0.5514		830812	831246	+	WP_011054810.1		M5005_Spy_1025			phage encoded transcriptional regulator, ArpU family	NE
SP5448_RS04295		0.07586	0.9523		1.769	0.1531		-1.51	0.2235		831856	832236	+	WP_011285571.1		M5005_Spy_1024			phage protein	NE
SP5448_RS04300		0.5184	0.553		0.7833	0.3678		0.8942	0.3392		832226	833500	+	WP_009880266.1		M5005_Spy_1023			terminase large subunit	NE
SP5448_RS04305		1.038	0.2137		0.8205	0.3243		1.916	0.03273		833536	834825	+	WP_046923975.1		M5005_Spy_1022			portal protein	NE
SP5448_RS04310		0.3758	0.6713		0.7673	0.3836		0.3336	0.7241		834794	835702	+	WP_011285569.1		M5005_Spy_1021			phage protein	NE
SP5448_RS04315		0.4878	0.6473		0.4786	0.6475		2.845	0.009043		835709	835978	+	WP_011285568.1		M5005_Spy_1020			phage protein	NE
SP5448_RS04320		1.523	0.1071		-1.654	0.08435		0.2665	0.7944		836223	836792	+	WP_009880262.1		M5005_Spy_1019			phage scaffold protein	NE
SP5448_RS04325		-0.1873	0.8401		-0.1581	0.8638		-0.4268	0.6658		836811	837701	+	WP_009880261.1		M5005_Spy_1018			phage protein	NE
SP5448_RS04330		-0.07324	0.9379		-0.5488	0.5559		-0.2312	0.8156		837714	838007	+	WP_009880260.1		M5005_Spy_1017			phage protein	NE
SP5448_RS04335		-0.5331	0.6832		0.7552	0.5585		-0.4822	0.6935		838021	838365	+	WP_009880259.1		M5005_Spy_1016			phage protein	NE
SP5448_RS04340		-1.143	0.37		-1.379	0.2755		-1.207	0.3128		838362	838673	+	WP_011285567.1		M5005_Spy_1015			phage protein	NE
SP5448_RS04345		1.116	0.2855		-0.5074	0.6272		1.597	0.1416		838670	839065	+	WP_009880257.1		M5005_Spy_1014			antigen C	NE
SP5448_RS04350		1.31	0.2129		0.7809	0.4547		-0.967	0.3918		839067	839477	+	WP_009880256.1		M5005_Spy_1013			antigen B	NE
SP5448_RS04355		-0.6436	0.4665		-0.8135	0.3554		1.367	0.1502		839489	839995	+	WP_009880255.1		M5005_Spy_1012			antigen A	NE
SP5448_RS04360		0.9701	0.2114		1.493	0.05507		2.098	0.01456		840008	840325	+	WP_009880254.1		M5005_Spy_1011			phage protein	NE
SP5448_RS04365		0.231	0.8029		0.5978	0.5147		1.183	0.227		840298	840756	+	WP_009880253.1		M5005_Spy_1010			phage protein	NC
SP5448_RS04370		-0.002905	0.996		0.2178	0.7114		0.3854	0.5544		840749	842554	+	WP_011054802.1		M5005_Spy_1009			phage protein	NE
SP5448_RS04375		-0.8887	0.328		-0.1408	0.8759		0.1065	0.9119		842555	844039	+	WP_009880250.1		M5005_Spy_1008			hypothetical protein	NE
SP5448_RS04380		0.2318	0.7471		0.2988	0.6794		0.8822	0.2649		844040	847480	+	WP_011285566.1		M5005_Spy_1007			phage protein	NE
SP5448_RS04385		0.5523	0.4595		-0.1795	0.8108		0.5567	0.4963		847485	849347	+	WP_015055954.1		M5005_Spy_1006			phage structural protein	NE
SP5448_RS04390		-0.4104	0.7375		-0.8723	0.4689		-0.4651	0.7003		849358	849705	+	WP_011285564.1		M5005_Spy_1005			phage protein	NE
SP5448_RS04400		0.2268	0.8413		-0.5264	0.6386		-1.8	0.126		849855	850178	+	WP_015055952.1		M5005_Spy_1003			phage protein	NE
SP5448_RS04405		0.1177	0.9288		-0.3588	0.782		-0.7004	0.57		850178	850510	+	WP_011285562.1		M5005_Spy_1002			N-acetylmuramoyl-L-alanine amidase	NE
SP5448_RS04410		0.05002	0.9493		-0.9747	0.2158		1.368	0.1101		850512	851276	+	WP_011285561.1		M5005_Spy_1001			phage-associated cell wall hydrolase	NE
SP5448_RS04415		0.1253	0.8863		0.3786	0.6642		1.796	0.05549		851288	851890	+	WP_011054796.1		M5005_Spy_1000			phage protein	NE
SP5448_RS04420		0.8572	0.334		0.08064	0.9273		-0.2065	0.8289		851901	852674	+	WP_011054795.1		M5005_Spy_0999			phage protein	NE
SP5448_RS04425		-0.962	0.449		-1.369	0.2716		0.4117	0.7348		852684	852905	+	WP_009880241.1		M5005_Spy_0998			phage protein	NE
SP5448_RS04430		0.2613	0.8031		-0.7955	0.4432		1.406	0.1933		852905	853564	+	WP_009880240.1		M5005_Spy_0997			phage protein	NE
SP5448_RS04435		0.2171	0.8198		-0.03696	0.9687		0.6371	0.5247		853686	854441	-	WP_011285560.1		M5005_Spy_0996	speA2		enterotoxin	NE
SP5448_RS04440		-0.1954	0.8825		0.4649	0.7183		0.9235	0.4593		854661	854849	+	WP_011285559.1		M5005_Spy_0995			phage protein; p7int phage integration site 5' to this gene	NE
SP5448_RS04445		0.3646	0.7476		0	1		0	1		855440	856054	+	WP_011285558.1		M5005_Spy_0994			putative membrane-associated alkaline phosphatase	C
SP5448_RS04450		0.3319	0.7784		1.676	0.1446		0.2509	0.8303		856181	856966	-	WP_010922378.1		M5005_Spy_0993			ABC transporter permease protein	NE
SP5448_RS04455		1.021	0.3523		-0.5514	0.6137		-2.495	0.03385		856976	857674	-	WP_002984437.1		M5005_Spy_0992			ABC transporter ATP-binding protein	NE
SP5448_RS04460		-0.06182	0.957		-0.2633	0.8198		-0.07461	0.9459		857674	858045	-	WP_010922377.1		M5005_Spy_0991			transcriptional regulator, GntR family	NC
SP5448_RS04465		0	1		0	1		1.435	0.1896		858230	861340	+	WP_010922376.1		M5005_Spy_0990	dnaE		DNA polymerase III alpha subunit	E
SP5448_RS04470		-0.1731	0.8784		0.007186	0.995		0.2687	0.8056		861420	862433	+	WP_010922375.1		M5005_Spy_0989	pfk		non-allosteric 6-phosphofructokinase	E
SP5448_RS04475		-0.07188	0.9518		-0.1764	0.8825		0.7542	0.506		862496	863998	+	WP_002984447.1		M5005_Spy_0988	pyk		pyruvate kinase	E
SP5448_RS04480		0.1174	0.9		-2.359	0.01322		-0.8638	0.3986		864216	864773	+	WP_002984449.1		M5005_Spy_0987	sipC		signal peptidase I	NE
SP5448_RS04485		0.6751	0.5547		0.3768	0.7386		0.713	0.5403		864949	866763	+	WP_011285557.1		M5005_Spy_0986	glmS		glucosamine--fructose-6-phosphate aminotransferase (isomerizing)	E
SP5448_RS04490		0.7666	0.4982		1.071	0.3344		-2.41	0.04511		866959	867294	+	WP_002989626.1		M5005_Spy_0985			phnA protein	NE
SP5448_RS04495		-0.4311	0.7081		0.4898	0.6643		-2.227	0.06082		867400	868041	+	WP_002992417.1		M5005_Spy_0984			histidine transport system permease protein	NE
SP5448_RS04500		-0.6334	0.6015		-0.3125	0.7928		-1.024	0.3958		868051	868680	+	WP_002984457.1		M5005_Spy_0983			histidine transport ATP-binding protein	NC
SP5448_RS04505		0.5488	0.4557		-1.42	0.05478		-0.7157	0.3778		868696	869532	+	WP_010922372.1		M5005_Spy_0982			histidine-binding protein	NE
SP5448_RS04510		-0.4391	0.6123		0.1265	0.8833		-0.5847	0.53		869902	870675	+	WP_011285556.1		M5005_Spy_0981	cfa		cAMP factor	NE
SP5448_RS04515		-0.4971	0.5194		-0.2278	0.7683		1.004	0.2332		871044	872279	-	WP_010922370.1		M5005_Spy_0980			cobalt-zinc-cadmium resistance protein	NE
SP5448_RS04520		-0.3933	0.7009		0.6015	0.5493		-1.932	0.09221		872399	873721	-	WP_011285555.1		M5005_Spy_0979			hypothetical protein	C
SP5448_RS04525		-0.58	0.6154		0.2562	0.8205		0.005639	0.9961		874250	876568	+	WP_002989648.1		M5005_Spy_0977	pcrA		DNA helicase II	C
SP5448_RS04530		-0.1479	0.8979		-0.4981	0.6681		-0.3732	0.735		876932	877180	+	WP_015055951.1		M5005_Spy_0976			integral membrane protein	NE
SP5448_RS04535		-0.5961	0.5545		-0.4512	0.6516		1.563	0.1375		877241	877828	+	WP_011285553.1		M5005_Spy_0975			hypothetical protein	NE
SP5448_RS04540		0.7382	0.5666		-1.231	0.3325		-1.391	0.2634		877839	878027	+	WP_002984473.1		M5005_Spy_0974			small integral membrane protein	NC
SP5448_RS04545		0.006916	0.9951		1.175	0.2887		-1.644	0.1621		878040	878579	+	WP_002984475.1		M5005_Spy_0973			general stress protein, Gls24 family	NE
SP5448_RS04550		0.8011	0.4807		1.144	0.307		2.061	0.07101		878620	878820	+	WP_002984476.1		M5005_Spy_0972			hypothetical protein	NE
SP5448_RS04555		-0.4	0.7413		-1.244	0.297		0.6282	0.5955		878831	879319	+	WP_002994467.1		M5005_Spy_0971			general stress protein, Gls24 family	NE
SP5448_RS04560		0.2047	0.8481		-2.607	0.01441		-1.824	0.1007		879482	880123	+	WP_010922367.1		M5005_Spy_0970			NAD-dependent K+ or Na+ uptake system component	NE
SP5448_RS04565		0.1089	0.9014		-1.038	0.241		-1.977	0.05132		880266	880808	-	WP_002984482.1		M5005_Spy_0968			transcriptional regulator, TetR family	NE
SP5448_RS04570		0.02546	0.982		-0.3447	0.757		-0.8866	0.4499		880926	881627	+	WP_010922366.1		M5005_Spy_0967			ABC transporter ATP-binding protein	NE
SP5448_RS04575		-0.472	0.4831		-0.2837	0.6759		-1.018	0.1721		881642	884278	+	WP_015055950.1		M5005_Spy_0965			ABC transporter permease protein	NE
SP5448_RS04580		0.4117	0.6851		0.1368	0.8924		-1.553	0.1696		884370	884966	+	WP_010922364.1		M5005_Spy_0964			type I restriction-modification system specificity subunit	NE
SP5448_RS04585		0.6731	0.3986		1.064	0.1822		1.038	0.231		884977	885933	+	WP_002989673.1		M5005_Spy_0963			integral membrane protein	NE
SP5448_RS04590		-0.3287	0.7185		-0.8761	0.3335		0.7763	0.4226		886030	887370	+	WP_010922363.1		M5005_Spy_0962			hypothetical protein	NE
SP5448_RS04595		-0.2365	0.8105		-0.4893	0.6162		-1.144	0.2716		887486	888370	+	WP_002989678.1		M5005_Spy_0961	truB		tRNA pseudouridine synthase B	NE
SP5448_RS04600		0.4658	0.6812		0	1		0	1		888399	889331	+	WP_002989679.1		M5005_Spy_0960	mreA		riboflavin kinase/FMN adenylyltransferase	E
SP5448_RS04605		0.4245	0.6526		4.465	1.691e-06		3.943	6.931e-05		889374	889778	+	WP_010922362.1		M5005_Spy_0959	spxA1		suppressor of clpP & X SpxA homolog, allele 1	NE
SP5448_RS04610		0.1155	0.9191		-0.944	0.3979		1.071	0.3477		889780	890058	+	WP_002984497.1		M5005_Spy_0958			hypothetical cytosolic protein	NE
SP5448_RS04615		-1.152	0.3825		-1.212	0.3502		-1.433	0.2458		890048	890836	+	WP_010922361.1		M5005_Spy_0957			myo-inositol-1(or 4)-monophosphatase	NE
SP5448_RS04620		0	1		0	1		0	1		890839	892149	+	WP_010922360.1		M5005_Spy_0956			16S rRNA m(5)C 967 methyltransferase	E
SP5448_RS04625		0.5715	0.652		-2.491	0.04759		-2.493	0.04401		892288	893154	+	WP_002993896.1		M5005_Spy_0955	pstS		phosphate-binding protein	NE
SP5448_RS04630		-2.17	0.1009		-2.261	0.08124		-2.109	0.08958		893165	894100	+	WP_010922359.1		M5005_Spy_0954	pstC		phosphate transport system permease protein	NC
SP5448_RS04635		-1.901	0.09107		-0.8018	0.4678		-0.7127	0.5329		894090	894977	+	WP_010922358.1		M5005_Spy_0953	pstA		phosphate transport system permease protein	NE
SP5448_RS04640		-0.9409	0.397		-0.7862	0.4735		-0.6762	0.5508		894993	895796	+	WP_002984509.1		M5005_Spy_0952	pstB2		phosphate transport ATP-binding protein	NE
SP5448_RS04645		-1.077	0.2245		-1.438	0.1058		1.265	0.1918		895809	896567	+	WP_002993892.1		M5005_Spy_0951	pstB		phosphate transport ATP-binding protein	NE
SP5448_RS04650		0.3402	0.7641		0.522	0.6489		0	1		896635	897288	+	WP_002984514.1		M5005_Spy_0950	phoU		phosphate transport system protein	NC
SP5448_RS04655		-0.3719	0.7071		-0.2028	0.8355		1.112	0.2806		897493	900030	+	WP_010922356.1		M5005_Spy_0949	pepN		lysyl aminopeptidase/alanine aminopeptidase	NE
SP5448_RS04660		0.2401	0.8395		0.8801	0.4611		0.9047	0.4243		900376	901050	+	WP_010922355.1		M5005_Spy_0948	ciaR		TCS-8, Response regulator ciaR	NE
SP5448_RS04665		0.6963	0.5609		-1.647	0.1657		-2.334	0.0542		901043	902353	+	WP_047343328.1		M5005_Spy_0947	ciaH		TCS-8, Sensor protein ciaH (PDC domain)	NE
SP5448_RS04670		-0.9214	0.424		-0.9044	0.4367		-0.7789	0.4803		902478	902711	-	WP_002989695.1		M5005_Spy_0946	rpsT		SSU ribosomal protein S20P	NE
SP5448_RS04675		-0.34	0.7642		-0.16	0.8889		0.09716	0.9291		902780	903700	-	WP_010922353.1		M5005_Spy_0945	coaA		pantothenate kinase	E
SP5448_RS04680		-0.3028	0.7125		-0.5905	0.472		1.524	0.0866		903968	904555	+	WP_011285548.1		M5005_Spy_0944			16S rRNA m(2)G 1207 methyltransferase	NE
SP5448_RS04685		-0.9929	0.2897		-1.427	0.125		0.9381	0.3446		905214	905603	+	WP_011285547.1		M5005_Spy_0943	cdd		cytidine deaminase	NE
SP5448_RS04690		0.1567	0.8838		-1.066	0.3151		2.745	0.0122		905697	906749	+	WP_002989701.1		M5005_Spy_0942			nucleoside-binding protein	NE
SP5448_RS04695		1.692	0.01934		1.288	0.07668		0.5673	0.4795		906888	908420	+	WP_010922350.1		M5005_Spy_0941			nucleoside transport ATP-binding protein	NE
SP5448_RS04700		1.127	0.1143		-0.2753	0.7042		2.606	0.001819		908413	909477	+	WP_002984537.1		M5005_Spy_0940			nucleoside transport system permease protein	NE
SP5448_RS04705		1.613	0.06215		0.1779	0.8375		0.1185	0.9016		909479	910435	+	WP_010922349.1		M5005_Spy_0939			nucleoside transport system permease protein	NE
SP5448_RS04710		-0.34	0.7642		-0.16	0.8889		0.09716	0.9291		910648	912366	-	WP_010922348.1		M5005_Spy_0938	pgmA		phosphoglucomutase/phosphomannomutase	E
SP5448_RS04715		-1.893	0.1433		-1.955	0.1267		-1.785	0.1409		912542	913111	-	WP_002984543.1		M5005_Spy_0937			transporter	NE
SP5448_RS04720		-0.2022	0.8725		0.8887	0.4792		0.221	0.8522		913169	913714	-	WP_010922347.1		M5005_Spy_0936	dfp		phosphopantothenoylcysteine decarboxylase	E
SP5448_RS04725		0	1		0	1		0	1		913707	914399	-	WP_002984545.1		M5005_Spy_0935	dpfB		phosphopantothenate--cysteine ligase	C
SP5448_RS04730		-0.8409	0.3088		-0.3294	0.6899		-1.323	0.1447		914595	915431	+	WP_002992892.1		M5005_Spy_0934			lipoate-protein ligase A	NE
SP5448_RS04735		-0.1892	0.8441		-0.3602	0.7048		0.991	0.3253		915428	916627	+	WP_002992890.1		M5005_Spy_0933			probable NADH-dependent flavin oxidoreductase	NE
SP5448_RS04740		-0.3431	0.5837		-0.7634	0.2285		1.01	0.1663		916624	917622	+	WP_010922345.1		M5005_Spy_0932			luciferase-like monooxygenase	NE
SP5448_RS04745		0.514	0.6243		0.2546	0.8059		2.396	0.0266		917664	917996	+	WP_002984553.1		M5005_Spy_0931			glycine cleavage system H protein	NE
SP5448_RS04750		0.1125	0.9228		0.8691	0.443		0.7496	0.5174		917989	918801	+	WP_010922344.1		M5005_Spy_0930			ATPase associated with chromosome architecture/replication	NE
SP5448_RS04755		0.1551	0.8552		0.6235	0.4608		1.353	0.1427		918794	919675	+	WP_010922343.1		M5005_Spy_0929			SIR2 family protein	NE
SP5448_RS04760		1.053	0.247		0.5354	0.5535		0.6605	0.4954		919722	920741	+	WP_010922342.1		M5005_Spy_0928	lplA		lipoate-protein ligase A	NE
SP5448_RS04765		0	1		0	1		0	1		920869	922539	+	WP_002989724.1		M5005_Spy_0927	fhs.1		formate--tetrahydrofolate ligase	E
SP5448_RS04770		-0.3166	0.8095		0.7977	0.5378		-0.4783	0.6973		922624	924201	+	WP_047343329.1		M5005_Spy_0926			cardiolipin synthetase	NC
SP5448_RS04775		-0.6926	0.5766		0.07285	0.9522		2.278	0.05704		924541	924879	+	WP_002989726.1		M5005_Spy_0925	rnhB		anaerobic ribonucleoside-triphosphate reductase	NE
SP5448_RS04780		0.5226	0.589		0.6831	0.4751		0.6186	0.5423		925277	926545	-	WP_010922340.1		M5005_Spy_0924	pdxR		Pyrodoxal 5' phophate (PLP) biosynthesis; GntR-like regulator	NE
SP5448_RS04785		0.4745	0.6527		-0.8319	0.4249		1.059	0.3292		926635	927501	+	WP_010922339.1		M5005_Spy_0923	pdxS		Pyrodoxal 5' phophate (PLP) biosynthesis	NE
SP5448_RS04790		0.2973	0.7444		-0.2323	0.7976		1.77	0.06797		927479	928036	+	WP_002989733.1		M5005_Spy_0922	pdxT		Pyrodoxal 5' phophate (PLP) biosynthesis	NE
SP5448_RS04795		0.2557	0.7675		-0.01594	0.9853		-0.782	0.4034		928170	929714	+	WP_011017795.1		M5005_Spy_0921			ABC transporter ATP-binding protein	NE
SP5448_RS04800		0.2782	0.7831		-0.1164	0.9075		1.269	0.2294		930079	931302	+	WP_010922337.1		M5005_Spy_0920			UDP-N-acetylmuramoylpentapeptide-lysine N(6)-alanyltransferase	NE
SP5448_RS04805		0	1		0	1		0	1		931344	932906	-	WP_009880616.1		M5005_Spy_0919	guaA		GMP synthase (glutamine-hydrolyzing)	C
SP5448_RS04810		1.135	0.1406		0.7819	0.3112		0.3383	0.6892		933073	934506	+	WP_010922336.1		M5005_Spy_0918			hypothetical protein	NE
SP5448_RS04815		-0.6214	0.5992		-0.9397	0.42		-2.251	0.06237		934589	935287	+	WP_002989743.1		M5005_Spy_0917			transcriptional regulator, GntR family	C
SP5448_RS04820		0.312	0.7853		-0.1056	0.9272		0.07751	0.9437		935376	935717	+	WP_002984591.1		M5005_Spy_0916	ylxM		signal recognition particle associated protein	C
SP5448_RS04825		0.05197	0.962		0.2599	0.8092		0.1174	0.9164		935732	937294	+	WP_011285545.1		M5005_Spy_0915	ffh		signal recognition particle, subunit FFH/SRP54	E
SP5448_RS04830		-0.4024	0.496		-0.1967	0.7426		0.4199	0.5261		937411	938109	-	WP_002993300.1		M5005_Spy_0914			phage transcriptional repressor	NE
SP5448_RS04835		-1.138	0.3227		-0.9649	0.4064		-0.8244	0.4549		938578	939648	+	WP_002984598.1		M5005_Spy_0913	xerD		recombinase	C
SP5448_RS04840		1.252	0.2732		1.306	0.2466		-1.799	0.1304		940348	940830	+	WP_010922334.1		M5005_Spy_0911			hypothetical protein	NE
SP5448_RS04845		0.6914	0.4339		0.5037	0.5691		-1.653	0.1102		940919	941971	+	WP_011017789.1		M5005_Spy_0910	citC		(citrate [pro-3S]-lyase)-ligase	NE
SP5448_RS04850		-0.08255	0.9381		-0.1226	0.9069		1.202	0.2707		942081	943475	-	WP_011285541.1		M5005_Spy_0909	oadA1		oxaloacetate decarboxylase alpha chain	NE
SP5448_RS04855		-0.004347	0.9949		-0.2921	0.6721		0.1056	0.8903		943490	944068	-	WP_010922331.1		M5005_Spy_0908	citX		apo-citrate lyase phosphoribosyl-dephospho-CoA transferase	NE
SP5448_RS04860		0.7473	0.445		-0.275	0.7765		0.5158	0.6152		944061	945593	-	WP_010922330.1		M5005_Spy_0907	citF		citrate lyase alpha chain/citrate CoA-transferase	NC
SP5448_RS04865		-0.1095	0.9327		-0.4493	0.7259		-0.8554	0.4808		945596	946483	-	WP_010922329.1		M5005_Spy_0906	citE		citrate lyase beta chain/citryl-CoA lyase subunit	NE
SP5448_RS04870		-0.8751	0.3818		-1.724	0.08134		-1.813	0.08315		946471	946779	-	WP_010922328.1		M5005_Spy_0905	citD		citrate lyase acyl carrier protein	NE
SP5448_RS04880		0.8586	0.3842		0.483	0.62		1.039	0.3125		946967	948088	-	WP_002991766.1		M5005_Spy_0903	oadB		oxaloacetate decarboxylase beta chain	NE
SP5448_RS04885		0.1166	0.9105		-0.5046	0.6249		-1.027	0.3533		948133	948528	-	WP_002991764.1		M5005_Spy_0902			biotin carboxyl carrier protein of oxaloacetate decarboxylase	NE
SP5448_RS04890		0.8524	0.443		1.393	0.2039		-0.4886	0.6696		948585	948908	-	WP_011285538.1		M5005_Spy_0901			hypothetical protein	NE
SP5448_RS04895		0.1174	0.9143		0.9656	0.3666		-0.8624	0.4388		949288	950691	+	WP_014635470.1		M5005_Spy_0900			Mg2+/citrate complex secondary transporter	NE
SP5448_RS04900		0.1998	0.8729		0.9532	0.4328		1.927	0.112		950849	951544	+	WP_002995032.1		M5005_Spy_0899	citG		transcriptional regulator, GntR family	NE
SP5448_RS04905		-0.1476	0.8582		-0.5341	0.5172		-1.692	0.0577		951537	952421	+	WP_010922323.1		M5005_Spy_0898			2-(5''-triphosphoribosyl)-3'-dephosphocoenzyme-A synthase	NE
SP5448_RS04910		-0.07324	0.9372		-0.2979	0.7474		-0.8513	0.3947		952621	953751	-	WP_010922322.1		M5005_Spy_0897			oxaloacetate decarboxylase beta chain	NE
SP5448_RS04915		-0.3358	0.7779		-0.1542	0.8975		-0.4008	0.7233		953761	954111	-	WP_010922321.1		M5005_Spy_0896			biotin carboxyl carrier protein of oxaloacetate decarboxylase	NE
SP5448_RS04920		0.08085	0.9465		0.6886	0.5581		0.218	0.8546		954111	954425	-	WP_009881173.1		M5005_Spy_0895			hypothetical membrane associated protein	NE
SP5448_RS04925		0.8983	0.2675		0.2476	0.7608		-0.3836	0.6732		954468	955850	-	WP_015055948.1		M5005_Spy_0894	oadA2		oxaloacetate decarboxylase alpha chain	NE
SP5448_RS04930		-0.9115	0.4587		-0.5033	0.6745		-0.06146	0.9592		956027	957373	-	WP_010922319.1		M5005_Spy_0893	gid		glucose inhibited division protein A	NC
SP5448_RS04935		0.4342	0.6369		-0.04089	0.9642		0.5322	0.5842		957524	958240	-	WP_009880716.1		M5005_Spy_0892	satE		hypothetical protein	NE
SP5448_RS04940		0	1		0.4013	0.7258		0	1		958233	958898	-	WP_002989760.1		M5005_Spy_0891	satD		hypothetical protein	E
SP5448_RS04945		0.04961	0.947		0.4101	0.5846		-0.3713	0.656		959003	959995	-	WP_010922317.1		M5005_Spy_0890	ddh		D-lactate dehydrogenase	NE
SP5448_RS04955		0.2992	0.6935		1.109	0.1456		-0.06818	0.9362		960968	961450	+	WP_011285535.1		M5005_Spy_0886			transcriptional regulator, LysR family	NE
SP5448_RS04960		0.4766	0.6552		0.7442	0.4812		0.3731	0.7399		961525	963654	-	WP_010922315.1		M5005_Spy_0885			DNA topoisomerase I	C
SP5448_RS04965		0.3036	0.6862		0.2694	0.721		-2.965	0.0004554		963761	964597	-	WP_010922314.1		M5005_Spy_0884	smf		hypothetical protein	NE
SP5448_RS04970		-0.1128	0.8781		0.3308	0.6542		0.09446	0.9069		964662	965453	-	WP_011285534.1		M5005_Spy_0883			ribonuclease HII	NE
SP5448_RS04975		0	1		0	1		0	1		965443	966291	-	WP_010922312.1		M5005_Spy_0882			GTP-binding protein	E
SP5448_RS04980		0.4968	0.4289		0.4783	0.4512		0.8081	0.249		966510	966950	+	WP_002989774.1		M5005_Spy_0881			hypothetical cytosolic protein	NE
SP5448_RS04985		-1.105	0.3382		-0.7407	0.5247		-0.8272	0.4538		966947	967597	+	WP_002984629.1		M5005_Spy_0880			conserved membrane protein	C
SP5448_RS04990		-0.02931	0.9662		0.532	0.4449		0.8833	0.2468		967714	968625	+	WP_010922311.1		M5005_Spy_0879			hypothetical protein	NE
SP5448_RS04995		0.1343	0.9098		1.032	0.3721		1.667	0.1556		968675	969043	-	WP_010922310.1		M5005_Spy_0878			hypothetical protein	NE
SP5448_RS05000		0.1575	0.8875		-0.688	0.5276		-2.457	0.02919		969657	970070	-	WP_010922309.1		M5005_Spy_0876			lactoylglutathione lyase	NE
SP5448_RS05005		0.2801	0.7843		-0.303	0.7639		-0.2244	0.8326		970153	970902	-	WP_002984641.1		M5005_Spy_0875	srtA		sortase A; primary sortase	E
SP5448_RS05010		0.4103	0.702		-1.771	0.1009		-2.938	0.01205		970922	973408	-	WP_010922308.1		M5005_Spy_0874	gyrA		DNA gyrase subunit A	E
SP5448_RS05015		0.3513	0.7283		-4.939	1.067e-05		-3.187	0.003949		973599	974582	+	WP_002984645.1		M5005_Spy_0873	ldh		L-lactate dehydrogenase	NE
SP5448_RS05020		-0.04736	0.956		-1.424	0.09613		2.003	0.03034		974741	976111	-	WP_002989788.1		M5005_Spy_0872	nox		NADH oxidase H2O-forming	NE
SP5448_RS05025		0.5137	0.6051		-0.08017	0.9354		-0.4573	0.6656		976352	978079	-	WP_011285531.1		M5005_Spy_0871			multidrug resistance ABC transporter ATP-binding and permease protein	NE
SP5448_RS05030		-0.5204	0.624		-0.4961	0.635		-0.412	0.706		978076	979800	-	WP_010922306.1		M5005_Spy_0870			multidrug resistance ABC transporter ATP-binding and permease protein	NE
SP5448_RS05035		0.9974	0.241		0.4263	0.6154		-0.2999	0.7447		979810	980409	-	WP_002994981.1		M5005_Spy_0869			antigen	NE
SP5448_RS05040		-0.4563	0.6352		-1.134	0.238		-1.486	0.1557		980410	981387	-	WP_010922305.1		M5005_Spy_0868			hypothetical protein	NE
SP5448_RS05045		-0.2784	0.7267		0.499	0.5313		1.839	0.03504		981394	982650	-	WP_010922304.1		M5005_Spy_0867	glyA		serine hydroxymethyltransferase	NE
SP5448_RS05050		-1.409	0.2673		-1.104	0.3737		-2.053	0.09674		982640	983092	-	WP_002984660.1		M5005_Spy_0866			phosphinothricin N-acetyltransferase	NE
SP5448_RS05055		-0.5005	0.6631		-0.3838	0.7408		0.615	0.5776		983110	983700	-	WP_002984663.1		M5005_Spy_0865			SUA5 protein	NC
SP5448_RS05060		-1.128	0.302		-3.89	0.0004059		-0.6154	0.5797		983684	984523	-	WP_010922303.1		M5005_Spy_0864	hemK		peptide release factor-glutamine N5-methyltransferase	NE
SP5448_RS05065		-0.3465	0.7613		-0.1905	0.8688		0.6034	0.5824		984523	985602	-	WP_002994969.1		M5005_Spy_0863	prfA		bacterial peptide chain release factor 1	E
SP5448_RS05070		-1.301	0.1985		-1.831	0.06944		-2.424	0.02714		985637	986206	-	WP_002994966.1		M5005_Spy_0862	tdk2		thymidine kinase	NE
SP5448_RS05075		-0.8132	0.5218		-0.8561	0.4912		-1.696	0.1703		986344	986529	+	WP_002984671.1		M5005_Spy_0861			4-oxalocrotonate tautomerase	NE
SP5448_RS05080		-0.7337	0.5232		-0.6548	0.5617		-0.1111	0.9231		986582	987520	+	WP_010922301.1		M5005_Spy_0860	apbE		thiamine biosynthesis lipoprotein	NE
SP5448_RS05085		-1.085	0.3822		-0.09169	0.9397		-0.3517	0.7709		987584	988867	-	WP_002984674.1		M5005_Spy_0859			xanthine permease	NE
SP5448_RS05090		-0.6447	0.5236		-0.2712	0.7872		-2.377	0.02937		988867	989448	-	WP_002984677.1		M5005_Spy_0858	xpt		xanthine phosphoribosyltransferase	NE
SP5448_RS05095		-1.225	0.2322		-1.258	0.2141		0.6421	0.5455		989753	990736	-	WP_010922299.1		M5005_Spy_0857	guaC		GMP reductase	NE
SP5448_RS05100		-0.5254	0.5709		0.5095	0.5796		0.8237	0.4017		991014	992540	-	WP_002989810.1		M5005_Spy_0856			glycine betaine transport system permease protein	NE
SP5448_RS05105		-0.5229	0.6149		-0.7993	0.4393		-2.442	0.03387		992533	993261	-	WP_010922297.1		M5005_Spy_0855	proV		glycine betaine transport ATP-binding protein	NE
SP5448_RS05110		-1.458	0.1227		-1.245	0.1849		0.06504	0.9496		993681	994370	+	WP_011285529.1		M5005_Spy_0854			Na+ driven multidrug efflux pump (PAS domain)	NE
SP5448_RS05120		-0.2683	0.7954		-2.802	0.006489		-0.3059	0.7756		995463	996458	-	WP_010922296.1		M5005_Spy_0851			phosphate acetyltransferase	NE
SP5448_RS05125		0.2928	0.8002		1.549	0.17		-1.015	0.3801		996462	997367	-	WP_011285524.1		M5005_Spy_0849			ribosomal large subunit pseudouridine synthase D	NE
SP5448_RS05130		0	1		0	1		0	1		997364	998200	-	WP_002993124.1		M5005_Spy_0848			ATP-NAD kinase	E
SP5448_RS05135		-0.2161	0.8327		1.436	0.1556		-0.9162	0.4029		998175	998846	-	WP_002984696.1		M5005_Spy_0847			GTP pyrophosphokinase	NE
SP5448_RS05140		-0.2436	0.828		-0.7277	0.5094		0.8181	0.4693		998934	999512	+	WP_002984698.1		M5005_Spy_0846			putative adenylate cyclase family	NE
SP5448_RS05145		-0.8674	0.3688		-2.951	0.002302		-0.8035	0.4349		999652	1000632	+	WP_010922293.1		M5005_Spy_0845			ribose-phosphate pyrophosphokinase	NE
SP5448_RS05150		0	1		0	1		0	1		1000629	1001756	+	WP_002989829.1		M5005_Spy_0844	nifS2		cysteine desulfhydrase	E
SP5448_RS05155		-0.06312	0.9619		1.529	0.2366		-1.775	0.1542		1001746	1002093	+	WP_002989831.1		M5005_Spy_0843			hypothetical cytosolic protein	NE
SP5448_RS05160		0.43	0.7446		-1.676	0.1959		-1.409	0.2577		1002345	1002989	+	WP_002984705.1		M5005_Spy_0842			redox-sensitive transcriptional regulator Rex	NE
SP5448_RS05165		-0.2166	0.8587		-1.3	0.2778		0.6492	0.5846		1002999	1003694	+	WP_002989835.1		M5005_Spy_0841			glutamine amidotransferase, class I	NE
SP5448_RS05170		0.4877	0.6381		-0.4204	0.6836		-1.639	0.1398		1003696	1004376	-	WP_002984709.1		M5005_Spy_0840	radC		DNA repair protein	NE
SP5448_RS05175		0.9375	0.3192		0.3675	0.6934		-0.0742	0.9404		1004425	1005552	-	WP_002994399.1		M5005_Spy_0839			hypothetical membrane spanning protein	NE
SP5448_RS05180		-0.6047	0.5781		-0.2336	0.8279		1.139	0.304		1005732	1006346	-	WP_010922292.1		M5005_Spy_0838			lipase/acylhydrolase family protein	NE
SP5448_RS05185		0.2254	0.76		-0.04644	0.95		-1.176	0.1454		1006509	1008041	-	WP_010922291.1		M5005_Spy_0837			chloride channel protein	NE
SP5448_RS05190		-0.4334	0.6792		-0.3409	0.7418		1.938	0.07247		1008219	1008950	-	WP_002984720.1		M5005_Spy_0835			class B acid phosphatase	NE
SP5448_RS05195		1.067	0.3096		1.504	0.1449		0.7123	0.5087		1009186	1010235	+	WP_010922290.1		M5005_Spy_0834			Zn-dependent alcohol dehydrogenases and related dehydrogenases	NE
SP5448_RS05200		0.765	0.3679		0.5685	0.5023		-0.2728	0.7666		1010318	1011484	-	WP_010922289.1		M5005_Spy_0833			NAD-dependent malic enzyme	NE
SP5448_RS05205		0.755	0.4979		-0.8808	0.4253		1.795	0.1105		1011515	1012846	-	WP_010922288.1		M5005_Spy_0832	malP		malate-sodium symport	NE
SP5448_RS05210		-0.1056	0.9102		0.2559	0.7829		-0.3974	0.6895		1013007	1014548	+	WP_010922287.1		M5005_Spy_0831	dpiB		TCS-7 sensor kinase; citB, dpiB (PDC, PAS domains)	NE
SP5448_RS05215		-0.01749	0.9792		0.1933	0.7751		-0.5518	0.4576		1014529	1015194	+	WP_010922286.1		M5005_Spy_0830	dpiA		TCS-7 response regulator; citA, dpiA	NE
SP5448_RS05220		-2.03	0.07717		-1.717	0.1277		-2.955	0.01309		1015249	1016322	-	WP_002984738.1		M5005_Spy_0829			spermidine/putrescine-binding protein	NE
SP5448_RS05225		-0.2728	0.8051		-0.4591	0.6728		-0.6354	0.5724		1016315	1017091	-	WP_011285520.1		M5005_Spy_0828	potC		spermidine/putrescine transport system permease protein	NE
SP5448_RS05230		-1.353	0.3005		-1.183	0.3591		-1.303	0.2865		1017088	1017882	-	WP_002984743.1		M5005_Spy_0827	potB		spermidine/putrescine transport system permease protein	NE
SP5448_RS05235		-0.8284	0.4692		-0.6358	0.5826		-0.4398	0.6893		1017866	1019020	-	WP_010922284.1		M5005_Spy_0826	potA		spermidine/putrescine transport system ATP-binding protein	NE
SP5448_RS05240		0.3088	0.7851		0	1		0	1		1019066	1019953	-	WP_010922283.1		M5005_Spy_0825	murB		UDP-N-acetylenolpyruvoylglucosamine reductase	E
SP5448_RS05245		-0.2955	0.8133		-0.5425	0.6633		-0.5154	0.6618		1020103	1020603	-	WP_002984757.1		M5005_Spy_0824	folK		2-amino-4-hydroxy-6-hydroxymethyldihydropteridine pyrophosphokinase	NC
SP5448_RS05250		-1.124	0.3285		-0.9539	0.4116		-0.8092	0.4632		1020600	1020959	-	WP_002989868.1		M5005_Spy_0823	folQ		dihydroneopterin aldolase	NE
SP5448_RS05255		0	1		0	1		0	1		1020966	1021766	-	WP_010922282.1		M5005_Spy_0822	folP		dihydropteroate synthase	C
SP5448_RS05260		-1.879	0.08444		-1.662	0.1213		0.5279	0.6334		1021775	1022341	-	WP_002989871.1		M5005_Spy_0821	folE		GTP cyclohydrolase I	NE
SP5448_RS05265		0	1		0	1		0	1		1022388	1023665	-	WP_047343330.1		M5005_Spy_0820	folC.1		folylpolyglutamate synthase/dihydrofolate synthase	E
SP5448_RS05270		0.4784	0.3979		0.4652	0.4179		1.266	0.04655		1023997	1024959	+	WP_010922279.1		M5005_Spy_0818			polysaccharide deacetylase	NE
SP5448_RS05275		0.026	0.978		0.5969	0.5229		2.331	0.01913		1025076	1026323	-	WP_032459862.1		M5005_Spy_0817	dacA1		D-alanyl-D-alanine carboxypeptidase	NE
SP5448_RS05280		0.1156	0.9025		-0.5447	0.5607		-1.385	0.1672		1026574	1026957	-	WP_011285518.1
SP5448_RS05285		0.03293	0.9748		-0.07601	0.9409		0.659	0.5389		1026988	1027209	-	WP_002984776.1
SP5448_RS05290		-0.4733	0.6237		-0.8596	0.371		-0.2628	0.7986		1027282	1027503	-	WP_011285517.1
SP5448_RS05295		-1.253	0.192		-1.436	0.1339		-0.7025	0.4989		1027525	1027656	-	WP_002984780.1
SP5448_RS05305		-0.7658	0.3415		-1.502	0.06211		-1.958	0.0245		1028147	1028365	-	WP_010922277.1		M5005_Spy_0811			transcriptional regulator, Cro/CI family	NE
SP5448_RS05310		-0.6084	0.4554		-0.46	0.5723		1.553	0.07883		1028557	1029279	-	WP_010922276.1		M5005_Spy_0810	srtG		lantibiotic transport permease protein	NE
SP5448_RS05315		-0.2856	0.7291		-0.6322	0.4444		-1.147	0.2136		1029282	1030031	-	WP_010922275.1		M5005_Spy_0809	srtE		lantibiotic transport permease protein	NE
SP5448_RS05320		-0.5768	0.4863		-0.899	0.277		0.5357	0.5483		1030037	1030726	-	WP_010922274.1		M5005_Spy_0808	srtF		lantibiotic transport ATP-binding protein	NE
SP5448_RS05325		-0.0504	0.9601		-0.9837	0.3232		1.55	0.139		1030808	1031425	-	WP_010922273.1		M5005_Spy_0807	srtT		ABC transporter (ATP binding)-lantibiotic associated	NE
SP5448_RS05330		-0.2074	0.8656		-0.5562	0.6442		-1.479	0.2244		1031540	1031680	-	WP_002984803.1		M5005_Spy_0806	srtA		lantibiotic precursor	NC
SP5448_RS05335		0.5055	0.4852		0.5832	0.4235		2.089	0.01009		1031828	1033174	-	WP_002984805.1		M5005_Spy_0805	srtK		TCS-6 sensor kinase; Streptin biosynthesis (PDC domain)	NE
SP5448_RS05340		-0.05749	0.943		-0.5024	0.5322		0.5284	0.5456		1033167	1033853	-	WP_002984807.1		M5005_Spy_0804	srtR		TCS-6 response regulator; Streptin biosynthesis	NE
SP5448_RS05345		-0.01297	0.9872		-0.2417	0.7658		-0.01622	0.9854		1034004	1034699	-	WP_002984809.1		M5005_Spy_0803	srtI		protein involved in lantibiotic production	NE
SP5448_RS05355		1.065	0.405		0.9077	0.4686		3.171	0.009451		1035489	1035821	-	WP_020750214.1		M5005_Spy_0800			DNA-cytosine methyltransferase	NE
SP5448_RS05365		0	1		0	1		0	1		1036885	1037250	-	WP_002984819.1		M5005_Spy_0796	rplL		LSU ribosomal protein L12P	NE
SP5448_RS05370		0.1001	0.9297		0.1585	0.8901		0.2756	0.8009		1037315	1037815	-	WP_010922269.1		M5005_Spy_0795	rplJ		LSU ribosomal protein L10P	NE
SP5448_RS05375		-0.6639	0.561		-0.3687	0.7496		-0.263	0.8108		1038148	1039524	+	WP_010922268.1		M5005_Spy_0794	thdF		tRNA (5-carboxymethylaminomethyl-2-thiouridylate) synthase	C
SP5448_RS05380		0.1578	0.8795		-0.2664	0.7966		0.07928	0.9418		1039592	1041001	-	WP_010922267.1		M5005_Spy_0793			Xaa-His dipeptidase	NE
SP5448_RS05385		-0.5325	0.668		-1.775	0.1466		-1.48	0.2255		1041126	1041728	-	WP_002989923.1		M5005_Spy_0792			NAD(P)H-dependent quinone reductase	NE
SP5448_RS05390		-0.1682	0.8587		-0.3464	0.7111		1.889	0.05732		1041913	1043709	-	WP_010922266.1		M5005_Spy_0791	uvrC		excinuclease ABC subunit C	NE
SP5448_RS05395		-0.1486	0.872		-0.1994	0.8276		0.5922	0.545		1043811	1045208	-	WP_010922265.1		M5005_Spy_0790	gabD		succinate-semialdehyde dehydrogenase	NE
SP5448_RS05400		-0.3855	0.7011		0.07455	0.94		1.347	0.196		1045303	1045992	-	WP_011285513.1		M5005_Spy_0789			hydrolase, HAD superfamily	NE
SP5448_RS05405		0.5305	0.5904		0.5631	0.566		1.202	0.2512		1046008	1046574	-	WP_010922263.1		M5005_Spy_0788			acetyltransferase	NE
SP5448_RS05415		-0.7311	0.3918		0.7588	0.3733		-1.677	0.08936		1047353	1048399	-	WP_015055942.1		M5005_Spy_0786			iron(III)-binding protein	NE
SP5448_RS05420		-0.2874	0.7441		0.5458	0.5338		1.52	0.1111		1048393	1049181	-	WP_010922260.1		M5005_Spy_0785	tcs5R		TCS-5 response regulator yesN; regulates ptsA-D	NE
SP5448_RS05425		-0.1259	0.9012		0.5399	0.5915		2.75	0.009293		1049185	1050834	-	WP_011285511.1		M5005_Spy_0784	tcs5S		TCS-5 sensor kinase yesM; regulates ptsA-D (PDC domain)	NE
SP5448_RS05430		-0.06433	0.9352		1.042	0.1884		0.7267	0.3973		1050970	1051797	-	WP_002989931.1		M5005_Spy_0783	ptsD		PTS system, Mannose/Fructose family IID component	NE
SP5448_RS05435		0.07797	0.9361		0.7552	0.432		1.938	0.05693		1051794	1052603	-	WP_002984844.1		M5005_Spy_0782	ptsC		PTS system, Mannose/Fructose family IIC component	NE
SP5448_RS05440		-0.5833	0.4736		-0.01055	0.9897		1.34	0.138		1052620	1053111	-	WP_002984845.1		M5005_Spy_0781	ptsB		PTS system, Mannose/Fructose family IIB component	NE
SP5448_RS05445		-0.1783	0.8773		-0.542	0.6342		2.989	0.009113		1053130	1053555	-	WP_002989935.1		M5005_Spy_0780	ptsA		PTS system, Mannose/Fructose family IIA component	NE
SP5448_RS05450		0.3394	0.6754		1.131	0.1626		1.852	0.03541		1053762	1054781	-	WP_010922256.1		M5005_Spy_0779			hypothetical membrane spanning protein	NE
SP5448_RS05455		0.3469	0.7609		-0.115	0.9186		1.824	0.1096		1054896	1055333	-	WP_010922255.1		M5005_Spy_0778	msrB		peptide methionine sulfoxide reductase	NE
SP5448_RS05460		-0.5629	0.5907		-1.621	0.1209		-0.8347	0.4462		1055519	1056400	-	WP_011285510.1		M5005_Spy_0777	scl2		collagen-like surface protein	NE
SP5448_RS05465		-0.0862	0.9172		-1.056	0.2044		-1.222	0.1854		1056658	1058490	-	WP_010922253.1		M5005_Spy_0776	lepA		GTP-binding protein	NE
SP5448_RS05470		-0.8337	0.4696		-0.8523	0.4637		-0.7311	0.5077		1058614	1058760	-	WP_011285509.1		M5005_Spy_0775			nucleoside diphosphate kinase	NC
SP5448_RS05475		-1.283	0.3177		-1.49	0.2359		-2.056	0.09738		1058824	1059003	-	WP_011285508.1		M5005_Spy_0774			nucleoside diphosphate kinase	NE
SP5448_RS05480		-0.1416	0.8933		-0.1445	0.8893		1.346	0.214		1059470	1060132	-	WP_010922252.1		M5005_Spy_0772	csn2		CRISPR1-associated protein Csn2	NE
SP5448_RS05485		0.8414	0.3729		2.312	0.01343		1.978	0.04689		1060122	1060463	-	WP_002989951.1		M5005_Spy_0771	cas2		CRISPR1-associated protein Cas2	NE
SP5448_RS05490		0.4516	0.6662		0.8166	0.4274		1.537	0.1531		1060460	1061329	-	WP_002989953.1		M5005_Spy_0770	cas1		CRISPR1-associated protein Cas1	NE
SP5448_RS05495		0.279	0.6812		-0.1442	0.8334		1.023	0.1865		1061329	1065435	-	WP_011285506.1		M5005_Spy_0769	cas9		CRISPR1-associated protein Cas9	NE
SP5448_RS05500		0.4507	0.6649		-1.866	0.07335		-1.523	0.1682		1065915	1066547	-	WP_010922250.1		M5005_Spy_0768			hypothetical membrane spanning protein	NE
SP5448_RS05505		0.5117	0.5661		-0.2466	0.7813		1.302	0.1731		1066547	1067311	-	WP_011285505.1		M5005_Spy_0767			4-nitrophenylphosphatase	NE
SP5448_RS05510		1.053	0.4006		-1.323	0.2872		-1.571	0.2036		1067311	1068063	-	WP_011285504.1		M5005_Spy_0766			acyl-acyl carrier protein thioesterase	C
SP5448_RS05515		-0.5854	0.382		-1.59	0.01898		-1.813	0.01554		1068073	1069203	-	WP_010922247.1		M5005_Spy_0765	hemN		coproporphyrinogen oxidase	NE
SP5448_RS05520		0.01783	0.9844		0.304	0.7371		-1.042	0.2932		1069266	1069907	-	WP_010922246.1		M5005_Spy_0764			hypothetical protein	NE
SP5448_RS05525		0.5455	0.6366		-0.04641	0.9681		0.5327	0.6294		1070041	1071396	-	WP_010922245.1		M5005_Spy_0763	femD, glmM		phosphoglucosamine mutase	E
SP5448_RS05530		-1.036	0.3603		-2.267	0.04435		-3.118	0.008698		1071450	1072406	-	WP_002984857.1		M5005_Spy_0762			hypothetical membrane associated protein	NE
SP5448_RS05535		0	1		0	1		0	1		1072403	1073254	-	WP_010922244.1		M5005_Spy_0761	spyDAC		membrane spanning protein; ci-di-AMP synthase SpyDAC	E
SP5448_RS05540		-1.767	0.1817		-2.054	0.1136		-1.91	0.1237		1073361	1074704	+	WP_011285501.1		M5005_Spy_0760			UDP-N-acetylmuramoylalanyl-D-glutamate--2,6-diaminopimelate ligase	E
SP5448_RS05545		-0.1299	0.8972		-1.487	0.1379		-1.582	0.1396		1074704	1075495	+	WP_010922242.1		M5005_Spy_0759			hypothetical membrane associated protein	E
SP5448_RS05550		0.01345	0.9902		-0.4719	0.6645		-1.916	0.1027		1075604	1076593	-	WP_002992006.1		M5005_Spy_0758	lplB		lipoate-protein ligase A	NE
SP5448_RS05555		-0.2083	0.7936		0.2006	0.8011		1.264	0.1433		1076826	1079243	+	WP_010922241.1		M5005_Spy_0757	hylA		hyaluronate lyase precursor	NE
SP5448_RS05560		-0.7346	0.4878		-1.397	0.1845		-0.6191	0.5752		1079917	1081680	-	WP_010922240.1		M5005_Spy_0755	acoL		dihydrolipoamide dehydrogenase	NE
SP5448_RS05565		0.2691	0.8167		-0.1297	0.9116		-0.1276	0.9083		1081713	1081952	+	WP_011285500.1		M5005_Spy_0754			hypothetical protein	NE
SP5448_RS05570		0.6989	0.5883		-0.7628	0.5467		0.8355	0.4962		1082007	1083416	-	WP_010922239.1		M5005_Spy_0753	acoC		dihydrolipoamide acetyltransferase component of pyruvate dehydrogenase complex	NE
SP5448_RS05575		0.7291	0.4583		0.7515	0.4413		-1.333	0.2124		1083601	1084599	-	WP_002989981.1		M5005_Spy_0752	acoB		pyruvate dehydrogenase E1 component beta subunit	NE
SP5448_RS05580		1.052	0.3836		-0.4621	0.6964		1.398	0.2381		1084658	1085626	-	WP_010922238.1		M5005_Spy_0751	acoA		pyruvate dehydrogenase E1 component alpha subunit	NE
SP5448_RS05585		0.6717	0.4982		-0.1237	0.8998		-0.8496	0.4166		1085911	1087818	-	WP_010922237.1		M5005_Spy_0750			ABC transporter ATP-binding protein	NE
SP5448_RS05590		-0.8773	0.4646		1.562	0.1795		-1.32	0.2743		1087864	1088190	-	WP_002989987.1		M5005_Spy_0749			hypothetical protein	NE
SP5448_RS05595		-0.8788	0.4594		-1.112	0.3403		1.855	0.1122		1088220	1089005	-	WP_002989989.1		M5005_Spy_0748	estA		acetyl esterase	NE
SP5448_RS05600		-0.2304	0.8408		-0.4075	0.7247		-0.2309	0.8337		1089138	1090799	-	WP_010922236.1		M5005_Spy_0747			Zn-dependent hydrolase	E
SP5448_RS05605		-1.499	0.1773		-3.643	0.001108		-3.967	0.0007681		1091003	1091761	-	WP_011285499.1		M5005_Spy_0746			ABC transporter ATP-binding protein	NE
SP5448_RS05610		-0.4421	0.6416		-4.729	1.886e-06		-4.968	8.552e-06		1091758	1092627	-	WP_002991975.1		M5005_Spy_0745			ABC transporter permease protein	NE
SP5448_RS05615											1092804	1092983	-	WP_011285498.1
SP5448_RS05620		-1.354	0.2148		-3.342	0.002293		-2.645	0.02127		1092973	1093971	-	WP_010922233.1		M5005_Spy_0743			ABC transporter substrate-binding protein	NE
SP5448_RS05625		-1.613	0.1362		-0.5828	0.5853		0.707	0.5218		1094325	1095977	+	WP_010922232.1		M5005_Spy_0740	fbp		fibronectin-binding protein	NE
SP5448_RS05630		-0.301	0.7341		-0.4026	0.648		2.275	0.01652		1096036	1097283	-	WP_010922231.1		M5005_Spy_0739			tetratricopeptide repeat family protein	NE
SP5448_RS05635		-0.5946	0.5387		-0.3821	0.6898		1.795	0.07745		1097273	1098454	-	WP_002990002.1		M5005_Spy_0738			hypothetical membrane spanning protein	NE
SP5448_RS05640		-0.3775	0.7287		-1.349	0.2136		0.7919	0.478		1098512	1098988	-	WP_010922230.1		M5005_Spy_0737			mutator mutT protein/7,8-dihydro-8-oxoguanine-triphosphatase	NE
SP5448_RS05645		-0.1437	0.9012		-0.2882	0.8048		1.855	0.09565		1099209	1100249	-	WP_011285494.1		M5005_Spy_0736	cpsFQ		dTDP-glucose 4,6-dehydratase	E
SP5448_RS05650		-0.1175	0.9252		-0.5645	0.6504		-0.4688	0.6908		1100493	1101086	-	WP_002990099.1		M5005_Spy_0735	cpsFP		dTDP-4-dehydrorhamnose 3,5-epimerase	NC
SP5448_RS05655		0	1		0	1		0	1		1101086	1101955	-	WP_010922195.1		M5005_Spy_0734	cpsFO		glucose-1-phosphate thymidylyltransferase	E
SP5448_RS05660		-0.482	0.5891		-0.2737	0.7591		1.404	0.1496		1102013	1103119	-	WP_011285493.1		M5005_Spy_0733			glycine/D-amino acid oxidases family	NE
SP5448_RS05665		0.8935	0.317		1.491	0.0932		1.267	0.1848		1103159	1103947	-	WP_002984887.1		M5005_Spy_0732			NIF3-related protein	NE
SP5448_RS05670		0.3334	0.7714		0.3033	0.7934		0.1644	0.8811		1103937	1104623	-	WP_002990104.1		M5005_Spy_0731			para-aminobenzoate synthase component I/anthranilate synthase component I	E
SP5448_RS05675		-0.1365	0.9094		-1.181	0.3172		2.816	0.0164		1104695	1105351	-	WP_010922193.1		M5005_Spy_0730	nth		endonuclease III	NE
SP5448_RS05680		0	1		0	1		0	1		1105348	1106031	-	WP_010922192.1		M5005_Spy_0729	dnaD		DNA replication protein	NC
SP5448_RS05685		-1.324	0.2283		-2.936	0.007173		-1.758	0.1171		1106112	1106630	-	WP_002990109.1		M5005_Spy_0728	apt		adenine phosphoribosyltransferase	NE
SP5448_RS05690		-0.1423	0.8868		0.05789	0.9535		-0.5742	0.5877		1106781	1108991	-	WP_002990110.1		M5005_Spy_0727	recJ		single-stranded-DNA-specific exonuclease	NE
SP5448_RS05695		1.046	0.3503		-0.8229	0.46		-1.908	0.104		1108988	1109752	-	WP_002984893.1		M5005_Spy_0726			short chain dehydrogenase	NE
SP5448_RS05700		0	1		0	1		1.353	0.2157		1109752	1110681	-	WP_002984894.1		M5005_Spy_0725	elaC		metal-dependent hydrolase	E
SP5448_RS05705		-1.076	0.3815		-2.492	0.0408		-1.902	0.1188		1110696	1111331	-	WP_002990114.1		M5005_Spy_0724			cystathionine beta-lyase/cystathionine gamma-lyase	NE
SP5448_RS05710		0.7733	0.2515		0.865	0.2033		1.107	0.1377		1111324	1112562	-	WP_010922191.1		M5005_Spy_0723	hflX		GTP-binding protein	NE
SP5448_RS05715		0.4951	0.6429		-0.8676	0.4141		-2.035	0.07325		1112635	1113534	-	WP_047343331.1		M5005_Spy_0722	miaA		tRNA delta(2)-isopentenylpyrophosphate transferase	NE
SP5448_RS05720		0.8358	0.3232		1.077	0.2015		0.3772	0.6778		1113962	1114870	-	WP_010922189.1		M5005_Spy_0720			putative exfoliative toxin	NE
SP5448_RS05725		-0.3964	0.7464		0.7266	0.5435		1.308	0.2743		1115107	1115526	-	WP_002993519.1		M5005_Spy_0719			glutathione S-transferase	NE
SP5448_RS05730		0.8832	0.2891		-0.5834	0.484		1.1	0.2252		1115837	1116823	-	WP_010922187.1		M5005_Spy_0717			rhodanese-related sulfurtransferases	NE
SP5448_RS05735		-0.1385	0.8734		0.4412	0.6101		-0.3563	0.7013		1117022	1117324	+	WP_002984904.1		M5005_Spy_0716			hypothetical protein	NE
SP5448_RS05745		0	1		0	1		0	1		1117871	1119076	-	WP_002984905.1		M5005_Spy_0715			SSU ribosomal protein S1P	E
SP5448_RS05760		-0.3843	0.737		-0.4058	0.7255		-0.2084	0.8496		1119467	1119697	-	WP_002984906.1		M5005_Spy_0714			hypothetical cytosolic protein	NC
SP5448_RS05765		0.02935	0.9782		1.129	0.2832		0.3494	0.7496		1119761	1120783	-	WP_010922186.1		M5005_Spy_0713	bcaT		branched-chain amino acid aminotransferase	NE
SP5448_RS05770		-0.5151	0.5206		-1.481	0.06485		-0.9621	0.2681		1120906	1123365	-	WP_011054387.1		M5005_Spy_0712	parC		topoisomerase IV subunit A	E
SP5448_RS05775		-0.06685	0.9533		0.09409	0.9349		0.1151	0.9163		1123456	1125405	-	WP_011285491.1		M5005_Spy_0711	parE		topoisomerase IV subunit B	E
SP5448_RS05780		-0.1731	0.8784		0.007186	0.995		0.2687	0.8056		1125540	1126181	+	WP_002984911.1		M5005_Spy_0710			hypothetical membrane spanning protein	E
SP5448_RS05785		1.317	0.1065		1.799	0.02726		1.14	0.1955		1126239	1127507	-	WP_011285490.1		M5005_Spy_0709	pyrC		dihydroorotase	NE
SP5448_RS05790		-0.2161	0.8227		-1.142	0.2356		-0.2108	0.8381		1127639	1128292	-	WP_002984913.1		M5005_Spy_0708	ung		uracil-DNA glycosylase	NE
SP5448_RS05795		0.515	0.6714		0.1764	0.8814		1.887	0.1134		1128425	1129075	-	WP_003061805.1		M5005_Spy_0707			cystine transport system permease protein	NE
SP5448_RS05800		0.1314	0.8859		0.4655	0.6093		-1.296	0.1922		1129104	1129967	-	WP_011285489.1		M5005_Spy_0706			cystine-binding protein	NE
SP5448_RS05805		0.407	0.6118		0.4807	0.549		1.28	0.1421		1130085	1131539	-	WP_010922181.1		M5005_Spy_0705	amiC		amidase family protein	NE
SP5448_RS05810		-0.1113	0.8949		-1.335	0.1132		-0.4652	0.614		1131736	1132365	-	WP_010922180.1		M5005_Spy_0704	pyrE		orotate phosphoribosyltransferase	NE
SP5448_RS05815		0.3732	0.6492		0.5982	0.4656		0.6929	0.436		1132423	1133115	-	WP_011285488.1		M5005_Spy_0703	pyrF		orotidine 5'-phosphate decarboxylase	NE
SP5448_RS05820		0.8663	0.4558		-3.047	0.008647		-3.818	0.001466		1133392	1133928	-	WP_002984923.1		M5005_Spy_0702			hypothetical protein	NE
SP5448_RS05825		0.2819	0.7982		-0.8557	0.4334		1.012	0.3659		1134150	1135055	+	WP_002984924.1		M5005_Spy_0701	cpsY		transcriptional regulator, LysR family	NE
SP5448_RS05830		-0.2104	0.6937		-0.1389	0.7981		-1.783	0.003345		1135134	1135922	-	WP_002994010.1		M5005_Spy_0700	cpsX		attenuator of transcription, LytR family regulator	NE
SP5448_RS05835		-0.6808	0.5506		-0.496	0.667		-0.2756	0.8018		1135915	1136628	-	WP_002990147.1		M5005_Spy_0699	deoD2		purine nucleoside phosphorylase	NE
SP5448_RS05840		-0.06358	0.9558		-1.878	0.1023		-1.849	0.1197		1137291	1138100	-	WP_010922178.1		M5005_Spy_0698	punA		purine nucleoside phosphorylase	NC
SP5448_RS05845		0.4846	0.4654		1.515	0.02366		1.136	0.1227		1138084	1138524	-	WP_010922177.1		M5005_Spy_0697	arsC		arsenate reductase family protein	NE
SP5448_RS05850		-2.03	0.1189		-1.189	0.3556		-1.545	0.2053		1138543	1139754	-	WP_002994004.1		M5005_Spy_0696	deoB		phosphopentomutase	NE
SP5448_RS05855		1.061	0.4225		2.273	0.07962		1.116	0.3708		1139831	1140514	-	WP_010922176.1		M5005_Spy_0695	rpiA		ribose 5-phosphate isomerase	C
SP5448_RS05860		-0.2511	0.7526		0.1424	0.8581		2.24	0.009685		1140893	1142992	+	WP_010922175.1		M5005_Spy_0694	clpL		ATP-dependent protease ATP-binding subunit	NE
SP5448_RS05865		-0.5885	0.4116		-2.843	8.099e-05		-1.661	0.0362		1143050	1143793	-	WP_002984942.1		M5005_Spy_0693	vfr		Vfr-Rgg/RopB peptide inhibitor of SpeB	NE
SP5448_RS05870		0	1		0	1		0	1		1143941	1144540	-	WP_002984945.1		M5005_Spy_0692			GTP-binding protein	E
SP5448_RS05875		-0.9274	0.4188		-0.7399	0.5232		-0.5616	0.6101		1144550	1145779	-	WP_002984948.1		M5005_Spy_0691	clpX		ATP-dependent clp protease ATP-binding subunit	NE
SP5448_RS05885		0.5697	0.6154		0	1		0	1		1146099	1146596	-	WP_011285487.1		M5005_Spy_0689	dyr		dihydrofolate reductase	E
SP5448_RS05890		-0.8674	0.4979		-0.233	0.8546		-0.207	0.8634		1146676	1147515	-	WP_010922172.1		M5005_Spy_0688	thyA		thymidylate synthase	NC
SP5448_RS05895		0	1		0	1		0	1		1147724	1148899	+	WP_010922171.1		M5005_Spy_0687	mvaS.1		hydroxymethylglutaryl-CoA synthase	E
SP5448_RS05900		-0.1191	0.9096		0.9127	0.3765		0.5993	0.5856		1148886	1150163	+	WP_010922170.1		M5005_Spy_0686			3-hydroxy-3-methylglutaryl-coenzyme A reductase	C
SP5448_RS05905		-0.366	0.7553		-1.617	0.1661		0.6431	0.5795		1150393	1151382	-	WP_010922169.1		M5005_Spy_0685			isopentenyl-diphosphate delta-isomerase	E
SP5448_RS05910		0	1		0	1		0	1		1151375	1152382	-	WP_010922168.1		M5005_Spy_0684	mvaK2		phosphomevalonate kinase	NC
SP5448_RS05915		0	1		0	1		0	1		1152375	1153319	-	WP_010922167.1		M5005_Spy_0683	mvaD		diphosphomevalonate decarboxylase	E
SP5448_RS05920		0	1		0	1		0	1		1153301	1154179	-	WP_015055939.1		M5005_Spy_0682	mvaK1		mevalonate kinase	E
SP5448_RS05925		-0.8656	0.342		0.8921	0.3236		-0.504	0.6014		1154473	1155705	-	WP_010922165.1		M5005_Spy_0681	sptS		TCS-4 histidine kinase; saliva persistence	NE
SP5448_RS05930		0.07165	0.9541		-0.3216	0.7922		1.579	0.1894		1155714	1156382	-	WP_002984985.1		M5005_Spy_0680	sptR		TCS-4 response regulator; saliva persistence	NE
SP5448_RS05935		0.1479	0.8684		-0.9577	0.2828		-0.1951	0.8405		1156385	1157035	-	WP_002984988.1		M5005_Spy_0679			GTP pyrophosphokinase	NE
SP5448_RS05940		0.3254	0.6209		0.3498	0.5984		1.1	0.132		1157255	1159267	+	WP_010922164.1		M5005_Spy_0678	S5nA		5'-nucleotidase;putative virulence factor	NE
SP5448_RS05945		-0.3383	0.6992		-1.519	0.08133		0.7172	0.4447		1159349	1159759	-	WP_002984994.1		M5005_Spy_0677	fms		peptide deformylase	NE
SP5448_RS05950		0.5269	0.5994		0.326	0.7439		2.343	0.02596		1160015	1160233	-	WP_011285486.1		M5005_Spy_0676			hypothetical protein	NE
SP5448_RS05955		0.1825	0.8565		1.325	0.1825		0.2946	0.7786		1160651	1162528	-	WP_010922163.1		M5005_Spy_0674			ABC transporter ATP-binding protein uup	NE
SP5448_RS05960		0.7659	0.5014		0	1		0.8337	0.4456		1162525	1163733	-	WP_011285485.1		M5005_Spy_0673	papS		poly(A) polymerase/tRNA nucleotidyltransferase	E
SP5448_RS05965		-0.7908	0.4531		-0.8859	0.3965		0.4544	0.6763		1163858	1164706	-	WP_010922161.1		M5005_Spy_0672			degV family protein	NE
SP5448_RS05970		0	1		0	1		0	1		1164706	1165086	-	WP_002985011.1		M5005_Spy_0671			transposase	NE
SP5448_RS05975		-0.0977	0.9352		0.4159	0.7305		-0.1519	0.894		1165314	1165490	-	WP_002990197.1		M5005_Spy_0670			nucleoside diphosphate kinase	NE
SP5448_RS05980		-0.6364	0.4538		-0.8547	0.3128		-0.5909	0.5168		1165989	1167008	+	WP_010922160.1		M5005_Spy_0668	mac/ideS		IgG-degrading protease	NE
SP5448_RS05985		-0.3918	0.7425		-1.276	0.2787		0.4045	0.7312		1167183	1167392	+	WP_011285483.1		M5005_Spy_0667			exotoxin type C precursor	NC
SP5448_RS05990		-0.1676	0.8588		-0.4251	0.6484		-1.202	0.2256		1167689	1167907	+	WP_002985029.1		M5005_Spy_0665			transposase	NE
SP5448_RS05995		0.2834	0.7879		-0.4338	0.6767		0.2255	0.8356		1167964	1168671	-	WP_002990206.1		M5005_Spy_0664	mur1.2		autolysin	NE
SP5448_RS06000		1.008	0.385		0.1158	0.9196		-1.825	0.1293		1168823	1169422	-	WP_010922159.1		M5005_Spy_0663	mur1.1		autolysin	NE
SP5448_RS06005		0.794	0.3575		1.474	0.08639		1.774	0.05511		1169515	1171461	-	WP_010922158.1		M5005_Spy_0662	fruA		PTS system, Fructose-specific IIABC	NE
SP5448_RS06010		-0.8805	0.445		-0.8838	0.4474		-0.763	0.4894		1171458	1172369	-	WP_010922157.1		M5005_Spy_0661	fruB		1-phosphofructokinase	NE
SP5448_RS06015		1.013	0.3197		1.04	0.3012		0.597	0.5737		1172366	1173079	-	WP_002990215.1		M5005_Spy_0660	fruR		fructose repressor	NE
SP5448_RS06020		0.5641	0.4986		2.015	0.0156		0.6363	0.4911		1173335	1174258	-	WP_010922156.1		M5005_Spy_0659	apbA		2-dehydropantoate 2-reductase	NE
SP5448_RS06025		0.1907	0.8149		0.2625	0.7471		1.994	0.02368		1174271	1175329	-	WP_002985048.1		M5005_Spy_0658			regulatory protein	NE
SP5448_RS06030		-0.6353	0.4741		-5.105	7.753e-07		-1.622	0.09902		1175507	1176499	-	WP_010922155.1		M5005_Spy_0657	hupX		Heme-metabolism; thioredoxin reductase	NE
SP5448_RS06035		0.3088	0.7851		0	1		0	1		1176499	1177230	-	WP_010922154.1		M5005_Spy_0656	trmD		tRNA (guanine-N(1)-)-methyltransferase	E
SP5448_RS06040		-0.1711	0.8799		0.01191	0.9917		0.2747	0.8014		1177220	1177738	-	WP_010922153.1		M5005_Spy_0655	rimM		16S rRNA processing protein	NE
SP5448_RS06045		0.05247	0.9518		-0.1227	0.8871		0.948	0.3074		1177953	1178474	-	WP_002985059.1		M5005_Spy_0654			transcriptional regulator, TetR family	NE
SP5448_RS06050		-0.2607	0.7628		-0.1454	0.8659		2.104	0.02373		1178610	1179485	+	WP_010922152.1		M5005_Spy_0653	czcD		cobalt-zinc-cadmium resistance protein	NE
SP5448_RS06055		0.02894	0.9813		0.004029	0.9974		-1.464	0.2334		1179665	1180066	-	WP_002985067.1		M5005_Spy_0652	hupZ		Heme-oxygenase cytosolic protein	NE
SP5448_RS06060		0.1228	0.8827		-0.3608	0.6639		0.5473	0.5418		1180086	1183112	-	WP_010922151.1		M5005_Spy_0651	hupY		Heme-utilization cell surface protein	NE
SP5448_RS06065		-1.253	0.3413		-2.299	0.07507		-1.433	0.2499		1184023	1184262	-	WP_002985072.1		M5005_Spy_0649			RNA binding protein	NE
SP5448_RS06070		-0.0004848	0.9997		0.03141	0.9781		0.2911	0.7898		1184272	1184544	-	WP_002985074.1		M5005_Spy_0648	rpsP		SSU ribosomal protein S16P	NE
SP5448_RS06075		0.6671	0.4299		0.2268	0.7879		1.335	0.1416		1184671	1186404	-	WP_010922150.1		M5005_Spy_0647			glycerophosphoryl diester phosphodiesterase	NE
SP5448_RS06080		-0.4304	0.5643		-0.03584	0.9618		-1.068	0.1916		1186658	1187878	-	WP_010922149.1		M5005_Spy_0646			ABC transporter permease protein	NE
SP5448_RS06085		0.1932	0.8579		0.5907	0.5771		-1	0.3671		1187890	1188576	-	WP_002993627.1		M5005_Spy_0645			ABC transporter ATP-binding protein	NE
SP5448_RS06090		0.1258	0.8317		0.009321	0.9876		0.1598	0.8094		1188600	1189871	-	WP_010922148.1		M5005_Spy_0644			periplasmic component of efflux system	NE
SP5448_RS06095		-0.3095	0.6426		-0.5683	0.3981		-0.3171	0.6677		1190078	1193254	-	WP_010922147.1		M5005_Spy_0643	carB		carbamoyl-phosphate synthase large chain	NE
SP5448_RS06100		0.3206	0.7615		-1.263	0.2292		-1.695	0.1263		1193480	1194562	-	WP_002985087.1		M5005_Spy_0642	carA		carbamoyl-phosphate synthase small chain	NE
SP5448_RS06105		-0.3059	0.7785		-1.744	0.1048		1.262	0.2541		1194606	1195541	-	WP_004218947.1		M5005_Spy_0641	pyrB		aspartate carbamoyltransferase	NE
SP5448_RS06110		0.2719	0.7476		-0.1706	0.8395		1.686	0.06369		1195602	1196861	-	WP_002990245.1		M5005_Spy_0640	pyrP		uracil permease	NE
SP5448_RS06115		-0.9224	0.4218		-0.663	0.5676		-0.5759	0.6012		1196877	1197398	-	WP_002985093.1		M5005_Spy_0639	pyrR		pyrR bifunctional protein	NE
SP5448_RS06120		0.7721	0.3412		0.5154	0.5263		-0.6928	0.4446		1197794	1198684	-	WP_002985094.1		M5005_Spy_0638			ribosomal large subunit pseudouridine synthase D	NE
SP5448_RS06125		-0.2232	0.8638		-0.1619	0.8997		-0.6505	0.5929		1198674	1199132	-	WP_010922145.1		M5005_Spy_0637	lsp		lipoprotein signal peptidase	NE
SP5448_RS06130		-1.019	0.4215		-0.816	0.5175		-1.009	0.397		1199129	1200043	-	WP_002990246.1		M5005_Spy_0636			transcriptional regulator, LysR family	NE
SP5448_RS06135		0	1		0	1		0.6935	0.5253		1200391	1200684	-	WP_002985110.1		M5005_Spy_0635	rpmA		LSU ribosomal protein L27P	NC
SP5448_RS06140		0	1		0	1		0	1		1200712	1201038	-	WP_002985112.1		M5005_Spy_0634			hypothetical ribosome-associated protein	NC
SP5448_RS06145		0	1		0	1		0	1		1201050	1201364	-	WP_002985116.1		M5005_Spy_0633	rplU		LSU ribosomal protein L21P	NC
SP5448_RS06150		0.1993	0.823		0.4103	0.6436		-0.9138	0.3438		1201578	1202771	-	WP_015446137.1		M5005_Spy_0632	capA		capsule biosynthesis protein	NE
SP5448_RS06155		0.04675	0.9558		-0.3728	0.6574		-0.9698	0.2844		1202908	1204122	-	WP_011285481.1		M5005_Spy_0631	thiI		thiamine biosynthesis protein	NE
SP5448_RS06160		0.1856	0.7905		-0.403	0.5666		-0.5784	0.4524		1204134	1205276	-	WP_011285480.1		M5005_Spy_0630	nifS1		cysteine desulfhydrase	NE
SP5448_RS06165		-0.1118	0.9285		0.3711	0.761		-1.516	0.2181		1205511	1205951	+	WP_010922142.1		M5005_Spy_0629			hypothetical protein	NE
SP5448_RS06170		-1.869	0.08658		-1.599	0.1376		0.1007	0.9277		1205981	1207249	+	WP_002990257.1		M5005_Spy_0628	folC.2		folylpolyglutamate synthase/dihydrofolate synthase	NE
SP5448_RS06175		0.8761	0.2558		0.9416	0.2244		2.816	0.001256		1207337	1208689	-	WP_010922141.1		M5005_Spy_0627	gor		glutathione reductase	NE
SP5448_RS06180		0.2602	0.8275		-0.5756	0.6251		-2.147	0.07706		1208910	1209251	-	WP_010922140.1		M5005_Spy_0626			hypothetical cytosolic protein	NE
SP5448_RS06185		0.492	0.5928		0.08509	0.9262		-0.6294	0.5312		1209312	1210478	-	WP_010922139.1		M5005_Spy_0625	aroF		chorismate synthase	NE
SP5448_RS06190		-0.5174	0.6901		-0.5147	0.6883		-0.7669	0.5277		1210572	1211258	-	WP_002985140.1		M5005_Spy_0624	aroD		3-dehydroquinate dehydratase	NE
SP5448_RS06195		-0.3399	0.6373		-0.1141	0.875		1.433	0.07146		1211255	1212418	-	WP_002985142.1		M5005_Spy_0623			methyltransferase	NE
SP5448_RS06200		-0.4365	0.7043		-0.4768	0.6812		0.04102	0.9703		1212526	1214736	+	WP_010922138.1		M5005_Spy_0622			phosphoglycerol transferase	E
SP5448_RS06205		0.1248	0.9145		0.1917	0.8699		1.726	0.122		1215027	1215386	-	WP_002985149.1		M5005_Spy_0621	rplT		LSU ribosomal protein L20P	NC
SP5448_RS06210		0	1		0	1		0	1		1215445	1215642	-	WP_002985151.1		M5005_Spy_0620	rpl36		LSU ribosomal protein L35P	C
SP5448_RS06215		0	1		0	1		0	1		1215684	1216214	-	WP_002985152.1		M5005_Spy_0619	infC		bacterial protein translation initiation factor 3	C
SP5448_RS06220		-0.4001	0.7242		-0.2262	0.8435		0.02666	0.9805		1216376	1217056	-	WP_002990268.1		M5005_Spy_0618	cmk		cytidylate kinase	C
SP5448_RS06225		0.4274	0.7076		0.05773	0.9599		0.2741	0.8022		1217071	1217547	-	WP_002990270.1		M5005_Spy_0617			hypothetical membrane associated protein	NC
SP5448_RS06230		-0.903	0.4464		-0.8643	0.4585		-2.058	0.08848		1217780	1218268	-	WP_002990272.1		M5005_Spy_0615	ebsA		pore forming protein	NE
SP5448_RS06235		0.1411	0.8614		1.238	0.1252		1.324	0.1312		1218309	1219532	-	WP_010922137.1		M5005_Spy_0614	pepT		peptidase T	NE
SP5448_RS06240		0.04819	0.9682		-2.184	0.0667		1.501	0.2034		1219626	1221122	-	WP_002990274.1		M5005_Spy_0613	gacL		Group A Carbohydrate; Membrane protein	E
SP5448_RS06245		0.1122	0.9315		0.08713	0.9456		-1.03	0.4088		1221103	1222389	-	WP_010922136.1		M5005_Spy_0612	amrA/gacK		Group A Carbohydrate; Wzx flippase; Mga regulation	C
SP5448_RS06250		-0.2058	0.8195		-2.783	0.001905		0.3465	0.7181		1222382	1222723	-	WP_002985167.1		M5005_Spy_0611	gacJ		Group A Carbohydrate; Membrane protein	NE
SP5448_RS06255		-0.4718	0.6792		-2.706	0.01681		-1.131	0.3246		1222725	1223420	-	WP_002985169.1		M5005_Spy_0610	gacI		Group A Carbohydrate; glycosyltransferase	NE
SP5448_RS06260		0.9078	0.2576		-0.6246	0.4361		-1.078	0.2143		1223599	1226073	-	WP_011285478.1		M5005_Spy_0609	gacH		Group A Carbohydrate; phosphoglycerol transferase	NE
SP5448_RS06265		0	1		0.6993	0.5423		0.6491	0.5522		1226070	1227815	-	WP_010922134.1		M5005_Spy_0608	gacG		Group A Carbohydrate; alpha-L-Rha alpha-1,2-L-rhamnosyltransferase	E
SP5448_RS06270		-0.09278	0.9382		-0.2777	0.8171		0.7971	0.4847		1227812	1228819	-	WP_010922133.1		M5005_Spy_0607	gacF		Group A Carbohydrate; glycosyltransferase	E
SP5448_RS06275		-0.1504	0.8944		0.2816	0.806		0.2897	0.7909		1228844	1230049	-	WP_002985176.1		M5005_Spy_0606	gacE		Group A Carbohydrate; polysaccharide export ATP-binding	E
SP5448_RS06280		0	1		0	1		0	1		1230049	1230852	-	WP_002985178.1		M5005_Spy_0605	gacD		Group A Carbohydrate; polysaccharide export ABC transporter permease	E
SP5448_RS06285		0	1		0	1		0	1		1230855	1231787	-	WP_010922131.1		M5005_Spy_0604	gacC		Group A Carbohydrate; alpha-L-Rha alpha-1,3-L-rhamnosyltransferase	E
SP5448_RS06290		-0.16	0.8876		0.005767	0.996		0.4698	0.667		1231777	1232931	-	WP_010922130.1		M5005_Spy_0603	gacB		Group A Carbohydrate; alpha-(1,2)-rhamnosyltransferase	E
SP5448_RS06295		-0.1688	0.8832		0.00846	0.9942		-0.1273	0.9079		1233050	1233904	-	WP_010922129.1		M5005_Spy_0602	gacA		Group A Carbohydrate; dTDP-4-dehydrorhamnose reductase	E
SP5448_RS06300		-0.1863	0.863		-3.933	0.0002548		-0.256	0.8163		1234042	1234380	-	WP_002990295.1		M5005_Spy_0601			hypothetical cytosolic protein	NE
SP5448_RS06305		0	1		0	1		0	1		1234616	1235725	-	WP_002985187.1		M5005_Spy_0600	rpoD		RNA polymerase sigma factor	E
SP5448_RS06310		0.3519	0.79		0.8422	0.5162		-0.4279	0.7303		1235734	1237548	-	WP_011285477.1		M5005_Spy_0599	dnaG		DNA primase	E
SP5448_RS06315		0.9079	0.3547		0.1931	0.8429		-0.7916	0.4496		1237679	1238041	+	WP_002990299.1		M5005_Spy_0598	mscL		large-conductance mechanosensitive channel	NE
SP5448_RS06320		0	1		0	1		0	1		1238169	1238345	-	WP_000048058.1		M5005_Spy_0597			SSU ribosomal protein S21P	E
SP5448_RS06325		0.5572	0.6048		-1.208	0.2587		0.6348	0.5651		1238486	1239298	-	WP_002990394.1		M5005_Spy_0596			arginine-binding protein	NE
SP5448_RS06330		-1.825	0.103		-1.672	0.1285		-1.861	0.1071		1239438	1243070	-	WP_032459868.1		M5005_Spy_0595	rexA		ATP-dependent nuclease subunit A	C
SP5448_RS06335		-0.1419	0.9063		1.512	0.1986		-1.87	0.1255		1243067	1246282	-	WP_010922126.1		M5005_Spy_0594	rexB		ATP-dependent nuclease subunit B	NC
SP5448_RS06340		0.5944	0.6135		-0.1181	0.9189		1.853	0.1112		1246433	1247350	+	WP_011285474.1		M5005_Spy_0593			neutral zinc metallopeptidase family	NE
SP5448_RS06345		-0.4848	0.6095		-0.3142	0.738		-0.908	0.3624		1247452	1248120	-	WP_011285473.1		M5005_Spy_0592	hrtB		ABC transporter ATP-binding;Hrt-like Heme efflux system	NE
SP5448_RS06350		0.3917	0.6395		0.0843	0.9196		2.412	0.007724		1248130	1249206	-	WP_010922123.1		M5005_Spy_0591	hrtA		ABC transporter permease;Hrt-like Heme efflux system	NE
SP5448_RS06355		-0.3986	0.76		-0.2785	0.8287		-0.6057	0.6199		1249279	1249665	-	WP_002990406.1		M5005_Spy_0590			hypothetical protein	NE
SP5448_RS06360		0.03694	0.9757		-1.909	0.1144		-1.642	0.1776		1249658	1250035	-	WP_002993028.1		M5005_Spy_0589			salt-stress induced protein	NE
SP5448_RS06365		0.4297	0.7051		0.6499	0.5716		0	1		1250145	1252550	-	WP_010922122.1		M5005_Spy_0588	pheT		phenylalanyl-tRNA synthetase beta chain	E
SP5448_RS06370		-0.2626	0.8172		-0.2129	0.8529		0.02822	0.9794		1252760	1253803	-	WP_003061661.1		M5005_Spy_0587	pheS		phenylalanyl-tRNA synthetase alpha chain	E
SP5448_RS06380		-1.282	0.3324		-0.5176	0.6896		-1.286	0.3013		1254661	1254849	-	WP_010922120.1		M5005_Spy_0585	epuA		epuA protein	NE
SP5448_RS06385		0.08756	0.9392		-0.4206	0.7099		-0.2224	0.8473		1254853	1256124	-	WP_002994428.1		M5005_Spy_0584	murA		UDP-N-acetylglucosamine 1-carboxyvinyltransferase	NE
SP5448_RS06390		1.044	0.3866		0.5219	0.6594		0.3135	0.7929		1256189	1256446	-	WP_002994426.1		M5005_Spy_0583			hypothetical membrane associated protein	NE
SP5448_RS06395		0.1968	0.8645		-0.06352	0.9564		0.1044	0.9246		1256712	1257128	-	WP_003050138.1		M5005_Spy_0582	atpC		ATP synthase epsilon chain; F1F0 H+-ATP Synthase	NC
SP5448_RS06400		0	1		0	1		0	1		1257141	1258547	-	WP_010922119.1		M5005_Spy_0581	atpD		ATPase, beta subunit; F1F0 H+-ATP Synthase	E
SP5448_RS06405		0	1		0	1		0	1		1258709	1259584	-	WP_002985236.1		M5005_Spy_0580	atpG		ATP synthase gamma chain; F1F0 H+-ATP Synthase	E
SP5448_RS06410		0	1		0	1		0	1		1259600	1261108	-	WP_002985238.1		M5005_Spy_0579	atpA		ATP synthase alpha chain; F1F0 H+-ATP Synthase	E
SP5448_RS06415		0	1		0	1		0	1		1261124	1261660	-	WP_010922118.1		M5005_Spy_0578	atpH		ATP synthase delta chain; F1F0 H+-ATP Synthase	E
SP5448_RS06420		0	1		0	1		0	1		1261660	1262154	-	WP_010922117.1		M5005_Spy_0577	atpF		ATP synthase B chain; F1F0 H+-ATP Synthase	E
SP5448_RS06425		0	1		0	1		0	1		1262172	1262888	-	WP_003050130.1		M5005_Spy_0576	atpB		ATP synthase A chain; F1F0 H+-ATP Synthase	NC
SP5448_RS06430		0	1		0	1		0	1		1262923	1263120	-	WP_002985249.1		M5005_Spy_0575	atpE		ATP synthase C chain; F1F0 H+-ATP Synthase	NC
SP5448_RS06435		-0.1196	0.9237		-0.1703	0.8894		1.421	0.2408		1263513	1264535	-	WP_010922116.1		M5005_Spy_0574			diacylglycerol kinase family	E
SP5448_RS06440		-0.7381	0.5324		-1.056	0.3648		-1.131	0.342		1264549	1266507	-	WP_010922115.1		M5005_Spy_0573	lig		NAD-dependent DNA ligase	E
SP5448_RS06445		0.4185	0.5198		-0.4548	0.4887		0.4212	0.5637		1266701	1267201	-	WP_002985256.1		M5005_Spy_0572			hypothetical membrane spanning protein	NE
SP5448_RS06450		0.4747	0.5661		0.5983	0.4688		1.252	0.1613		1267479	1270211	-	WP_010922113.1		M5005_Spy_0571			endonuclease/exonuclease/phosphatase family protein	NE
SP5448_RS06455		0.4026	0.6929		-1.455	0.1569		-1.359	0.222		1270782	1271900	-	WP_010922112.1		M5005_Spy_0570	sagI		streptolysin S export transmembrane protein	NE
SP5448_RS06460		-0.2475	0.8516		-1.456	0.2623		-1.311	0.2913		1271897	1273024	-	WP_010922111.1		M5005_Spy_0569	sagH		streptolysin S export transmembrane protein	NE
SP5448_RS06465		-0.5191	0.6567		-0.8069	0.4922		-0.7058	0.5263		1273033	1273956	-	WP_002990429.1		M5005_Spy_0568	sagG		streptolysin S export ATP-binding protein	NE
SP5448_RS06470		0.1829	0.8392		-0.2393	0.7891		-0.1559	0.8705		1273979	1274662	-	WP_010922110.1		M5005_Spy_0567	sagF		streptolysin S biosynthesis protein	NE
SP5448_RS06475		0.3184	0.774		-0.6015	0.5812		-2.018	0.07426		1274659	1275330	-	WP_002985272.1		M5005_Spy_0566	sagE		streptolysin S putative self-immunity protein	NE
SP5448_RS06480		-0.277	0.663		-1.158	0.07203		0.5875	0.4253		1275305	1276663	-	WP_002990434.1		M5005_Spy_0565	sagD		streptolysin S biosynthesis protein	NE
SP5448_RS06485		0.4659	0.6781		-0.594	0.5916		-0.4243	0.7087		1276683	1277741	-	WP_010922109.1		M5005_Spy_0564	sagC		streptolysin S biosynthesis protein	NE
SP5448_RS06490		-0.6834	0.4985		0.01721	0.9862		0.8091	0.4411		1277738	1278688	-	WP_010922108.1		M5005_Spy_0563	sagB		streptolysin S biosynthesis protein	NE
SP5448_RS06495		-1.582	0.1795		-1.447	0.2114		-2.543	0.03463		1278910	1279071	-	WP_002985285.1		M5005_Spy_0562	sagA		streptolysin S precursor	NE
SP5448_RS06500		-0.06635	0.9217		0.08264	0.9034		1.311	0.07927		1279936	1286115	-	WP_011285469.1		M5005_Spy_0561	epf		putative extracellular matrix binding protein	NE
SP5448_RS06505		0.1968	0.8037		-0.3347	0.6731		1.169	0.1777		1286587	1287474	+	WP_011285468.1		M5005_Spy_0560			transcriptional regulator	NE
SP5448_RS06510		0.2413	0.8155		-2.159	0.03931		-2.783	0.01497		1287675	1288127	+	WP_015446123.1		M5005_Spy_0559	ralp3		RofA-like Protein 3; Ralp3 transcriptional regulator; PCVR	NE
SP5448_RS06520		0	1		0	1		0	1		1289905	1291212	-	WP_002985288.1		M5005_Spy_0556	eno		enolase	E
SP5448_RS06525		0.581	0.5857		-0.4594	0.6614		1.205	0.2698		1291439	1291897	+	WP_002990451.1		M5005_Spy_0555			hypothetical cytosolic protein	NE
SP5448_RS06530		0	1		0	1		0	1		1292029	1293753	-	WP_010922105.1		M5005_Spy_0554			septation ring formation regulator	E
SP5448_RS06535		-0.0004848	0.9997		0.03141	0.9781		0.2911	0.7898		1294121	1296073	-	WP_010922104.1		M5005_Spy_0553	gyrB		DNA gyrase subunit B	E
SP5448_RS06540		0.601	0.5581		-0.2056	0.8396		0.7315	0.4928		1296074	1296643	-	WP_011285465.1		M5005_Spy_0552			DNA gyrase related protein	NE
SP5448_RS06550		-0.9103	0.4271		-0.7284	0.5294		-0.5449	0.6206		1297646	1297993	-	WP_002985298.1		M5005_Spy_0551	rplS		LSU ribosomal protein L19P	NC
SP5448_RS06555		-0.04929	0.9513		-0.2059	0.7985		0.9707	0.2697		1298108	1299370	-	WP_011285464.1		M5005_Spy_0550			chloride channel protein	NE
SP5448_RS06560		-0.3132	0.7505		0.5913	0.5441		-0.01884	0.9855		1299363	1299647	-	WP_010922101.1		M5005_Spy_0549			chorismate mutase	NE
SP5448_RS06565		-0.1328	0.9135		0.03169	0.9793		-0.3341	0.7725		1299823	1300272	-	WP_002985303.1		M5005_Spy_0548			flavodoxin	C
SP5448_RS06570		-1.131	0.3731		-1.386	0.2714		-1.226	0.304		1300666	1301607	+	WP_010922100.1		M5005_Spy_0547			phosphoesterase, DHH family protein	NC
SP5448_RS06575		0	1		0	1		0	1		1301722	1301982	+	WP_002985307.1		M5005_Spy_0546	rpmE		LSU ribosomal protein L31P	C
SP5448_RS06580		-0.3849	0.6932		0.2247	0.8162		1.913	0.06223		1302079	1303278	-	WP_011285463.1		M5005_Spy_0545	agaS		galactosamine-6-phosphate deaminase (isomerizing)	NE
SP5448_RS06585		-0.2056	0.8233		-0.6137	0.5022		-0.08789	0.9286		1303297	1304019	-	WP_010922098.1		M5005_Spy_0544			transcriptional regulator, GntR family	NE
SP5448_RS06590		-1.22	0.213		0.267	0.7835		-3.687	0.0008497		1304167	1305714	-	WP_011285462.1		M5005_Spy_0543	adcA		high-affinity zinc uptake system protein znuA precursor	NE
SP5448_RS06595		-0.5942	0.5751		-0.2364	0.8206		0.6974	0.5211		1305866	1307263	-	WP_011285461.1		M5005_Spy_0542	pepD		dipeptidase	NE
SP5448_RS06600		-0.5878	0.4996		-0.9504	0.2728		-3.616	0.0001154		1307396	1308307	-	WP_002985428.1		M5005_Spy_0541			hypothetical cytosolic protein	NE
SP5448_RS06605		0.4388	0.594		-0.1084	0.8952		0.1801	0.8406		1308304	1309281	-	WP_002985431.1		M5005_Spy_0540			transporter	NE
SP5448_RS06610		-0.9679	0.4523		-1.487	0.2391		-2.217	0.07441		1309278	1310168	-	WP_002985434.1		M5005_Spy_0539			ATP-binding protein	NE
SP5448_RS06615		0.2559	0.8459		-0.6923	0.5927		0.8421	0.4953		1310582	1311928	-	WP_002985437.1		M5005_Spy_0538	asnS		asparaginyl-tRNA synthetase	E
SP5448_RS06620		-0.1998	0.8364		-2.162	0.0243		-0.85	0.4047		1311949	1313142	-	WP_002985439.1		M5005_Spy_0537	aspC		aspartate aminotransferase	NE
SP5448_RS06625		-0.007796	0.992		-0.2567	0.7426		0.207	0.8084		1313477	1315936	-	WP_011285460.1		M5005_Spy_0536	dinG		ATP-dependent helicase	NE
SP5448_RS06630		-0.2648	0.8175		-0.4622	0.6833		-1.247	0.2887		1316236	1316850	-	WP_011285458.1		M5005_Spy_0534			(R,R)-butanediol dehydrogenase/acetoin dehydrogenase	NE
SP5448_RS06635		-0.359	0.6836		1.458	0.09552		-3.315	0.0006533		1317081	1317716	+	WP_011285457.1		M5005_Spy_0533			hydroxyacylglutathione hydrolase	NE
SP5448_RS06640		0	1		0	1		0	1		1318026	1318955	-	WP_002990498.1		M5005_Spy_0532	ftsX		cell division protein	C
SP5448_RS06645		-0.8348	0.4881		-0.6908	0.5672		0.2963	0.7961		1318948	1319640	-	WP_002985455.1		M5005_Spy_0531	ftsE		cell division ATP-binding protein	NC
SP5448_RS06650		0	1		0	1		0	1		1319659	1320672	-	WP_010922048.1		M5005_Spy_0530	prfB		bacterial peptide chain release factor 2	E
SP5448_RS06655		0.6237	0.5119		0.7662	0.4154		2.258	0.02372		1320826	1321950	-	WP_015055933.1		M5005_Spy_0529			iron-sulfur cluster-binding protein	NE
SP5448_RS06660		0.01959	0.9787		0.9012	0.2217		-0.2697	0.7378		1322642	1323292	-	WP_011285456.1		M5005_Spy_0528			beta-phosphoglucomutase/glucose-1-phosphate phosphodismutase	NE
SP5448_RS06665		0.2658	0.7753		0.3135	0.734		-2.797	0.004715		1323588	1324223	-	WP_010922045.1		M5005_Spy_0527	kgdA		4-hydroxy-2-oxoglutarate aldolase/2-dehydro-3-deoxyphosphogluconate aldolase	NE
SP5448_RS06670		0.2009	0.7438		0.2047	0.742		0.8243	0.2295		1324228	1325229	-	WP_010922044.1		M5005_Spy_0526			2-dehydro-3-deoxygluconokinase	NE
SP5448_RS06675		0.1344	0.843		-0.2967	0.6645		-1.985	0.008316		1325258	1325899	-	WP_010922043.1		M5005_Spy_0525			galactose-6-phosphate isomerase LacB subunit	NE
SP5448_RS06680		0.01261	0.9884		2.726	0.001565		0.861	0.3526		1325924	1326718	-	WP_010922042.1		M5005_Spy_0524	idnO		gluconate 5-dehydrogenase	NE
SP5448_RS06685		0.4029	0.7359		2.865	0.01369		-1.563	0.1897		1327054	1327491	+	WP_010922041.1		M5005_Spy_0523			hypothetical protein	NE
SP5448_RS06690		-0.5033	0.6732		-1.684	0.1521		0.9819	0.4022		1327491	1328690	+	WP_010922040.1		M5005_Spy_0522			unsaturated glucuronyl hydrolase	NE
SP5448_RS06695		-0.4883	0.5372		-1.103	0.1648		0.8976	0.3071		1328726	1329214	+	WP_010922039.1		M5005_Spy_0521	agaV		PTS system, N-acetylgalactosamine-specific IIB	NE
SP5448_RS06700		0.4026	0.6802		1.231	0.202		0.03154	0.9757		1329233	1330015	+	WP_010922038.1		M5005_Spy_0520	agaS		PTS system, N-acetylgalactosamine-specific IIC	NE
SP5448_RS06705		0.2725	0.6799		-0.586	0.3807		1.22	0.1107		1330002	1330823	+	WP_011285454.1		M5005_Spy_0519	agaD		PTS system, N-acetylgalactosamine-specific IID	NE
SP5448_RS06710		0.7418	0.4657		0.6715	0.5027		0.5225	0.6199		1330910	1332817	+	WP_010922036.1		M5005_Spy_0518			oligohyaluronate lyase	NE
SP5448_RS06715		1.054	0.3137		1.789	0.08279		-2.002	0.07246		1332881	1333876	+	WP_010922035.1		M5005_Spy_0517	regR		transcriptional regulator, LacI family	NE
SP5448_RS06720		0.3322	0.77		0.5346	0.6418		0.9021	0.4091		1333960	1336641	-	WP_010922034.1		M5005_Spy_0516	pacL, caxP		calcium-transporting ATPase; CaxP-homolog (S. pneumo)	E
SP5448_RS06725		-0.4411	0.6977		-0.4351	0.6978		-2.066	0.08224		1336872	1337258	-	WP_002985505.1		M5005_Spy_0515			hypothetical cytosolic protein	NE
SP5448_RS06730		0.2481	0.7534		-0.1211	0.8782		0.3496	0.6837		1337340	1338641	+	WP_002985509.1		M5005_Spy_0514			dGTP triphosphohydrolase	NE
SP5448_RS06735		0.4519	0.7326		0.1954	0.8802		-0.3	0.8098		1338713	1338946	+	WP_002985511.1		M5005_Spy_0513			hypothetical cytosolic protein	NC
SP5448_RS06740		0.1694	0.885		-1.635	0.1601		-2.748	0.02271		1339097	1339906	+	WP_002985513.1		M5005_Spy_0512			hydrolase, HAD superfamily	NE
SP5448_RS06745		-0.3234	0.7917		-0.2186	0.8583		1.583	0.1746		1339906	1341132	+	WP_010922033.1		M5005_Spy_0511	murM		UDP-N-acetylmuramoylpentapeptide-lysine N(6)-alanyltransferase/UDP-N-acetylmuramoylpentapeptide-lysine N(6)-seryltransferase	E
SP5448_RS06750		0.2474	0.8516		2.517	0.05049		0.3081	0.8063		1341119	1342354	+	WP_010922032.1		M5005_Spy_0510			factor essential for expression of methicillin resistance	E
SP5448_RS06755		0	1		0	1		0	1		1342453	1343211	-	WP_002990539.1		M5005_Spy_0509	tpi		triosephosphate isomerase	C
SP5448_RS06760		0	1		0	1		2.075	0.06118		1343452	1344648	-	WP_010922031.1		M5005_Spy_0508			protein translation elongation factor Tu	E
SP5448_RS06765		1.493	0.1293		1.424	0.1429		1.265	0.2175		1345002	1346276	-	WP_002990545.1		M5005_Spy_0506	ftsW		cell division protein	E
SP5448_RS06770		0.09241	0.9273		-0.5842	0.5582		-2.164	0.03923		1346446	1349208	-	WP_015055932.1		M5005_Spy_0505	ppc		phosphoenolpyruvate carboxylase	NE
SP5448_RS06775		-0.238	0.6718		-0.8955	0.1162		0.02516	0.9683		1349403	1351202	+	WP_010922029.1		M5005_Spy_0504	pepF		oligoendopeptidase F	NE
SP5448_RS06780		0.731	0.5203		-0.1458	0.8958		3.878	0.0006722		1351195	1351674	+	WP_010922028.1		M5005_Spy_0503			glutathione peroxidase	NE
SP5448_RS06785		-0.3189	0.7752		1.185	0.2817		-0.09501	0.9338		1351720	1352106	-	WP_010922027.1		M5005_Spy_0502			hypothetical protein	NE
SP5448_RS06790		0.4283	0.6413		-0.1979	0.8286		-2.076	0.03702		1352090	1352593	-	WP_010922026.1		M5005_Spy_0501			integral membrane protein	NE
SP5448_RS06795		-0.7313	0.541		-0.7381	0.5387		0.04356	0.9695		1352918	1353766	+	WP_010922025.1		M5005_Spy_0500			N-acetylmuramoyl-L-alanine amidase	C
SP5448_RS06800		-0.9853	0.4045		-2.776	0.01855		-2.294	0.05596		1354035	1354598	+	WP_011285452.1		M5005_Spy_0499			thiamine transporter	NE
SP5448_RS06805		-0.1104	0.909		-1.856	0.05463		-1.763	0.09008		1354689	1355168	+	WP_002990557.1		M5005_Spy_0498			transcriptional regulator	NE
SP5448_RS06810		0.6371	0.3658		1.505	0.03372		-1.048	0.1781		1355509	1356132	+	WP_009880881.1		M5005_Spy_0497			phosphoglycerate mutase	NE
SP5448_RS06815		-0.3248	0.7647		0.1228	0.9085		-1.783	0.1158		1356240	1357142	-	WP_011284617.1		M5005_Spy_0496			hydrolase, HAD superfamily	NE
SP5448_RS06820		-0.5441	0.4922		-0.1294	0.8702		-0.4607	0.5919		1357316	1358809	+	WP_010922023.1		M5005_Spy_0495	lysS		lysyl-tRNA synthetase	E
SP5448_RS06830		0.1032	0.9125		0.1806	0.8462		1.831	0.06511		1359182	1359394	-	WP_002985548.1		M5005_Spy_0493			hypothetical cytosolic protein	NE
SP5448_RS06835		0.9523	0.3899		0.9301	0.3954		-1.52	0.1872		1359604	1360890	-	WP_011285450.1		M5005_Spy_0491			peptidase family U32	NE
SP5448_RS06840		-1.549	0.2073		-2.06	0.08807		1.002	0.3997		1360981	1361907	-	WP_002990568.1		M5005_Spy_0489			peptidase family U32	NE
SP5448_RS06845		0.1085	0.9238		0.03086	0.9785		0.2867	0.7929		1362106	1362390	+	WP_010922021.1		M5005_Spy_0488			hypothetical protein	NE
SP5448_RS06850		-0.6541	0.5841		-0.9083	0.4395		-2.788	0.0217		1362549	1362977	-	WP_002990572.1		M5005_Spy_0487			hypothetical protein	NE
SP5448_RS06855		-0.5223	0.5304		-2.71	0.001413		-3.568	0.0003691		1362970	1363377	-	WP_002985561.1		M5005_Spy_0486			hypothetical protein	NE
SP5448_RS06860		-0.1209	0.9182		-1.467	0.2068		1.166	0.316		1363399	1364178	-	WP_002990577.1		M5005_Spy_0485	lgt		prolipoprotein diacylglyceryl transferase	NE
SP5448_RS06865		0	1		0	1		0	1		1364175	1365107	-	WP_002990580.1		M5005_Spy_0484	ptsK		hpr(ser) kinase	E
SP5448_RS06870		-0.4387	0.7388		-0.4513	0.7275		-1.053	0.3923		1365472	1365744	-	WP_002985568.1		M5005_Spy_0483			stress-responsive transcriptional regulator	NE
SP5448_RS06875		-0.1318	0.9077		1.128	0.3095		-0.6859	0.5482		1365808	1366245	-	WP_015055931.1		M5005_Spy_0482			zinc metalloprotease	NE
SP5448_RS06880		0.4198	0.5418		0.6251	0.3672		0.08584	0.9101		1366232	1368364	-	WP_002991935.1		M5005_Spy_0481			hypothetical membrane associated protein	NC
SP5448_RS06885		0.09619	0.9313		-0.6388	0.5602		0.7893	0.4836		1368598	1368753	+	WP_002985576.1		M5005_Spy_0479			hypothetical membrane spanning protein	NE
SP5448_RS06890		0.8815	0.1839		-0.9005	0.1785		-3.271	8.589e-06		1368901	1369803	+	WP_002990594.1		M5005_Spy_0478	scfA		hyp. 8-TM membrane protein; subcut. fitness gene A	NE
SP5448_RS06895		-0.2892	0.7813		-2.108	0.04123		-1.401	0.1953		1369803	1370618	+	WP_010922018.1		M5005_Spy_0477	scfB		hyp. 2-TM membrane protein; subcut. fitness gene B	NE
SP5448_RS06900		0.5645	0.5541		0.6959	0.4609		2.202	0.02786		1370717	1372141	-	WP_010922017.1		M5005_Spy_0476	bglA		6-phospho-beta-glucosidase	NE
SP5448_RS06905		-0.4341	0.6703		-0.7616	0.4506		0.8994	0.3966		1372160	1374022	-	WP_010922016.1		M5005_Spy_0475			PTS system, b-Glucoside-specific IIABC	NE
SP5448_RS06910		-0.1685	0.8663		-0.09476	0.9236		0.4055	0.6979		1374024	1374866	-	WP_011285444.1		M5005_Spy_0474	licT		transcription antiterminator, BglG family	NE
SP5448_RS06915		-0.12	0.8807		0.6864	0.3907		0.2678	0.7572		1375194	1376561	+	WP_010922014.1		M5005_Spy_0473			multidrug resistance protein B	NE
SP5448_RS06920		-1.146	0.3859		-0.7114	0.5837		-1.52	0.2201		1376615	1378165	-	WP_010922013.1		M5005_Spy_0472	ftsY		cell division protein	E
SP5448_RS06930		-0.3506	0.7769		-0.165	0.8919		-0.1613	0.8936		1378993	1379790	-	WP_010922011.1		M5005_Spy_0470			hydrolase, HAD superfamily	NE
SP5448_RS06935		-0.4532	0.6768		-0.0704	0.9477		-0.6047	0.5971		1380095	1380370	+	WP_011285442.1		M5005_Spy_0468			transposase	NE
SP5448_RS06940		0.4796	0.5074		-0.1078	0.8824		1.571	0.05548		1380418	1381131	+	WP_011285441.1		M5005_Spy_0467			transposase	NE
SP5448_RS06945		-0.4433	0.6552		-0.6341	0.5215		1.47	0.161		1381584	1382483	-	WP_011285440.1		M5005_Spy_0466			hypothetical protein	NE
SP5448_RS06950		-0.1874	0.8872		-0.2575	0.8428		-0.2999	0.8087		1382603	1382803	-	WP_011017514.1		M5005_Spy_0465			hypothetical protein	NE
SP5448_RS06955		-0.0867	0.9319		-1.904	0.05969		-0.07511	0.9436		1382816	1383784	-	WP_042361481.1		M5005_Spy_0464	mccF		microcin C7 self-immunity protein	NE
SP5448_RS06960		-0.2043	0.7438		-0.05219	0.9342		0.04264	0.9512		1383760	1385007	-	WP_011285438.1		M5005_Spy_0463			hypothetical cytosolic protein	NE
SP5448_RS06965		-0.08792	0.8887		0.239	0.7067		1.162	0.09689		1385021	1385845	-	WP_010922009.1		M5005_Spy_0462			hypothetical protein	NE
SP5448_RS06970		0.6437	0.5164		0.9226	0.3471		-1.124	0.2869		1385869	1386207	-	WP_011285437.1		M5005_Spy_0461			hypothetical cytosolic protein	NE
SP5448_RS06975		-0.4556	0.7305		-1.204	0.354		-1.3	0.2942		1386624	1386938	-	WP_011285436.1		M5005_Spy_0460			hypothetical protein	NE
SP5448_RS06980		0.4994	0.671		0.06483	0.9554		-1.841	0.1276		1387004	1387456	-	WP_010922006.1		M5005_Spy_0459			portal protein	NE
SP5448_RS06985		0.9662	0.2963		1.185	0.1972		-0.9069	0.363		1387561	1387833	-	WP_010922005.1		M5005_Spy_0458			hypothetical cytosolic protein	NE
SP5448_RS06990		0.7307	0.4954		-1.549	0.1496		-2.832	0.01522		1387852	1388157	-	WP_011285435.1		M5005_Spy_0457			plasmid stabilization system protein	NE
SP5448_RS06995		1.986	0.07186		0.2372	0.8291		-0.3702	0.7493		1388157	1388459	-	WP_002991611.1		M5005_Spy_0456			plasmid stabilization system antitoxin protein	NC
SP5448_RS07000		0.941	0.1553		0.7283	0.2757		1.167	0.1118		1388505	1389599	+	WP_010922002.1		M5005_Spy_0455			hypothetical protein	NE
SP5448_RS07005		0.7775	0.5365		-0.1219	0.9214		0.4622	0.704		1389599	1389823	+	WP_010922001.1		M5005_Spy_0454			hypothetical protein	NE
SP5448_RS07015		0.5044	0.6289		0.3107	0.7621		1.433	0.1817		1391462	1391671	+	WP_002985621.1		M5005_Spy_0451			transcriptional regulator	NE
SP5448_RS07020		1.1	0.1509		0.8715	0.2563		2.091	0.01222		1391774	1392982	-	WP_010921998.1		M5005_Spy_0450	mefE		macrolide-efflux protein	NE
SP5448_RS07025		0.4039	0.6625		0.2982	0.7457		1.6	0.1048		1393067	1394224	-	WP_011285434.1		M5005_Spy_0449	hasB.2		UDP-glucose 6-dehydrogenase; HasB.2, capsule synthesis	NE
SP5448_RS07030		0.3758	0.611		0.3555	0.6318		0.9528	0.239		1394917	1395906	-	WP_010921996.1		M5005_Spy_0447			glycosyltransferase involved in cell wall biogenesis	NE
SP5448_RS07035		0.6763	0.4426		0.5904	0.5018		1.225	0.2003		1395961	1396923	-	WP_032459861.1		M5005_Spy_0446			hypothetical membrane associated protein	NE
SP5448_RS07040		0.1948	0.8482		1.004	0.3163		0.9766	0.3537		1396913	1398112	-	WP_002985626.1		M5005_Spy_0445	metK1		S-adenosylmethionine synthetase	NE
SP5448_RS07045		0.5513	0.6405		-0.04762	0.9673		1.75	0.1333		1398122	1399108	-	WP_010921994.1		M5005_Spy_0444			hypothetical protein	NE
SP5448_RS07050		0.9892	0.322		0.6796	0.4907		1.937	0.06251		1399101	1399835	-	WP_010921993.1		M5005_Spy_0443			hypothetical protein	NE
SP5448_RS07055		-0.6797	0.5698		-0.5629	0.6321		0.9357	0.4262		1399837	1400673	-	WP_002985631.1		M5005_Spy_0442			hypothetical cytosolic protein	NE
SP5448_RS07060		-0.6203	0.54		-1.448	0.1517		-2.633	0.01727		1400670	1401596	-	WP_020750165.1		M5005_Spy_0441	aroE.2		shikimate 5-dehydrogenase	NE
SP5448_RS07065		-0.1105	0.8915		-0.7962	0.3257		1.671	0.05694		1401816	1402667	+	WP_002985634.1		M5005_Spy_0440			transcriptional regulator	NE
SP5448_RS07070		-0.1611	0.7745		-0.9027	0.114		-0.9423	0.1396		1402920	1406459	-	WP_010921991.1		M5005_Spy_0439	smc		chromosome partition protein	NE
SP5448_RS07075		0	1		0	1		0	1		1406460	1407152	-	WP_002990670.1		M5005_Spy_0438	acpA		ribonuclease III; RncS B. subtilis	C
SP5448_RS07080		-0.7622	0.4945		-1.07	0.3275		0.4444	0.6931		1407596	1408405	-	WP_002985641.1		M5005_Spy_0437	vicX		Zn-dependent hydrolase	NE
SP5448_RS07085		-0.6542	0.5106		-3	0.002326		-2.844	0.006441		1408409	1409761	-	WP_002995609.1		M5005_Spy_0436	vicK		TCS-3 sensor histidine kinase VicK (PAS domain)	NE
SP5448_RS07090		0	1		0	1		0	1		1409754	1410464	-	WP_002985645.1		M5005_Spy_0435	vicR		TCS-3 response regulator VicR	E
SP5448_RS07095		-0.6161	0.5908		0.4012	0.7199		-0.2328	0.8392		1410626	1411621	-	WP_010921990.1		M5005_Spy_0434			hypothetical cytosolic protein	NE
SP5448_RS07100		0.05523	0.9555		-0.6281	0.5205		1.217	0.2384		1411716	1412963	-	WP_010921989.1		M5005_Spy_0433			long-chain-fatty-acid--CoA ligase	NE
SP5448_RS07105		0.1307	0.8938		0.5155	0.5942		1.646	0.108		1412920	1414068	-	WP_010921988.1		M5005_Spy_0432			acetyl-CoA acetyltransferase	NE
SP5448_RS07110		0.4538	0.6982		1.249	0.2775		0.1364	0.9085		1414463	1414612	-	WP_011285429.1		M5005_Spy_0431			dihydroxyacetone kinase	NC
SP5448_RS07115		0.06674	0.9458		-0.2642	0.7856		0.2719	0.7918		1414813	1415598	-	WP_011285428.1		M5005_Spy_0430			ABC transporter permease protein	NE
SP5448_RS07120		-0.143	0.8961		-0.5084	0.6374		1.24	0.2651		1415600	1416418	-	WP_010921986.1		M5005_Spy_0429			daunorubicin resistance transmembrane protein	NE
SP5448_RS07125		-0.6151	0.4543		-0.008423	0.9918		0.3594	0.6879		1416420	1417412	-	WP_011285427.1		M5005_Spy_0428	drrA		daunorubicin resistance ATP-binding protein	NE
SP5448_RS07130		0.4516	0.7329		-0.12	0.9264		0.0394	0.9747		1417553	1419496	-	WP_010921984.1		M5005_Spy_0427	thrS		threonyl-tRNA synthetase	E
SP5448_RS07135		0.3662	0.7812		0.04037	0.9752		-0.0003101	0.9998		1419918	1421252	-	WP_002994187.1		M5005_Spy_0426			1,2-diacylglycerol 3-glucosyltransferase	E
SP5448_RS07140		0.2322	0.8375		0	1		0	1		1421254	1422252	-	WP_002985678.1		M5005_Spy_0425			glycosyltransferase	C
SP5448_RS07145		-0.6484	0.6239		-1.072	0.4092		-0.3407	0.7838		1422383	1423384	-	WP_002985680.1		M5005_Spy_0424	ccpA		catabolite control protein A	NC
SP5448_RS07150		-0.5958	0.5762		-0.4473	0.672		-0.8055	0.4725		1423558	1424643	+	WP_002985682.1		M5005_Spy_0423	pepQ		Xaa-Pro dipeptidase	NE
SP5448_RS07155		-0.7028	0.3557		-0.04608	0.9519		-1.565	0.07669		1424692	1425357	+	WP_010921982.1		M5005_Spy_0422			NAD(P)H-dependent quinone reductase	NE
SP5448_RS07160		-1.281	0.2087		-1.264	0.2118		-0.843	0.4355		1425368	1425745	+	WP_002985686.1		M5005_Spy_0421	gloA		lactoylglutathione lyase	NE
SP5448_RS07165		-0.5536	0.5794		0.3504	0.722		0.1555	0.8809		1425890	1426816	+	WP_002994177.1		M5005_Spy_0420			glucosyltransferase	NE
SP5448_RS07170		-0.8999	0.464		-0.9584	0.4268		0.06088	0.9596		1427027	1427710	+	WP_002990714.1		M5005_Spy_0419			permease	NE
SP5448_RS07175		-0.4882	0.6218		-0.7824	0.4233		-0.03353	0.9741		1427710	1428636	+	WP_002985692.1		M5005_Spy_0418			permease	NE
SP5448_RS07180		-0.1518	0.902		-1.256	0.3023		-1.796	0.1431		1428686	1429333	+	WP_002994169.1		M5005_Spy_0417	pcp		pyrrolidone-carboxylate peptidase	NE
SP5448_RS07185		0.3291	0.7152		0.03631	0.9678		0.003542	0.9971		1429449	1430159	-	WP_002994155.1		M5005_Spy_0416			glutaminyl-peptide cyclotransferase	NE
SP5448_RS07190		-0.329	0.782		-0.2869	0.8101		0.84	0.4594		1430174	1430641	-	WP_002994152.1		M5005_Spy_0415			ssrA-binding protein	NC
SP5448_RS07195		0.3428	0.7358		-1.775	0.07704		-1.155	0.2745		1430644	1432974	-	WP_011285426.1		M5005_Spy_0414			exoribonuclease II	NE
SP5448_RS07200		0	1		0	1		0	1		1433071	1433307	-	WP_002985700.1		M5005_Spy_0413	secG		protein translocase subunit	E
SP5448_RS07205		0.9742	0.206		1.623	0.03547		0.9049	0.2805		1433496	1434617	-	WP_032459864.1		M5005_Spy_0411			multidrug resistance protein B	NE
SP5448_RS07210		0.5833	0.5225		0.5112	0.5738		1.176	0.232		1434811	1436313	-	WP_010921977.1		M5005_Spy_0410			ATPase	NE
SP5448_RS07215		0	1		1.329	0.2511		0	1		1436503	1437096	-	WP_010921976.1		M5005_Spy_0409			dephospho-CoA kinase	E
SP5448_RS07220		-0.4038	0.7376		-0.8592	0.4691		-0.8168	0.4979		1437093	1437920	-	WP_010921975.1		M5005_Spy_0408	fpg		formamidopyrimidine-DNA glycosylase	NE
SP5448_RS07225		-0.1161	0.8856		-0.5596	0.4886		2.476	0.00521		1438092	1438958	-	WP_002990747.1		M5005_Spy_0407	mutR		transcriptional regulator	NE
SP5448_RS07230		-0.2334	0.8208		-0.3129	0.7598		-0.6338	0.5628		1439265	1439507	+	WP_011285423.1		M5005_Spy_0406			hypothetical protein	NE
SP5448_RS07235		-1.108	0.2842		-0.964	0.3472		-1.948	0.08468		1440029	1440298	+	WP_010921974.1		M5005_Spy_0404			hypothetical protein	NE
SP5448_RS07240		-0.4759	0.6585		-1.343	0.2107		-2.573	0.0273		1440646	1441044	-	WP_014635342.1		M5005_Spy_0403			hypothetical protein	NE
SP5448_RS07245		-0.2657	0.7098		0.2844	0.692		-0.6278	0.4243		1441137	1442132	-	WP_010921973.1		M5005_Spy_0402			hypothetical protein	NE
SP5448_RS07250		-0.004093	0.9973		-0.4966	0.6742		2.079	0.08106		1442625	1442819	-	WP_002990768.1		M5005_Spy_0400	silD		hypothetical protein	NE
SP5448_RS07255		-0.3263	0.7913		-0.6932	0.5674		-1.647	0.1793		1443113	1443313	-	WP_010921972.1		M5005_Spy_0399			hypothetical membrane associated protein	NE
SP5448_RS07270		0.4161	0.6332		-1.526	0.0852		-1.834	0.07262		1444737	1444919	-	WP_002987564.1		M5005_Spy_0394			hypothetical protein	NE
SP5448_RS07275		1.456	0.1045		1.373	0.1239		1.513	0.1158		1444934	1445179	-	WP_002994504.1		M5005_Spy_0393			hypothetical protein	NE
SP5448_RS07280		-0.1903	0.8787		-1.672	0.1745		-0.9841	0.4219		1446136	1446612	-	WP_010921970.1		M5005_Spy_0391			phosphohydrolase	NE
SP5448_RS07285		1.016	0.3735		0	1		0	1		1446632	1447528	-	WP_010921969.1		M5005_Spy_0390	era		GTP-binding protein homolog	C
SP5448_RS07290		0	1		0	1		0	1		1447648	1448055	-	WP_002985746.1		M5005_Spy_0389	dgk		diacylglycerol kinase	E
SP5448_RS07295		-0.1731	0.8784		0.007186	0.995		0.2687	0.8056		1448036	1448533	-	WP_002985748.1		M5005_Spy_0388			hypothetical metal-binding protein	E
SP5448_RS07300		-0.3444	0.6839		-0.9249	0.2734		0.4235	0.6439		1448692	1449267	-	WP_010921968.1		M5005_Spy_0387			uracil DNA glycosylase superfamily protein	NE
SP5448_RS07305		-0.135	0.877		-0.3786	0.6631		0.03237	0.9726		1449313	1450365	-	WP_010921967.1		M5005_Spy_0386	phoH		phoH protein	NE
SP5448_RS07310		-0.3597	0.6496		-0.02382	0.976		-0.2267	0.7917		1450524	1452296	-	WP_010921966.1		M5005_Spy_0385			67 kDa Myosin-crossreactive antigen	NE
SP5448_RS07315		0.4599	0.6723		-0.7304	0.4987		-0.7961	0.4817		1452610	1453779	-	WP_010921965.1		M5005_Spy_0384			surface antigen	NE
SP5448_RS07320		0.365	0.78		-0.9373	0.4665		-0.7715	0.5273		1453935	1454150	-	WP_002985757.1		M5005_Spy_0383			D-alanyl-D-alanine carboxypeptidase	NE
SP5448_RS07325		0.6534	0.475		1.066	0.2409		0.6554	0.5074		1454147	1454656	-	WP_010921964.1		M5005_Spy_0382	msrA.2		peptide methionine sulfoxide reductase	NE
SP5448_RS07330		-0.08727	0.9209		0.9167	0.2945		1.862	0.04732		1454729	1455586	-	WP_010921963.1		M5005_Spy_0381			s1 RNA binding domain	NE
SP5448_RS07335		0	1		0	1		0	1		1455695	1456252	-	WP_002985763.1		M5005_Spy_0380	rrf		ribosome recycling factor	E
SP5448_RS07340		-0.6705	0.5992		0.6628	0.602		-0.401	0.7392		1456281	1457009	-	WP_002985765.1		M5005_Spy_0377			uridylate kinase	E
SP5448_RS07345		0	1		0	1		0	1		1457332	1458021	-	WP_002985768.1		M5005_Spy_0375	rplA		LSU ribosomal protein L1P	E
SP5448_RS07350		0	1		0	1		0	1		1458127	1458552	-	WP_002990800.1		M5005_Spy_0374	rplK		LSU ribosomal protein L11P	NC
SP5448_RS07355		0.1817	0.8902		-1.38	0.286		-1.293	0.2997		1458796	1459149	+	WP_010921962.1		M5005_Spy_0373			integral membrane protein	NE
SP5448_RS07360		0.05351	0.9677		-0.2271	0.8612		-0.1833	0.8828		1459219	1461624	-	WP_011285414.1		M5005_Spy_0372	ftsK		cell division protein	E
SP5448_RS07365		0.6494	0.578		-0.5003	0.6639		-0.6147	0.599		1461841	1462647	+	WP_002990808.1		M5005_Spy_0371			peptidyl-prolyl cis-trans isomerase	NE
SP5448_RS07370		-0.7237	0.5321		-0.4149	0.7161		-1.506	0.1985		1462795	1463649	-	WP_002990814.1		M5005_Spy_0370	mtsC		manganese transport system membrane protein	NE
SP5448_RS07375		-1.726	0.07914		-1.816	0.06367		-2.47	0.02521		1463650	1464375	-	WP_002985780.1		M5005_Spy_0369	mtsB		manganese transport system ATP-binding protein	NE
SP5448_RS07380		-2.185	0.02089		-0.4369	0.6403		-2.256	0.02841		1464439	1465371	-	WP_004218965.1		M5005_Spy_0368	mtsA		manganese-binding protein	NE
SP5448_RS07385		-0.1306	0.9064		-1.238	0.2631		-0.94	0.4161		1465517	1466164	+	WP_011285412.1		M5005_Spy_0367	mtsR		iron-dependent repressor; Fe and Mn; regulator of Mga	NC
SP5448_RS07390		1.01	0.1702		1.297	0.07992		3.312	6.918e-05		1466265	1466606	-	WP_010921958.1		M5005_Spy_0366			hypothetical protein	NE
SP5448_RS07395		0.2322	0.8375		0	1		0	1		1466757	1467452	-	WP_010921957.1		M5005_Spy_0365	pfs		5'-methylthioadenosine nucleosidase/S-adenosylhomocysteine nucleosidase	E
SP5448_RS07400		1.787	0.09597		-1.596	0.1394		-1.877	0.1015		1467472	1467723	-	WP_010921956.1		M5005_Spy_0364			hypothetical membrane associated protein	NC
SP5448_RS07405		-0.2092	0.8579		-0.3111	0.7868		2.658	0.02125		1467723	1468277	-	WP_010921955.1		M5005_Spy_0363			phosphohydrolase	NE
SP5448_RS07410		-0.114	0.9311		-0.3797	0.7697		-0.7604	0.5375		1468308	1469690	-	WP_010921954.1		M5005_Spy_0362	gcaD		glucosamine-1-phosphate acetyltransferase/UDP-N-acetylglucosamine pyrophosphorylase	E
SP5448_RS07415		0.07982	0.9135		0.1548	0.8338		0.4121	0.6091		1469863	1471200	-	WP_010921953.1		M5005_Spy_0361			phosphoglycerate transporter protein	NE
SP5448_RS07420		0.113	0.9067		0.5945	0.5329		0.8746	0.3864		1471533	1472492	-	WP_010921952.1		M5005_Spy_0360			NAD-dependent oxidoreductase	NE
SP5448_RS07425		0.3525	0.7096		-1.425	0.138		-0.7279	0.491		1472568	1473266	-	WP_010921951.1		M5005_Spy_0359			short chain dehydrogenase	NE
SP5448_RS07430		0.4786	0.6688		-0.1863	0.8666		-1.822	0.1245		1473259	1473495	-	WP_002990844.1		M5005_Spy_0358			hypothetical protein	NE
SP5448_RS07435		0.6175	0.5597		3.514	0.0007065		0.5871	0.5918		1473856	1474470	+	WP_010921950.1		M5005_Spy_0357			hypothetical protein	NE
SP5448_RS07440		0.1224	0.8909		-0.1852	0.8349		1.207	0.2083		1474718	1475416	+	WP_010921949.1		M5005_Spy_0356	speJ		exotoxin type J precursor	NE
SP5448_RS07445		-0.06154	0.9578		0.625	0.5848		0.1457	0.9014		1475729	1476049	-	WP_002993880.1		M5005_Spy_0355			hypothetical protein	NE
SP5448_RS07450		-0.128	0.8941		0.3219	0.7353		-0.4073	0.6904		1476728	1477360	+	WP_010921948.1		M5005_Spy_0354			hypothetical protein	NE
SP5448_RS07455		0.2464	0.7817		1.361	0.1243		-2.117	0.03362		1477454	1477705	-	WP_010921947.1		M5005_Spy_0353			hypothetical membrane spanning protein	NE
SP5448_RS07460		1.259	0.2863		0.867	0.4559		1.168	0.32		1477979	1478533	-	WP_010921945.1		M5005_Spy_0352			hypothetical membrane associated protein	NE
SP5448_RS07465		0.7592	0.4547		0.3381	0.7359		0.9508	0.3676		1478974	1479726	+	WP_010921944.1		M5005_Spy_0351	spyA		c3 family ADP-ribosyltransferase	NE
SP5448_RS07470		-0.1082	0.9211		-1.918	0.07681		-1.196	0.285		1479929	1482109	-	WP_010921943.1		M5005_Spy_0349	nrdE.1		ribonucleoside-diphosphate reductase alpha chain	NE
SP5448_RS07475		0.1289	0.9062		-1.634	0.1376		-0.7944	0.4903		1482076	1482564	-	WP_010921942.1		M5005_Spy_0348	nrdI		hypothetical protein	NE
SP5448_RS07480		-0.2086	0.834		-2.525	0.01065		-0.7352	0.4815		1482568	1483581	-	WP_010921941.1		M5005_Spy_0347	nrdF.1		ribonucleoside-diphosphate reductase beta chain	NE
SP5448_RS07485		-0.5675	0.6205		-0.3099	0.789		-0.2878	0.7936		1484076	1486073	-	WP_011285406.1		M5005_Spy_0345	metS		methionyl-tRNA synthetase	E
SP5448_RS07490		0.244	0.7779		0.2426	0.7786		1.059	0.2586		1486316	1487023	-	WP_010921939.1		M5005_Spy_0344			permease	NE
SP5448_RS07495		0.2921	0.7704		-2.008	0.04673		-2.433	0.02767		1487348	1487539	+	WP_027968793.1
SP5448_RS07500		0.4399	0.5325		1.044	0.141		0.7235	0.351		1487794	1492737	-	WP_011285404.1		M5005_Spy_0341	spyCEP		lactocepin; SpyCEP; IL-8 protease?	NE
SP5448_RS07505		0.2738	0.6588		0.3919	0.5322		0.2083	0.7633		1493000	1494181	-	WP_011285403.1		M5005_Spy_0340	lctO		L-lactate oxidase	NE
SP5448_RS07510		-0.2862	0.8219		-0.674	0.5931		-0.6453	0.5886		1494270	1494437	-	WP_002985827.1
SP5448_RS07515		-1.106	0.3369		-0.8568	0.4501		-2.713	0.02255		1494415	1495242	+	WP_010921936.1		M5005_Spy_0339	exoA		exodeoxyribonuclease III	NC
SP5448_RS07520		0.3368	0.7015		-0.111	0.8989		0.7619	0.4162		1495316	1495672	-	WP_011284536.1		M5005_Spy_0338			arsenate reductase family protein	NE
SP5448_RS07525		0.5938	0.5203		-0.03066	0.9735		-0.8839	0.3896		1495970	1496599	+	WP_010921934.1		M5005_Spy_0337	cutC		copper homeostasis protein	NE
SP5448_RS07530		-0.6119	0.5538		-0.6338	0.5369		-1.819	0.1077		1496646	1497038	-	WP_002985833.1		M5005_Spy_0336			hypothetical membrane associated protein	NE
SP5448_RS07535		-0.3367	0.7298		0.2136	0.8246		-1.327	0.1964		1497065	1497928	-	WP_010921933.1		M5005_Spy_0335			corrin/porphyrin methyltransferase	NE
SP5448_RS07540		0.2322	0.8375		0	1		0	1		1497933	1498256	-	WP_002985838.1		M5005_Spy_0334			hypothetical protein	NC
SP5448_RS09125		0.9515	0.1792		0.9593	0.1785		4.184	1.256e-07		1498661	1498900	-	WP_010921932.1		M5005_Spy_0332			tpl protein	NE
SP5448_RS07550		0.4582	0.6896		0.08694	0.9401		0.7793	0.4784		1498919	1499794	-	WP_010921931.1		M5005_Spy_0331	dnaX		DNA polymerase III, delta' subunit	E
SP5448_RS07555		0.3996	0.7254		0.895	0.437		0	1		1499812	1500447	-	WP_010921930.1		M5005_Spy_0330	tmk		thymidylate kinase	E
SP5448_RS07560		1.153	0.1712		-0.9089	0.2856		-2.72	0.00689		1500696	1500971	-	WP_002985847.1		M5005_Spy_0329			hypothetical cytosolic protein	NE
SP5448_RS07565		-0.09251	0.9355		0.2068	0.858		0.09191	0.9333		1501463	1502053	-	WP_002985850.1		M5005_Spy_0328	clpP		ATP-dependent Clp protease proteolytic subunit	C
SP5448_RS07570		-0.6938	0.5566		-1.635	0.1609		-2.885	0.01672		1502277	1502906	-	WP_002985854.1		M5005_Spy_0327	upp		uracil phosphoribosyltransferase	NE
SP5448_RS07575		-0.3009	0.8054		-0.3511	0.7737		-0.5307	0.6457		1503074	1504708	-	WP_002985856.1		M5005_Spy_0326			export protein for polysaccharides and teichoic acids	E
SP5448_RS07580		-0.08785	0.9391		-0.1558	0.8931		-0.1302	0.9058		1504796	1506241	+	WP_010921928.1		M5005_Spy_0325	murE		UDP-N-acetylmuramoyl-L-alanyl-D-glutamate--lysine ligase	E
SP5448_RS07585		1.013	0.3178		-0.403	0.69		0.6693	0.5294		1506487	1507269	+	WP_002985861.1		M5005_Spy_0324	fhuA		ferrichrome transport ATP-binding protein	NE
SP5448_RS07590		-0.03409	0.9676		-0.09988	0.9052		-0.1858	0.8417		1507295	1508227	+	WP_010921927.1		M5005_Spy_0323	fhuD		ferrichrome-binding protein	NE
SP5448_RS07595		-0.9064	0.3213		0.2062	0.82		-0.4584	0.6357		1508238	1509269	+	WP_011106886.1		M5005_Spy_0322	fhuB		ferrichrome transport system permease protein	NE
SP5448_RS07600		-0.3511	0.6343		-0.9843	0.1846		1.421	0.08231		1509230	1510267	+	WP_020750157.1		M5005_Spy_0321	fhuG		ferrichrome transport system permease protein	NE
SP5448_RS07605		0.4902	0.6128		1.073	0.2623		1.308	0.1971		1510312	1510965	-	WP_010921924.1		M5005_Spy_0320			hypothetical cytosolic protein	NE
SP5448_RS07610		0	1		0.4013	0.7258		0	1		1511041	1511976	-	WP_002990948.1		M5005_Spy_0319	ppaC		manganese-dependent inorganic pyrophosphatase	NC
SP5448_RS07615		-0.02101	0.9823		-0.4669	0.6191		0.03369	0.9731		1512107	1512898	-	WP_010921923.1		M5005_Spy_0318	pflC		pyruvate formate-lyase activating enzyme	NE
SP5448_RS07620		1.606	0.08051		1.261	0.1664		1.187	0.2218		1512976	1514310	-	WP_002990953.1		M5005_Spy_0317	hlyX		putative hemolysin	NE
SP5448_RS07625		0.7007	0.4948		-0.4747	0.6421		-0.2229	0.8361		1514443	1514997	-	WP_010921921.1		M5005_Spy_0316			SAM-dependent methyltransferase	NE
SP5448_RS07630		0.3187	0.7843		-0.6603	0.5635		1.369	0.2367		1515036	1515956	-	WP_002990957.1		M5005_Spy_0315			Fe-S oxidoreductase	NE
SP5448_RS07635		-0.07025	0.9376		0.4223	0.6368		-2.683	0.009038		1516249	1516899	-	WP_015055917.1		M5005_Spy_0314			phosphatidylglycerophosphatase B homolog	NE
SP5448_RS07640		0.0717	0.9501		0.01097	0.9924		0.03576	0.974		1516904	1517467	-	WP_002990963.1		M5005_Spy_0313			riboflavin transporter	C
SP5448_RS07645		-0.493	0.5659		-0.7977	0.3517		2.136	0.02123		1517778	1518326	-	WP_002990965.1		M5005_Spy_0312			23S rRNA methyltransferase	NE
SP5448_RS07650		-0.677	0.5746		-0.07002	0.9527		0.8687	0.4645		1518504	1518767	-	WP_002985889.1		M5005_Spy_0311			hypothetical cytosolic protein	NE
SP5448_RS07655		-1.07	0.2634		-1.188	0.2135		-1.266	0.2252		1518764	1519486	-	WP_010921919.1		M5005_Spy_0310			ribosomal large subunit pseudouridine synthase B	NE
SP5448_RS07660		-1.222	0.35		-1.646	0.1992		-1.366	0.2725		1519609	1520160	-	WP_002985894.1		M5005_Spy_0309			hypothetical cytosolic protein	NE
SP5448_RS07665		-0.6431	0.5029		-1.531	0.1072		0.7359	0.4658		1520157	1520858	-	WP_010921918.1		M5005_Spy_0308			hypothetical cytosolic protein	NE
SP5448_RS07670		0.2719	0.794		-0.2788	0.7863		1.868	0.08214		1520858	1521604	-	WP_010921917.1		M5005_Spy_0307			DNA integration/recombination/invertion protein	NE
SP5448_RS07675		-0.02264	0.984		-0.6829	0.5402		-1.272	0.2659		1521601	1522062	-	WP_002985900.1		M5005_Spy_0306			CBS domain containing protein	NE
SP5448_RS07680		-0.3994	0.753		-0.5554	0.6551		-0.8323	0.499		1522059	1522580	-	WP_010921916.1		M5005_Spy_0305			putative phosphoesterase	NE
SP5448_RS07685		-0.1445	0.8992		0.586	0.5989		-0.1637	0.8864		1522559	1523545	-	WP_010921915.1		M5005_Spy_0304			xanthosine triphosphate pyrophosphatase	NE
SP5448_RS07690		-0.1125	0.9249		0.1729	0.8853		1.52	0.1826		1523542	1524336	-	WP_010921914.1		M5005_Spy_0303	glr		glutamate racemase	E
SP5448_RS07695		0.3088	0.7851		0	1		0	1		1524514	1524756	-	WP_002985908.1		M5005_Spy_0302			hypothetical protein	C
SP5448_RS07700		-0.3317	0.7293		0.2141	0.8214		0.8468	0.4011		1524934	1525623	-	WP_010921913.1		M5005_Spy_0301			integral membrane protein	NE
SP5448_RS07705		0.8984	0.4402		-0.5645	0.6234		0.9647	0.4053		1525638	1526138	-	WP_002985912.1		M5005_Spy_0300			hydrolase, HAD superfamily	NE
SP5448_RS07710		-0.7962	0.4703		0.5694	0.6003		-0.05245	0.9632		1526177	1526914	-	WP_002990984.1		M5005_Spy_0299			23S rRNA methyltransferase	NE
SP5448_RS07715		0	1		0	1		0	1		1527212	1527916	+	WP_011285375.1
SP5448_RS07720		0	1		0	1		0	1		1527819	1528334	+	WP_011285692.1		M5005_Spy_1536			transposase	NE
SP5448_RS07725											1528339	1528425	+	WP_032459876.1
SP5448_RS07730		0.7526	0.449		0.6214	0.5273		-1.668	0.1163		1528489	1528767	+	WP_010921912.1		M5005_Spy_0296			acylphosphatase	NE
SP5448_RS07735		0.8409	0.3954		-1.431	0.1504		0.04525	0.9658		1528849	1529772	+	WP_010921911.1		M5005_Spy_0295			60 kDa inner membrane protein YIDC	E
SP5448_RS07740		-0.8604	0.4723		-1.025	0.3933		-0.9121	0.4224		1530395	1530877	-	WP_002990993.1		M5005_Spy_0293	greA		transcription elongation factor	NE
SP5448_RS07745		0.589	0.6078		-0.1255	0.9109		3.203	0.005267		1530950	1532518	-	WP_002992441.1		M5005_Spy_0292			aminodeoxychorismate lyase family	C
SP5448_RS07750		0.00736	0.9938		0.6442	0.494		0.2858	0.7777		1532636	1533118	-	WP_010921909.1		M5005_Spy_0291			acetyltransferase, GNAT family	NE
SP5448_RS07755		0.3973	0.749		0.7031	0.5704		0.6155	0.5993		1533164	1534492	-	WP_002991005.1		M5005_Spy_0290	murC		UDP-N-acetylmuramate--alanine ligase	E
SP5448_RS07760		-0.5606	0.6636		-0.8365	0.5119		-0.4978	0.6803		1534532	1535134	-	WP_010921908.1		M5005_Spy_0289			hypothetical cytosolic protein	NE
SP5448_RS07765		-0.1995	0.8122		-1.006	0.2298		-1.78	0.04925		1535377	1538472	-	WP_032459878.1		M5005_Spy_0288	snf		SWF/SNF family helicase	NE
SP5448_RS07770		0	1		0	1		0	1		1538682	1539992	-	WP_002991013.1		M5005_Spy_0287	pgdA		GTP-binding protein	E
SP5448_RS07775		0	1		0	1		0	1		1540055	1540957	-	WP_002991016.1		M5005_Spy_0286	dnaI		primosomal protein	E
SP5448_RS07780		0	1		0	1		0	1		1540958	1542133	-	WP_002991019.1		M5005_Spy_0285	dnaB		replicative DNA helicase	E
SP5448_RS07785		0.1226	0.9018		-0.2355	0.8106		1.327	0.201		1542117	1542611	-	WP_002985941.1		M5005_Spy_0284			putative regulatory protein	NE
SP5448_RS07790		-1.902	0.06667		-0.005689	0.9955		3.075	0.003958		1542826	1544328	-	WP_015055916.1		M5005_Spy_0283	covS		TCS-2 histidine kinase CovS, CsrS (PDC domain)	NE
SP5448_RS07795		-0.9648	0.4626		-1.791	0.1644		1.279	0.3004		1544334	1545020	-	WP_002991052.1		M5005_Spy_0282	covR		TCS-2 response regulator CovR, CsrR	NE
SP5448_RS07800		0.05327	0.9652		1.59	0.1808		0.6087	0.6113		1545287	1545820	-	WP_011054200.1		M5005_Spy_0281			hypothetical cytosolic protein	NE
SP5448_RS07805		0.4241	0.6428		2.979	0.001003		3.244	0.0008676		1546054	1546950	-	WP_002985953.1		M5005_Spy_0280			heat shock protein	NE
SP5448_RS07810		-0.5884	0.4039		-0.8807	0.2147		-0.05862	0.9406		1546997	1547554	-	WP_002985956.1		M5005_Spy_0279	lemA		hypothetical protein	NE
SP5448_RS07815		0.8193	0.4458		-1.063	0.324		-2.437	0.03753		1547704	1548417	+	WP_010921904.1		M5005_Spy_0278	gidB		glucose inhibited division protein B	NE
SP5448_RS07820		0.03257	0.977		-1.727	0.1269		0.108	0.9249		1548502	1549878	+	WP_032459877.1		M5005_Spy_0277			potassium uptake protein	NE
SP5448_RS07825		-1.161	0.3781		-0.5702	0.658		-1.425	0.2532		1549888	1550562	+	WP_002991064.1		M5005_Spy_0276			potassium uptake protein	C
SP5448_RS07830		0.09816	0.9058		-4.83	4.518e-08		-5.179	5.468e-07		1550617	1551831	-	WP_010921902.1		M5005_Spy_0275			serine/threonine sodium symporter	NE
SP5448_RS07835		-0.5372	0.4949		-2.103	0.007632		-3.348	9.121e-05		1552065	1553435	+	WP_011285394.1		M5005_Spy_0274	braB		branched-chain amino acid transport system carrier protein	NE
SP5448_RS07840		0.2218	0.8223		-2.667	0.008519		-3.346	0.003218		1553489	1554181	-	WP_002991836.1		M5005_Spy_0273			ABC transporter permease protein	NE
SP5448_RS07845		0.4399	0.5965		-2.187	0.01012		-1.547	0.1081		1554182	1555246	-	WP_002985970.1		M5005_Spy_0272			ABC transporter ATP-binding protein	NE
SP5448_RS07850		-0.09609	0.9199		-2.351	0.01297		-1.164	0.2469		1555496	1556341	-	WP_010921899.1		M5005_Spy_0271			ABC transporter substrate-binding protein	NE
SP5448_RS07855		-0.1469	0.8998		0.5267	0.6447		1.336	0.2529		1556670	1557512	-	WP_009880638.1		M5005_Spy_0270			ABC transporter substrate-binding protein	NE
SP5448_RS07860		0.5671	0.5923		0.02065	0.9842		0.7276	0.5027		1557715	1558431	-	WP_002985979.1		M5005_Spy_0269			hypothetical cytosolic protein	NE
SP5448_RS07865		0.05585	0.9527		-0.6684	0.4738		-0.2247	0.821		1558913	1560019	-	WP_010921898.1		M5005_Spy_0267			hypothetical cytosolic protein	NE
SP5448_RS07870		-0.3705	0.6796		-1.449	0.1088		-1.341	0.1844		1560273	1561016	-	WP_014407307.1		M5005_Spy_0266			methyltransferase	NE
SP5448_RS07875		0.9673	0.2318		0.4797	0.553		0.6827	0.4351		1561064	1561417	-	WP_015055915.1		M5005_Spy_0265			iojap protein family	NE
SP5448_RS07880		-0.02373	0.9839		0.9527	0.4206		0.06982	0.9502		1561441	1562034	-	WP_002985989.1		M5005_Spy_0264			hydrolase, HAD superfamily	NE
SP5448_RS07885		0	1		0	1		1.262	0.2478		1562031	1562663	-	WP_010921896.1		M5005_Spy_0263	nadD		nicotinate-nucleotide adenylyltransferase	E
SP5448_RS07890		-0.2557	0.8384		0.3407	0.7813		-0.7072	0.5651		1562732	1563040	-	WP_002991094.1		M5005_Spy_0262			hypothetical RNA binding protein	NE
SP5448_RS07895		-0.9157	0.4246		-0.7266	0.5306		-0.5466	0.6197		1563065	1564183	-	WP_002991828.1		M5005_Spy_0261			GTP-binding protein	C
SP5448_RS07900		-0.9862	0.3864		-1.159	0.3023		-1.123	0.3358		1564183	1564710	-	WP_002991099.1		M5005_Spy_0260			putative lipase	E
SP5448_RS07905											1564785	1564868	-	WP_003051036.1
SP5448_RS07910		0	1		0	1		0	1		1564873	1565388	-	WP_011285376.1		M5005_Spy_0258			transposase	NE
SP5448_RS07915		0	1		0	1		0	1		1565291	1565995	-	WP_032462296.1
SP5448_RS07920		0	1		0	1		0	1		1566606	1567091	-	WP_002988129.1		M5005_Spy_0256	comX1.		competence-specific sigma factor	NE
SP5448_RS07955		-0.08768	0.9262		-0.2913	0.758		3.676	0.0002749		1572875	1573948	-	WP_010922654.1		M5005_Spy_1620			glycerate kinase	NE
SP5448_RS07960		0.5193	0.4077		0.6092	0.3368		0.1046	0.881		1574299	1577277	+	WP_010922655.1		M5005_Spy_1621	hsdR		type I restriction-modification system restriction subunit	NE
SP5448_RS07965		0.3843	0.7088		0.1846	0.8554		1.065	0.3159		1577290	1578489	+	WP_010922656.1		M5005_Spy_1622	hsdS		type I restriction-modification system specificity subunit	NE
SP5448_RS07970		-0.3419	0.692		0.5506	0.5215		-1.093	0.2364		1578502	1580082	+	WP_010922657.1		M5005_Spy_1623	hsdM		type I restriction-modification system methylation subunit	NE
SP5448_RS07975		0.4892	0.5114		-0.2798	0.7091		1.582	0.0598		1580292	1580492	-	WP_011018219.1		M5005_Spy_1624			hypothetical protein	NE
SP5448_RS07980		-0.2106	0.8484		-1.062	0.3256		-2.334	0.03752		1580635	1581240	-	WP_010922658.1		M5005_Spy_1625	salR		TCS-12 response regulator degU; Salivaricin biosyn	NE
SP5448_RS07985		0.4272	0.4795		0.181	0.7673		1.228	0.06892		1581221	1582783	-	WP_011285713.1		M5005_Spy_1626	salK		TCS-12 sensor kinase; Salivaricin biosynthesis	NE
SP5448_RS07990		0.1892	0.7462		0.06993	0.9061		0.8226	0.2095		1582823	1584730	-	WP_010922659.1		M5005_Spy_1627	salY		ABC transporter permease protein	NE
SP5448_RS07995		-0.3076	0.7616		-0.2763	0.7832		-1.554	0.1509		1584732	1585469	-	WP_000812013.1		M5005_Spy_1628			ABC transporter ATP-binding protein	NE
SP5448_RS08000		0.04604	0.9638		-0.9422	0.3496		1.276	0.2279		1585466	1585927	-	WP_011285714.1		M5005_Spy_1629	salX		lantibiotic transport ATP-binding protein	NE
SP5448_RS08005		-0.2453	0.7447		0.2027	0.7886		0.2101	0.7985		1586001	1587626	-	WP_011285715.1		M5005_Spy_1630	salB		serine (threonine) dehydratase	NE
SP5448_RS08010		1.033	0.3172		-0.3384	0.7428		-1.805	0.1113		1587709	1587864	-	WP_002982773.1		M5005_Spy_1631	salA		lantibiotic salivaricin A	NC
SP5448_RS08015		0.3996	0.5412		1.155	0.08032		0.1194	0.8693		1588367	1589773	-	WP_010922661.1		M5005_Spy_1632	lacG		6-phospho-beta-galactosidase	NE
SP5448_RS08020		0.7177	0.4294		0.5513	0.5409		0.5248	0.5862		1589861	1591558	-	WP_010922662.1		M5005_Spy_1633	lacE		PTS system, Lactose-specific IIBC component	NE
SP5448_RS08025		0.5889	0.5439		0.2816	0.7703		-1.923	0.07599		1591558	1591875	-	WP_002982760.1		M5005_Spy_1634	lacF		PTS system, Lactose-specific IIA component	NE
SP5448_RS08030		-0.329	0.7516		-0.2057	0.8405		0.8963	0.4022		1591899	1592882	-	WP_002982755.1		M5005_Spy_1635	lacD.2		tagatose-bisphosphate aldolase	NE
SP5448_RS08035		-0.6612	0.3738		-0.5166	0.4891		0.5061	0.5407		1592886	1593815	-	WP_010922663.1		M5005_Spy_1636	lacC.2		tagatose-6-phosphate kinase	NE
SP5448_RS08040		-0.3135	0.7317		0.3395	0.7083		1.002	0.3038		1593863	1594378	-	WP_002988082.1		M5005_Spy_1637	lacB.2		galactose-6-phosphate isomerase lacB subunit	NE
SP5448_RS08045		-0.1745	0.885		-0.01451	0.9902		2.715	0.02109		1594413	1594841	-	WP_010922664.1		M5005_Spy_1638	lacA.2		galactose-6-phosphate isomerase lacA subunit	NE
SP5448_RS08050		-0.9575	0.2984		-0.1544	0.8657		0.8689	0.3747		1595288	1596061	+	WP_002982738.1		M5005_Spy_1639	lacR.2		lactose phosphotransferase system repressor	NE
SP5448_RS08055		-0.0751	0.9511		-0.6556	0.585		1.811	0.1282		1596722	1597009	+	WP_002988079.1		M5005_Spy_1640			DNA-damage-inducible protein J	NE
SP5448_RS08060		-0.1781	0.8762		-0.6524	0.5634		-0.09134	0.9369		1596999	1597334	+	WP_010922665.1		M5005_Spy_1641			hypothetical cytosolic protein	NE
SP5448_RS08065		0.7354	0.5548		-0.4572	0.7085		1.235	0.3048		1597756	1597956	+	WP_011285718.1		M5005_Spy_1644			hypothetical protein	NC
SP5448_RS08070		0.3088	0.7851		0	1		0	1		1598559	1598951	-	WP_002982716.1		M5005_Spy_1646	rpsI		SSU ribosomal protein S9P	NC
SP5448_RS08075		0	1		0	1		0	1		1598972	1599418	-	WP_002982710.1		M5005_Spy_1647	rplM		LSU ribosomal protein L13P	NC
SP5448_RS08080		0	1		0	1		0	1		1599636	1599842	-	WP_002982695.1		M5005_Spy_1648			transcriptional regulator, Cro/CI family	NC
SP5448_RS08085		-0.01801	0.987		1.279	0.2396		1.547	0.1681		1599839	1600345	-	WP_002988070.1		M5005_Spy_1649			hypothetical membrane spanning protein	NE
SP5448_RS08090		0.1834	0.8635		-1.145	0.2795		1.936	0.07635		1600481	1601341	-	WP_002982687.1		M5005_Spy_1650			degV family protein	NE
SP5448_RS08095		-0.7667	0.278		-0.5255	0.4601		0.9175	0.2436		1601438	1601956	-	WP_002982682.1		M5005_Spy_1651			hypothetical cytosolic protein	NE
SP5448_RS08100		-1.136	0.1764		0.06165	0.9413		-0.2446	0.7864		1601960	1602706	-	WP_010922667.1		M5005_Spy_1652			23S rRNA methyltransferase	NE
SP5448_RS08105		-0.1088	0.8747		-0.2097	0.7633		0.9148	0.247		1602753	1603550	-	WP_010922668.1		M5005_Spy_1653			hypothetical membrane associated protein	NE
SP5448_RS08110		-0.3516	0.6833		-1.369	0.1166		0.6074	0.5283		1603746	1604159	-	WP_002982672.1		M5005_Spy_1654			hypothetical protein	NE
SP5448_RS08115		0	1		0	1		0	1		1604152	1605495	-	WP_010922669.1		M5005_Spy_1655	cysS		cysteinyl-tRNA synthetase	E
SP5448_RS08120		-0.4576	0.6982		-0.917	0.4303		1.979	0.08878		1605523	1605753	-	WP_010922670.1		M5005_Spy_1656			hypothetical protein	NE
SP5448_RS08125		-1.436	0.2695		-1.735	0.173		0.7482	0.5431		1606232	1606813	-	WP_010922671.1		M5005_Spy_1658	cysE		serine acetyltransferase	NC
SP5448_RS08130		-1.096	0.3562		-0.4994	0.676		-0.7899	0.4847		1606822	1607574	-	WP_010922672.1		M5005_Spy_1659			hypothetical protein	NE
SP5448_RS08135		-1.026	0.3117		-1.037	0.3037		-0.4375	0.687		1607567	1609699	-	WP_010922673.1		M5005_Spy_1660			polyribonucleotide nucleotidyltransferase	NE
SP5448_RS08140		0.312	0.711		0.9815	0.2426		1.594	0.07994		1609980	1610708	-	WP_011285719.1		M5005_Spy_1661			transaldolase	NE
SP5448_RS08145		0.72	0.4962		-0.8471	0.4216		-1.235	0.2704		1610864	1612099	-	WP_010922675.1		M5005_Spy_1662			putative transport protein	NE
SP5448_RS08150		1.552	0.2123		-0.2701	0.8256		-1.592	0.1964		1612126	1612410	-	WP_002982644.1		M5005_Spy_1663			PTS system, Mannitol-specific IIB component	NE
SP5448_RS08155		0.5626	0.485		0.4405	0.5845		0.7776	0.3727		1612403	1614463	-	WP_010922676.1		M5005_Spy_1664			PTS system, Mannitol-specific IIA component	NE
SP5448_RS08160		0.2322	0.8375		0	1		0	1		1614815	1615084	-	WP_010922677.1		M5005_Spy_1666			SSU ribosomal protein S15P	NC
SP5448_RS08165		-0.1706	0.8537		0.4905	0.5931		0.3777	0.7006		1615523	1615792	+	WP_002982627.1		M5005_Spy_1668			putative transcriptional regulator	NE
SP5448_RS08170		0	1		0.4013	0.7258		0	1		1615893	1616507	+	WP_002982624.1		M5005_Spy_1669	def		peptide deformylase	E
SP5448_RS08175		-0.2735	0.8294		0.1164	0.9253		-1.247	0.3139		1616541	1617083	-	WP_010922679.1		M5005_Spy_1670			oxidoreductase	NE
SP5448_RS08180		0.9017	0.1755		1.508	0.0247		1.226	0.09638		1617214	1617642	-	WP_002982615.1		M5005_Spy_1671			transcriptional regulator, MarR family	NE
SP5448_RS08185		-0.2547	0.8452		-0.9351	0.4648		-1.591	0.2019		1617752	1622149	-	WP_011285722.1		M5005_Spy_1672	polC		DNA polymerase III alpha subunit	E
SP5448_RS08190		0	1		0	1		0	1		1622404	1624260	-	WP_010922681.1		M5005_Spy_1673	proS		prolyl-tRNA synthetase	E
SP5448_RS08195		-1.088	0.264		-3.396	0.0004403		-2.804	0.006317		1624458	1625717	-	WP_011285723.1		M5005_Spy_1674			pheromone-processing membrane metalloprotease	NE
SP5448_RS08200		1.084	0.3982		0.615	0.625		1.354	0.2732		1625790	1626584	-	WP_002982606.1		M5005_Spy_1675	cdsA		phosphatidate cytidylyltransferase	E
SP5448_RS08205		0	1		0	1		0	1		1626597	1627346	-	WP_010922683.1		M5005_Spy_1676	uppS		undecaprenyl pyrophosphate synthetase	E
SP5448_RS08210		-0.7082	0.5552		-0.9944	0.4084		-0.8856	0.4367		1627565	1627930	-	WP_011285724.1		M5005_Spy_1677	yajC		protein translocase subunit	NE
SP5448_RS08215		-0.8124	0.5113		-0.1476	0.9026		3.918	0.0009463		1628046	1628393	-	WP_011285725.1		M5005_Spy_1678			thioredoxin	NE
SP5448_RS08220		-0.07198	0.9213		0.1473	0.8405		1.265	0.1133		1628535	1632032	-	WP_010922686.1		M5005_Spy_1680	pulA		pullulanase	NE
SP5448_RS08225		-0.1376	0.8762		0.07286	0.9339		0.4036	0.6697		1632230	1633843	-	WP_011285728.1		M5005_Spy_1681	dexB		glucan 1,6-alpha-glucosidase	NE
SP5448_RS08230		-0.8601	0.4228		-1.005	0.3419		0.3796	0.7295		1633972	1635105	-	WP_010922688.1		M5005_Spy_1682	msmK		multiple sugar transport ATP-binding protein	NE
SP5448_RS08235		0.3294	0.6648		1.127	0.1391		-0.9713	0.2426		1635403	1636251	-	WP_010922689.1		M5005_Spy_1683	lrp		leucine rich protein	NE
SP5448_RS08240		-0.9072	0.3102		-0.2572	0.7722		0.5426	0.5689		1636611	1637933	+	WP_010922690.1		M5005_Spy_1684	ska		streptokinase	NE
SP5448_RS08245		-0.8611	0.4597		-0.05489	0.9615		1.028	0.3753		1638031	1638474	-	WP_010922691.1		M5005_Spy_1685			D-tyrosyl-tRNA(Tyr) deacylase	NE
SP5448_RS08250		-1.101	0.4045		-1.551	0.2322		-1.504	0.2242		1638489	1640708	-	WP_002988003.1		M5005_Spy_1686	relA		GTP pyrophosphokinase/guanosine-3',5'-bis(diphosphate) 3'-pyrophosphohydrolase	E
SP5448_RS08255		-0.4193	0.7073		0.1704	0.876		-0.6173	0.5839		1640960	1642006	-	WP_047343332.1		M5005_Spy_1687	sclA		collagen-like surface protein A; Mga-regulated	NE
SP5448_RS08260		-0.9274	0.4188		-0.7399	0.5232		-0.5616	0.6101		1642388	1642870	+	WP_010922694.1		M5005_Spy_1690			nrdl.1	NE
SP5448_RS08265		-0.1784	0.8219		-0.1472	0.8528		1.294	0.1328		1643264	1644082	-	WP_010922695.1		M5005_Spy_1691			exodeoxyribonuclease III	NE
SP5448_RS08270		-0.2076	0.7621		-0.2138	0.757		1.362	0.07435		1644165	1646351	-	WP_010922696.1		M5005_Spy_1693				NE
SP5448_RS08275		-0.1888	0.8714		0.267	0.8144		2.046	0.07795		1646709	1647458	-	WP_010922697.1		M5005_Spy_1694			hypothetical cytosolic protein	NE
SP5448_RS08280		0.1499	0.8373		0.2949	0.688		0.8616	0.2897		1647458	1648411	-	WP_010922698.1		M5005_Spy_1695			ribosomal protein L11 methyltransferase	NE
SP5448_RS08285		-0.296	0.7862		-0.7273	0.4964		1.537	0.1654		1648482	1648952	-	WP_011285734.1		M5005_Spy_1696			hypothetical protein	NE
SP5448_RS08290		-0.06119	0.9498		-1.166	0.2269		0.6111	0.5512		1649152	1650909	+	WP_010922700.1		M5005_Spy_1697			para-aminobenzoate synthetase component I/4-amino-4-deoxychorismate lyase	NE
SP5448_RS08295		-0.08756	0.929		-3.026	0.003031		-2.569	0.02118		1650942	1651508	+	WP_010922701.1		M5005_Spy_1698	trpG		anthranilate synthase component II/para-aminobenzoate synthase glutamine amidotransferase component II	NC
SP5448_RS08300		0.0007126	0.9993		0.6067	0.4585		1.76	0.04735		1651541	1652809	+	WP_011285735.1		M5005_Spy_1699			ATPase, AAA family	NE
SP5448_RS08310		-0.1646	0.8841		-1.227	0.2751		-1.107	0.3462		1653306	1653746	+	WP_010922703.1		M5005_Spy_1700			acetyltransferase	NE
SP5448_RS08315		-0.4742	0.5149		-0.07804	0.9151		1.157	0.1501		1653801	1654307	+	WP_010922704.1		M5005_Spy_1701	flaR		DNA topology modulation protein flar-related protein	NE
SP5448_RS08320		-0.618	0.5001		-0.4247	0.6415		0.23	0.8149		1654556	1655257	+	WP_010922705.1		M5005_Spy_1702	smeZ		mitogenic exotoxin Z	NE
SP5448_RS08325		-0.7337	0.4783		-2.662	0.0102		-0.8304	0.4411		1655541	1655807	-	WP_011285736.1		M5005_Spy_1703			hypothetical cytosolic protein	NE
SP5448_RS08330		1.252	0.1141		2.076	0.008785		2.395	0.005294		1655986	1657614	+	WP_010922707.1		M5005_Spy_1704	dppA		dipeptide-binding protein	NE
SP5448_RS08335		0.2531	0.8189		-0.01544	0.9886		0.6965	0.534		1657727	1658704	+	WP_009880585.1		M5005_Spy_1705	dppB		dipeptide transport system permease protein	NE
SP5448_RS08340		0.2577	0.6876		0.4364	0.5003		0.8154	0.253		1658701	1659522	+	WP_002982520.1		M5005_Spy_1706	dppC		dipeptide transport system permease protein	NE
SP5448_RS08345		0.01559	0.9863		0.7902	0.3808		0.05648	0.9534		1659534	1660337	+	WP_003059481.1		M5005_Spy_1707	dppD		dipeptide transport ATP-binding protein	NE
SP5448_RS08350		0.1743	0.8204		0.05268	0.9454		0.8835	0.2931		1660321	1660947	+	WP_010922708.1		M5005_Spy_1708	dppE		dipeptide transport ATP-binding protein	NE
SP5448_RS08355		0.5606	0.6684		0.2791	0.8287		-0.1999	0.8702		1661028	1661228	-	WP_002982507.1		M5005_Spy_1709			hypothetical protein	NE
SP5448_RS08360		0.4275	0.6003		-0.1984	0.8077		0.0009429	0.9991		1661397	1663874	-	WP_010922709.1		M5005_Spy_1710			streptococcal histidine triad protein	NE
SP5448_RS08365		-0.0439	0.9669		-2.622	0.01271		-2.25	0.04103		1663887	1664807	-	WP_002987954.1		M5005_Spy_1711	lsp		laminin binding lipoprotein; virulence assoc; AdcR- repressed	NE
SP5448_RS08370		0.3088	0.7851		0	1		0	1		1664885	1664980	-	WP_025193999.1
SP5448_RS08375		0	1		0	1		0	1		1664985	1665500	-	WP_032461697.1		M5005_Spy_0297			transposase	NE
SP5448_RS08380		0	1		0	1		0	1		1665403	1666107	-	WP_011285375.1		M5005_Spy_1537			transposase	NE
SP5448_RS08385		0.08898	0.9048		1.407	0.05962		0.9414	0.2476		1666358	1667407	-	WP_047343333.1		M5005_Spy_1714	fba		cell surface protein; Mga-regulated	NE
SP5448_RS08390		-1.005	0.1765		-0.3881	0.6032		-0.02818	0.9724		1667504	1670998	-	WP_011285740.1		M5005_Spy_1715	scpA		C5A peptidase precursor; Mga-regulated	NE
SP5448_RS08400		-0.728	0.4771		0.2066	0.8383		2.043	0.05448		1673216	1674196	-	WP_047343334.1		M5005_Spy_1718	sic1.0		streptococcal inhibitor of complement; Mga-regulated	NE
SP5448_RS08405		-0.005271	0.9956		-0.2063	0.8283		-0.509	0.6134		1674385	1675839	-	WP_011285743.1		M5005_Spy_1719	emm1		M protein; Mga-regulated	NE
SP5448_RS08410		-0.513	0.5402		-1.978	0.01785		-2.543	0.004723		1676024	1677613	-	WP_010922715.1		M5005_Spy_1720	mga		Multi-virulence gene regulator Mga	NE
SP5448_RS08415		-0.6331	0.6255		-1.229	0.334		0.2426	0.8446		1678289	1678540	-	WP_002982472.1		M5005_Spy_1722			hypothetical protein	NE
SP5448_RS08420		-0.1778	0.8643		-0.004404	0.9966		0.659	0.5379		1678619	1680220	-	WP_011285745.1		M5005_Spy_1723	isp1		immunogenic secreted protein	NE
SP5448_RS08425		-0.07746	0.9094		1.539	0.02494		1.161	0.1227		1680322	1681710	-	WP_010922717.1		M5005_Spy_1724	ihk		TCS-13 histidine kinase; PMN survival (PDC domain)	NE
SP5448_RS08430		0.3093	0.7515		-0.4982	0.6075		0.8495	0.4097		1681707	1682360	-	WP_002991237.1		M5005_Spy_1725	irr		TCS-13 response regulator;PMN survival	NE
SP5448_RS08435		-0.2057	0.7765		1.135	0.1191		-1.024	0.1991		1682454	1683671	-	WP_002993552.1		M5005_Spy_1726	hitC		ABC transporter permease; Heme-induced Transporter	NE
SP5448_RS08440		-1.079	0.2739		-0.9162	0.347		0.181	0.8605		1683684	1684358	-	WP_002982458.1		M5005_Spy_1727	hitB		; Heme-induced Transporter; Heme-induced Transporter	NE
SP5448_RS08445		-0.9558	0.2874		-0.6477	0.4681		1.203	0.2087		1684345	1685613	-	WP_010922718.1		M5005_Spy_1728	hitA		periplasmic efflux compon.; Heme-induced Transporter	NE
SP5448_RS08450		-0.406	0.6848		-0.02402	0.9806		-1.146	0.2713		1686036	1686320	-	WP_002982442.1		M5005_Spy_1729			hypothetical protein	NE
SP5448_RS08455		-1.506	0.1661		-1.309	0.2234		0.5521	0.6187		1686467	1686763	-	WP_002982439.1		M5005_Spy_1730	ship		SHIP-histidine rich GP interacting protein	NE
SP5448_RS08460		-1.33	0.2777		-2.029	0.09263		-0.2868	0.8106		1687007	1687243	+	WP_011285231.1		M5005_Spy_1731	grm		gene regulated by Mga;; Mga-regulated	NE
SP5448_RS08465		0.1537	0.8937		-0.271	0.8152		-0.1216	0.9121		1687519	1688448	-	WP_010922719.1		M5005_Spy_1732	prsA		protein export protein prsA precursor	C
SP5448_RS08470		-0.34	0.7642		-0.16	0.8889		0.09716	0.9291		1688928	1689233	-	WP_002993568.1		M5005_Spy_1734	speI		streptopain SpeB inhibitor	NE
SP5448_RS08475		-0.2925	0.6767		0.7967	0.2592		2.713	0.0004749		1689235	1690431	-	WP_010922720.1		M5005_Spy_1735	speB		streptococcal pyrogenic exotoxin B	NE
SP5448_RS08480		-0.1466	0.852		0.2165	0.7834		1.127	0.19		1691371	1692213	+	WP_002982409.1		M5005_Spy_1737	rgg, ropB		Stand-alone transcriptional regulator Rgg, RopB	NE
SP5448_RS08485		-0.6591	0.4934		0.7705	0.4193		-1.169	0.2575		1692454	1693269	-	WP_010922721.1		M5005_Spy_1738	spd		phage-associated deoxyribonuclease	NE
SP5448_RS08490		-0.3862	0.6269		-0.02419	0.9757		1.623	0.06106		1693633	1694142	+	WP_009880864.1		M5005_Spy_1740			low temperature requirement C protein	NE
SP5448_RS08495		-0.9184	0.3105		-0.1355	0.8802		-0.1907	0.8426		1694224	1695312	-	WP_010922722.1		M5005_Spy_1741	gldA		glycerol dehydrogenase	NE
SP5448_RS08500		0.4313	0.5727		1.286	0.09362		0.9146	0.2792		1695369	1696037	-	WP_011285749.1		M5005_Spy_1742	mipB		transaldolase	NE
SP5448_RS08505		0.1825	0.8268		-0.1744	0.8341		1.699	0.05882		1696050	1698467	-	WP_010922724.1		M5005_Spy_1743	pflD		formate acetyltransferase	NE
SP5448_RS08510		-0.3152	0.6226		-0.06231	0.9233		0.07726	0.9138		1698677	1699981	-	WP_010922725.1		M5005_Spy_1744	celC		PTS system, Cellobiose-specific IIC component	NE
SP5448_RS08515		-0.3884	0.7486		-0.22	0.8533		0.1338	0.9107		1699991	1700299	-	WP_002992103.1		M5005_Spy_1745	celB		PTS system, Cellobiose-specific IIB component	NE
SP5448_RS08520		-1.095	0.3169		-2.255	0.03859		-0.5638	0.6163		1700327	1700647	-	WP_002992105.1		M5005_Spy_1746	celA		PTS system, Cellobiose-specific IIA component	NE
SP5448_RS08525		0.5408	0.4607		1.096	0.1367		0.9457	0.2476		1700935	1701915	-	WP_002991275.1		0M5005_Spy_1747			sorbitol operon regulator	NE
SP5448_RS08530		0.3466	0.7321		1.495	0.1347		-2.81	0.01143		1701931	1702677	-	WP_002991277.1		M5005_Spy_1748			transcriptional regulator, DeoR family	NE
SP5448_RS08535		0.6158	0.5198		0.7465	0.4304		1.152	0.2513		1702803	1703576	+	WP_010922726.1		M5005_Spy_1749			pyruvate formate-lyase activating enzyme	NE
SP5448_RS08540		0.01163	0.993		0.2311	0.8587		-0.6165	0.6188		1703611	1703811	+	WP_011285751.1		M5005_Spy_1750			hypothetical protein	NE
SP5448_RS08545		0	1		0	1		0	1		1703813	1703989	-	WP_002982348.1		M5005_Spy_1751	secE		protein translocase subunit	NC
SP5448_RS08550		0.02508	0.9669		0.2096	0.7322		0.4906	0.4709		1704204	1706540	-	WP_010922727.1		M5005_Spy_1753	pbp2A		multimodular transpeptidase-transglycosylase	NE
SP5448_RS08555		0.601	0.578		-0.03635	0.9726		1.524	0.1662		1706579	1706959	-	WP_002982339.1		M5005_Spy_1754			translation initiation inhibitor	NE
SP5448_RS08560											1707450	1707641	+	WP_002982334.1
SP5448_RS08565		1.193	0.2607		0.2306	0.8271		-1.998	0.08539		1707625	1708536	+	WP_015056008.1		M5005_Spy_1756			ribosomal large subunit pseudouridine synthase D	NE
SP5448_RS08570		0.001361	0.9982		0.3728	0.55		0.9142	0.1838		1708625	1710265	-	WP_011285753.1		M5005_Spy_1757			hypothetical protein	NE
SP5448_RS08575		-0.1973	0.8341		0.3288	0.7244		1.229	0.2152		1710512	1712008	+	WP_010922730.1		M5005_Spy_1758			probable dipeptidase B	NE
SP5448_RS08580		0.7458	0.4727		-0.136	0.8954		-0.8483	0.4446		1712636	1712818	-	WP_011285755.1		M5005_Spy_1760			transcriptional regulator, MutR family	NE
SP5448_RS08585		0.07751	0.9533		-0.1447	0.9113		1.24	0.3181		1713211	1714842	-	WP_010922731.1		M5005_Spy_1761	groEL		60 kDa chaperonin	E
SP5448_RS08590		0	1		0	1		0	1		1714878	1715168	-	WP_002991292.1		M5005_Spy_1762	groES		10 kDa chaperonin	E
SP5448_RS08595		-0.07253	0.9494		-0.05921	0.9578		-0.2924	0.7996		1715346	1717790	-	WP_010922732.1		M5005_Spy_1763	clpC		negative regulator of genetic competence	NE
SP5448_RS08600		-0.9033	0.4605		-2.296	0.05612		-0.6352	0.5944		1717790	1718251	-	WP_002982312.1		M5005_Spy_1764	ctsR		transcriptional regulator	NE
SP5448_RS08605		-0.6542	0.6005		-1.251	0.3081		-0.3645	0.7641		1718447	1718650	-	WP_002991299.1		M5005_Spy_1765	csp		cold shock protein	NE
SP5448_RS08615		-0.5484	0.5913		-0.9053	0.3731		-0.2004	0.8527		1719646	1720206	+	WP_002982304.1		M5005_Spy_1768	ahpC		peroxiredoxin reductase (NAD(P)H)	NE
SP5448_RS08620		-0.3816	0.623		-0.5084	0.514		-0.1816	0.8338		1720227	1721759	+	WP_002982300.1		M5005_Spy_1769	ahpF		peroxiredoxin reductase (NAD(P)H)	NE
SP5448_RS08625		-0.1019	0.9185		-0.507	0.6056		1.918	0.06384		1721817	1723082	-	WP_011285756.1		M5005_Spy_1770	hutI		imidazolonepropionase	NE
SP5448_RS08630		0.2178	0.7361		0.5097	0.4348		-0.2907	0.6855		1723374	1725404	+	WP_010922734.1		M5005_Spy_1771	hutU		urocanate hydratase	NE
SP5448_RS08635		-0.4318	0.5067		-0.05805	0.9295		-0.7352	0.3101		1725493	1726392	+	WP_010922735.1		M5005_Spy_1772			glutamate formiminotransferase	NE
SP5448_RS08640		0.05796	0.9592		-1.462	0.1935		0.6142	0.5894		1726403	1727029	+	WP_010922736.1		M5005_Spy_1773			formiminotetrahydrofolate cyclodeaminase	NE
SP5448_RS08645		0.3596	0.6355		0.8643	0.2559		-0.1638	0.8437		1727047	1728720	+	WP_010922737.1		M5005_Spy_1774	fhs.2		formate--tetrahydrofolate ligase	NE
SP5448_RS08650		0.07093	0.9505		-1.65	0.1441		0.4537	0.6914		1728742	1729338	+	WP_010922738.1		M5005_Spy_1775			hypothetical cytosolic protein	NE
SP5448_RS08655		0.232	0.7429		0.7448	0.2954		0.2504	0.7478		1729558	1730901	+	WP_010922739.1		M5005_Spy_1776			amino acid permease	NE
SP5448_RS08660		-0.6863	0.4754		-0.01827	0.9847		-0.07556	0.9406		1730912	1732453	+	WP_010922740.1		M5005_Spy_1777	hutH		histidine ammonia-lyase	NE
SP5448_RS08665		0.3537	0.6276		0.9805	0.1808		0.4817	0.5472		1732639	1733625	+	WP_010922741.1		M5005_Spy_1778	hutG		formiminoglutamase	NE
SP5448_RS08670		0.2152	0.8015		0.2211	0.7954		2.387	0.009377		1733656	1736730	-	WP_010922742.1		M5005_Spy_1779			transcriptional regulator, LuxR family	NE
SP5448_RS08675		0	1		0	1		0	1		1737034	1737801	+	WP_002982262.1		M5005_Spy_1780	rpsB		SSU ribosomal protein S2P	E
SP5448_RS08680		0	1		0	1		0	1		1737935	1738975	+	WP_010922743.1		M5005_Spy_1781			protein translation elongation factor Ts	E
SP5448_RS08685		-0.3804	0.7135		-2.762	0.007887		-1.751	0.1085		1739141	1741036	-	WP_011285757.1		M5005_Spy_1782	pepO		neutral endopeptidase	NE
SP5448_RS08690		-0.6141	0.6375		-1.31	0.3055		-0.5053	0.6845		1741244	1742872	-	WP_010922745.1		M5005_Spy_1783	treC		trehalose-6-phosphate hydrolase	NC
SP5448_RS08695		-0.2569	0.8459		0.1408	0.9137		-0.6632	0.5926		1742939	1744963	-	WP_010922746.1		M5005_Spy_1784	treB		PTS system, Trehalose-specific IIBC component	NE
SP5448_RS08700		-0.7041	0.5346		-0.1483	0.8941		-1.811	0.1272		1745174	1745887	+	WP_002992823.1		M5005_Spy_1785	treR		trehalose operon transcriptional repressor	NE
SP5448_RS08710		-0.09273	0.9092		-0.7479	0.3576		-0.05008	0.9547		1746691	1747548	+	WP_010922747.1		M5005_Spy_1787			glyoxalase family protein	NE
SP5448_RS08715		1.186	0.2678		-0.2856	0.7876		2.083	0.05739		1747590	1748321	+	WP_010922748.1		M5005_Spy_1788	yaaA		protein yaaA	NE
SP5448_RS08720		-0.3441	0.7777		0.4786	0.6854		1.585	0.1823		1748495	1749109	-	WP_002982219.1		M5005_Spy_1789	nrdG		anaerobic ribonucleoside-triphosphate reductase activating protein	NE
SP5448_RS08725		-0.5827	0.6548		-1.368	0.2847		-1.781	0.1528		1749109	1749618	-	WP_011285759.1		M5005_Spy_1790			acetyltransferase	NE
SP5448_RS08730		0.7819	0.4914		1.891	0.09097		-0.9524	0.4189		1749627	1750562	-	WP_010922750.1		M5005_Spy_1791			virulence factor	NC
SP5448_RS08735		0.1948	0.848		0.7199	0.4745		2.412	0.02274		1750919	1753117	-	WP_011285760.1		M5005_Spy_1793	nrdD		anaerobic ribonucleoside-triphosphate reductase	C
SP5448_RS08740		-0.07558	0.9291		-2.655	0.0017		-1.478	0.1045		1753214	1754773	-	WP_010922751.1		M5005_Spy_1794			hypothetical membrane spanning protein	NE
SP5448_RS08745		-0.4961	0.6798		-0.6549	0.5867		0.09604	0.933		1755186	1755491	-	WP_002982199.1		M5005_Spy_1795			hypothetical cytosolic protein	NE
SP5448_RS08750		0	1		0.4013	0.7258		0	1		1755503	1755922	-	WP_010922752.1		M5005_Spy_1796			endonuclease involved in recombination	E
SP5448_RS08755		-0.2593	0.8373		-0.7973	0.5246		-0.01185	0.992		1755919	1756188	-	WP_002982194.1		M5005_Spy_1797			hypothetical cytosolic protein	NE
SP5448_RS08760		0.1623	0.8873		-0.003299	0.9977		0.1024	0.9257		1756301	1756699	-	WP_002982188.1		M5005_Spy_1798	spxA2		suppressor of clpP & X SpxA homolog, allele 2	C
SP5448_RS08765		1.914	0.09088		-1.399	0.2252		-0.4074	0.7269		1756990	1758126	-	WP_010922753.1		M5005_Spy_1799	recA		RecA	NE
SP5448_RS08770		0.8726	0.3742		-0.0626	0.9489		0.7586	0.4647		1758215	1759486	-	WP_010922754.1		M5005_Spy_1800	cinA		colligrin	NE
SP5448_RS08775		0.3935	0.7591		-0.4344	0.7304		-1.071	0.3889		1759555	1760115	-	WP_010922755.1		M5005_Spy_1801	tag		DNA-3-methyladenine glycosylase	NC
SP5448_RS08780		-1.909	0.1434		-2.235	0.08036		-1.8	0.1475		1760125	1760721	-	WP_002992186.1		M5005_Spy_1802	ruvA		holliday junction DNA helicase	NC
SP5448_RS08785		0.3335	0.7165		-0.06508	0.9432		1.476	0.1315		1760723	1761943	-	WP_010922756.1		M5005_Spy_1803	lmrP		multidrug resistance protein B	NE
SP5448_RS08790		0.4144	0.605		0.3937	0.6234		-2.504	0.004896		1761954	1763936	-	WP_010922757.1		M5005_Spy_1804	mutL		DNA mismatch repair protein	NC
SP5448_RS08795		0.09603	0.9219		0.6543	0.4993		-1.09	0.2929		1764065	1766620	-	WP_010922773.1		M5005_Spy_1805	mutS		DNA mismatch repair protein	NC
SP5448_RS08800		0.6792	0.509		0.8391	0.4072		0.7804	0.4622		1766607	1766813	-	WP_010922774.1		M5005_Spy_1806			hypothetical cytosolic protein	NE
SP5448_RS08805		1.076	0.3253		1.83	0.08764		1.079	0.3314		1766956	1767393	-	WP_002982171.1		M5005_Spy_1807	argR2		arginine repressor	NE
SP5448_RS08810		-1.508	0.2445		-1.442	0.2555		-2.096	0.09172		1767684	1769375	+	WP_002991367.1		M5005_Spy_1808	argS		arginyl-tRNA synthetase	E
SP5448_RS08815		-0.4147	0.6875		0.1697	0.8675		0.2416	0.8212		1769463	1769771	+	WP_002991370.1		M5005_Spy_1809	uviB		bacteriocin	NE
SP5448_RS08820		-0.7158	0.4811		-1.661	0.09835		0.02769	0.9791		1769798	1770670	-	WP_002982164.1		M5005_Spy_1810			hypothetical membrane spanning protein	NE
SP5448_RS08825		0.2333	0.7758		-0.3324	0.6854		0.8695	0.3348		1770713	1771591	-	WP_002991372.1		M5005_Spy_1811			hypothetical membrane spanning protein	NE
SP5448_RS08830		-0.3688	0.7735		-0.2641	0.8353		-0.5624	0.6397		1771611	1772552	-	WP_010922775.1		M5005_Spy_1812			hypothetical membrane spanning protein	NE
SP5448_RS08835		0	1		0	1		0	1		1772545	1774293	-	WP_011285762.1		M5005_Spy_1813	aspS		aspartyl-tRNA synthetase	E
SP5448_RS08840		0	1		0	1		0	1		1774631	1775911	-	WP_010922777.1		M5005_Spy_1814	hisS		histidyl-tRNA synthetase	E
SP5448_RS08845		-0.4054	0.7207		-0.2332	0.8388		0.01894	0.9862		1776131	1776313	+	WP_000290414.1		M5005_Spy_1815	rpmF		LSU ribosomal protein L32P	NE
SP5448_RS08850		0.05722	0.9655		-0.4956	0.7021		-0.6937	0.5779		1776329	1776478	+	WP_002982147.1		M5005_Spy_1816	rpmG		LSU ribosomal protein L33P	NC
SP5448_RS08855		0.8733	0.3041		1.367	0.1068		0.6967	0.4498		1776771	1777385	+	WP_002995289.1		M5005_Spy_1817	cadD		cadmium resistance protein	NE
SP5448_RS08860		-0.7752	0.4247		-0.6792	0.483		-3.615	0.001137		1777397	1777735	+	WP_002995294.1		M5005_Spy_1818	cadC		cadmium efflux system accessory protein	NE
SP5448_RS08875		-0.01922	0.9837		0.3911	0.6743		-0.6816	0.4942		1779524	1780126	+	WP_002982120.1		M5005_Spy_1821			hypothetical protein	NE
SP5448_RS09130		0.357	0.6321		-0.248	0.741		0.6545	0.4363		1780602	1780883	-	WP_015446326.1
SP5448_RS08885		-1.557	0.2133		-1.551	0.2063		-2.561	0.03746		1781337	1782179	+	WP_002991650.1		M5005_Spy_1823			integral membrane protein	NE
SP5448_RS08890		-0.9744	0.3596		-0.9318	0.3763		0.04252	0.9695		1782226	1782867	-	WP_010922781.1		M5005_Spy_1824			phosphohydrolase	NE
SP5448_RS08895		-0.2311	0.8551		0.5586	0.6572		-0.3891	0.7434		1783074	1783400	+	WP_002982104.1		M5005_Spy_1825			transcriptional regulator, PadR family	NE
SP5448_RS08900		0.42	0.6948		-0.3826	0.7161		1.289	0.2384		1783387	1783974	+	WP_010922782.1		M5005_Spy_1826			hypothetical membrane associated protein	NE
SP5448_RS08905		0.2165	0.8146		-0.3326	0.7164		0.7044	0.4704		1783971	1785050	+	WP_010922783.1		M5005_Spy_1827			hypothetical membrane associated protein	NE
SP5448_RS08910		-0.7307	0.4824		-1.235	0.2274		0.4663	0.663		1785168	1787441	-	WP_015056014.1		M5005_Spy_1828			phage infection protein	NE
SP5448_RS08915		0.7136	0.3098		0.5893	0.405		2.496	0.001494		1787576	1788109	+	WP_010922785.1		M5005_Spy_1830			transcriptional regulator, TetR family	NE
SP5448_RS08920		0	1		0	1		0	1		1788263	1788874	-	WP_002982092.1		M5005_Spy_1831	rpsD		SSU ribosomal protein S4P	E
SP5448_RS08925											1789077	1789160	-	WP_003051036.1
SP5448_RS08930		0	1		0	1		0	1		1789165	1790298	-	WP_011285737.1		M5005_Spy_1833			transposase	NE
SP5448_RS08935		-0.2301	0.8417		-0.401	0.7299		-0.3252	0.7679		1790930	1791202	-	WP_002991405.1		M5005_Spy_1834			hypothetical protein	NE
SP5448_RS08940		0	1		0	1		0	1		1791219	1792580	-	WP_014635792.1		M5005_Spy_1835	holB		replicative DNA helicase	E
SP5448_RS08945		1.812	0.1621		1.459	0.2503		-0.7273	0.5598		1792616	1793068	-	WP_002991410.1		M5005_Spy_1836	rplI		LSU ribosomal protein L9P	NE
SP5448_RS08950		-1.646	0.133		-1.248	0.2462		-2.21	0.05734		1793065	1795041	-	WP_010922788.1		M5005_Spy_1837	gdpP		phosphoesterase, DHH family (PAS domain)	NE
SP5448_RS08955		-1.22	0.3426		-0.4582	0.7126		1.377	0.2558		1795132	1797030	-	WP_010922789.1		M5005_Spy_1838	gidA		glucose inhibited division protein A	C
SP5448_RS08960		-1.112	0.3308		-1.442	0.2012		1.056	0.3552		1797154	1797471	-	WP_010922790.1		M5005_Spy_1839			phosphohydrolase	NE
SP5448_RS08965		-0.1933	0.8651		0.09751	0.9325		0.1199	0.9128		1798248	1799369	-	WP_010922791.1		M5005_Spy_1840	trmU		tRNA (5-methylaminomethyl-2-thiouridylate)-methyltransferase	E
SP5448_RS08970		-0.3479	0.6268		0.05224	0.9421		-0.2545	0.7477		1799667	1800338	+	WP_010922792.1		M5005_Spy_1841	sdhB		L-serine dehydratase; SerR-repressed	NE
SP5448_RS08975		-0.1305	0.8862		-0.376	0.6789		-1.97	0.04707		1800350	1801222	+	WP_010922793.1		M5005_Spy_1842	sdhA		L-serine dehydratase; SerR-repressed	NE
SP5448_RS08980		-0.1222	0.9178		1.303	0.2585		0.8961	0.4449		1801635	1802249	-	WP_010922794.1		M5005_Spy_1843			transglycosylase SLT domain family protein	NE
SP5448_RS08985		-0.1352	0.9051		0.5062	0.6594		0.2414	0.8251		1802621	1803421	-	WP_002991426.1		M5005_Spy_1844	cbiQ		cobalt transport protein	C
SP5448_RS08990		0	1		0	1		0	1		1803414	1804256	-	WP_002982066.1		M5005_Spy_1845	cbiO2		cobalt transport ATP-binding protein	E
SP5448_RS08995		0	1		0	1		0	1		1804232	1805071	-	WP_014407975.1		M5005_Spy_1846	cbiO1		cobalt transport ATP-binding protein	E
SP5448_RS09000		0	1		0	1		0	1		1805073	1805615	-	WP_002991432.1		M5005_Spy_1847			CDP-diacylglycerol--glycerol-3-phosphate 3-phosphatidyltransferase (cardiolipin)	NC
SP5448_RS09005		-0.2861	0.7503		-2.022	0.02359		-0.5971	0.5321		1805629	1806654	-	WP_010922795.1		M5005_Spy_1848			hypothetical membrane associated; (cardiolipin)	NE
SP5448_RS09010		-0.3092	0.6175		2.356	0.0001686		3.984	7.888e-09		1806704	1807993	-	WP_010922796.1		M5005_Spy_1849			zinc protease	NE
SP5448_RS09015		0.8351	0.2604		2.784	0.0001859		6.004	1.365e-13		1807995	1809239	-	WP_011285767.1		M5005_Spy_1850			zinc protease	NE
SP5448_RS09020		-0.1466	0.8528		-0.5489	0.4878		0.147	0.864		1809670	1810929	+	WP_011285768.1		M5005_Spy_1851	hasA		hyaluronan synthase	NE
SP5448_RS09025		0.3475	0.6194		0.8318	0.2375		1.644	0.03305		1810965	1812173	+	WP_009880737.1		M5005_Spy_1852	hasB		UDP-glucose 6-dehydrogenase	NE
SP5448_RS09030		0.7895	0.3502		0.3912	0.6454		-0.1132	0.9071		1812355	1813269	+	WP_010922799.1		M5005_Spy_1853	hasC		UTP--glucose-1-phosphate uridylyltransferase	NE
SP5448_RS09035		0.1515	0.8958		-0.03411	0.9761		2.48	0.03083		1813577	1813990	+	WP_010922800.1		M5005_Spy_1854			hypothetical cytosolic protein	NE
SP5448_RS09040		-1.299	0.3032		-2.067	0.09562		-2.437	0.04829		1813992	1815098	+	WP_010922801.1		M5005_Spy_1855	recF		DNA replication and repair protein	NE
SP5448_RS09045		-0.1038	0.9098		0.478	0.5995		-1.089	0.2728		1815153	1816016	-	WP_002992310.1		M5005_Spy_1856			glucose uptake protein; Non-PTS glucose uptake	NE
SP5448_RS09050		-0.5331	0.5645		-0.5841	0.5252		-2.378	0.01675		1816218	1817699	-	WP_002991454.1		M5005_Spy_1857	guaB		inosine-5'-monophosphate dehydrogenase	NE
SP5448_RS09055		0	1		0	1		1.516	0.1662		1818037	1819059	-	WP_010922803.1		M5005_Spy_1858	trsA		tryptophanyl-tRNA synthetase	E
SP5448_RS09060		-0.8758	0.2877		1.476	0.07272		0.03586	0.9678		1819478	1820350	+	WP_002982011.1		M5005_Spy_1860			hypothetical membrane spanning protein	NE
SP5448_RS09065		0.06849	0.9202		-0.08103	0.9064		1.547	0.04435		1820429	1822048	+	WP_002981986.1		M5005_Spy_1861			ABC transporter ATP-binding protein	NE
SP5448_RS09070		-0.662	0.4734		-0.275	0.7643		-0.7367	0.4558		1822131	1824707	+	WP_010922804.1		M5005_Spy_1862			ABC transporter, permease protein	NE
SP5448_RS09085		0	1		0	1		0	1		1825873	1826154	-	WP_011285769.1
SP5448_RS09090		0	1		0	1		0	1		1826078	1826347	-	WP_015056017.1
SP5448_RS09100		0.9597	0.2965		1.345	0.1402		2.629	0.006882		1826736	1827215	-	WP_002981964.1		M5005_Spy_1864			hypothetical cytosolic protein	NE
SP5448_RS09105		-0.6542	0.6209		-1.543	0.2335		1.276	0.3024		1827427	1828650	+	WP_002994926.1		M5005_Spy_1865	htrA		protease Do	C
SP5448_RS09110		-0.05981	0.9467		-0.8302	0.3518		-0.4667	0.6275		1828739	1829515	+	WP_014407987.1		M5005_Spy_1866	parB		chromosome partitioning protein	NE
		0	1		0	1		0	1
																			*CRE-based on DebRo et al (2016) Scientific Reports
Table S4. Integrated gene essentiality determination for GAS M1T1 5448 for all time points.																			C = classic CRE; C = CRE2 from S. suis
(a) Spy numbers from MGAS5005 genome.
(b) When available, gene name is provided.
(c) Call integrating data from Bayesian analyses on 3 time points.
(d) Hyperlink to the NCBI Gene website (http://www.ncbi.nlm.nih.gov/gene).
(e) Information on transcription units based on the work of McClure et al. (2013).
(f) Asteriks refer to genes found in the GAS core genome.
